# Supplementary material
Source: PubMed Central journal article supplement (PMC9805530)

## *Supporting Information*

### **Design, Synthesis and Pharmacological Evaluations of Pyrrolo[1,2-*a*]quinoxaline-based Derivatives as Potent and Selective Sirt6 Activators**

Jimin Xu<sup>a,1</sup>, Shuizhen Shi<sup>b,1</sup>, Gang Liu<sup>a</sup>, Xuping Xie<sup>c</sup>, Jun Li<sup>a</sup>, Andrew A. Bolinger<sup>a</sup>, Haiying Chen<sup>a</sup>, Wenbo Zhang<sup>b</sup>, Pei-Yong Shi<sup>c</sup>, Hua Liu<sup>b,\*</sup> and Jia Zhou<sup>a,\*</sup>

<sup>a</sup>*Chemical Biology Program, Department of Pharmacology and Toxicology, <sup>b</sup>Department of Ophthalmology and Visual Sciences, and <sup>c</sup>Department of Biochemistry and Molecular Biology, University of Texas Medical Branch, Galveston, Texas 77555, United States*

<sup>1</sup>These authors contribute equally to this work.

#### **Table of Contents**

|                                                    |         |
|----------------------------------------------------|---------|
| Copies of representative HPLC .....                | S2-S16  |
| Copies of NMR spectra for all final compounds..... | S17-S66 |

Copies of representative HPLC

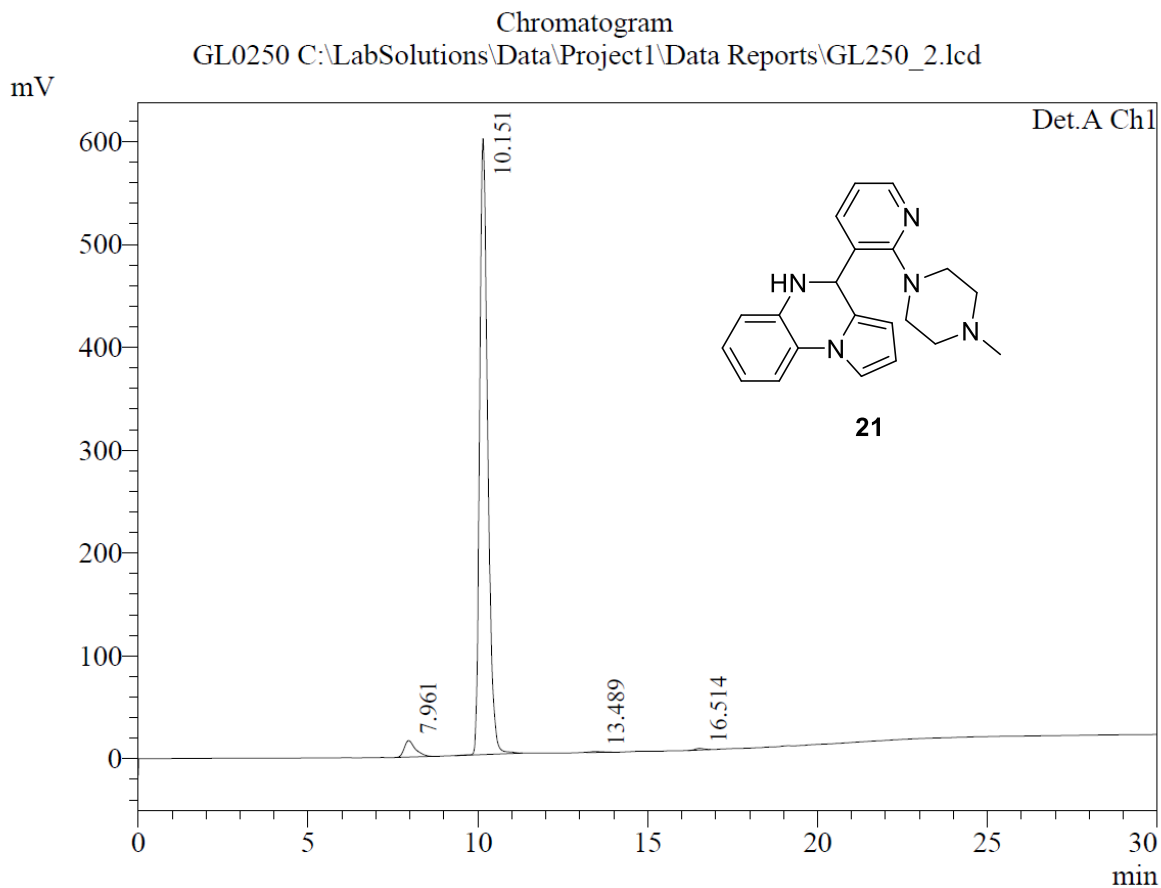

PeakTable

Detector A Ch1 254nm

| Peak# | Ret. Time | Area     | Area %  | Height % |
|-------|-----------|----------|---------|----------|
| 1     | 7.961     | 364671   | 3.519   | 2.593    |
| 2     | 10.151    | 9946742  | 95.994  | 96.994   |
| 3     | 13.489    | 23915    | 0.231   | 0.153    |
| 4     | 16.514    | 26550    | 0.256   | 0.260    |
| Total |           | 10361878 | 100.000 | 100.000  |

Chromatogram  
 GL0695A C:\LabSolutions\Data\Project1\Data Reports\GL695A1.lcd

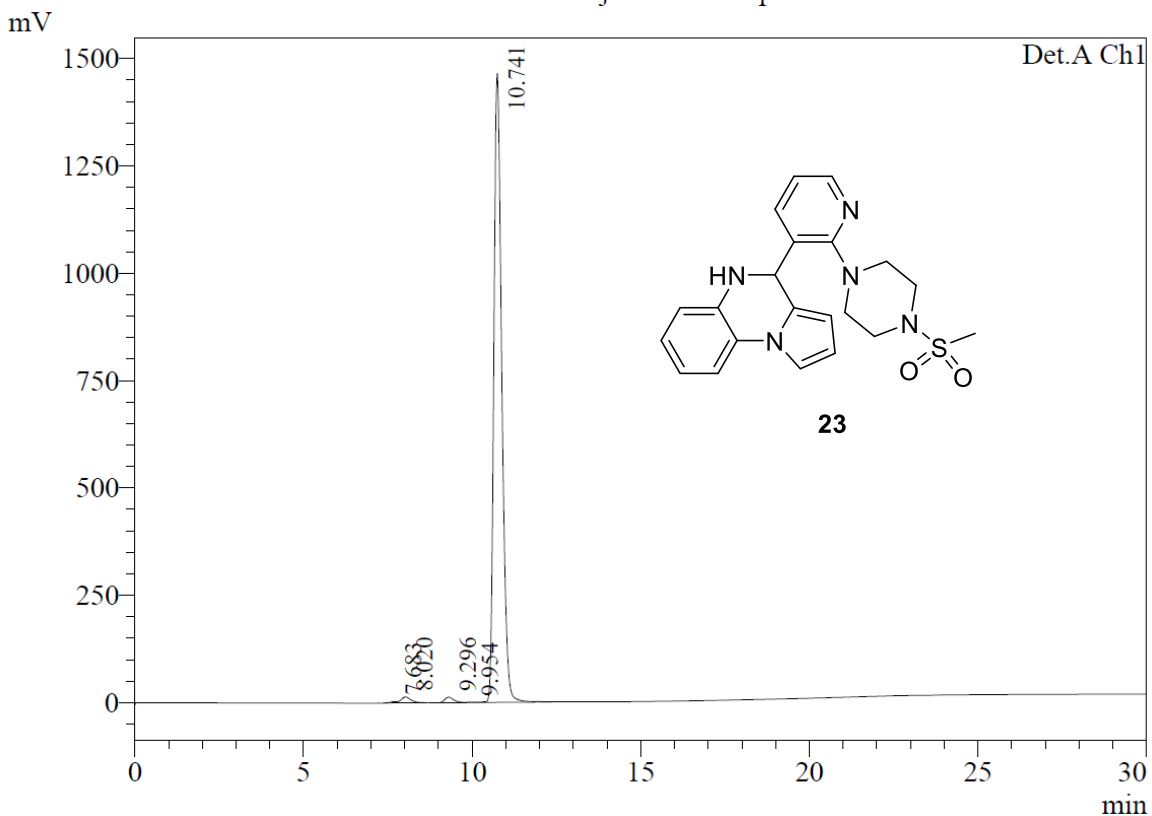

PeakTable

Detector A Ch1 254nm

| Peak# | Ret. Time | Area     | Area %  | Height % |
|-------|-----------|----------|---------|----------|
| 1     | 7.683     | 34328    | 0.140   | 0.183    |
| 2     | 8.020     | 274940   | 1.120   | 0.929    |
| 3     | 9.296     | 244484   | 0.996   | 0.879    |
| 4     | 9.954     | 16582    | 0.068   | 0.064    |
| 5     | 10.741    | 23986098 | 97.677  | 97.946   |
| Total |           | 24556432 | 100.000 | 100.000  |

Chromatogram  
 GL0738-1 C:\LabSolutions\Data\Project1\GL0738-1.lcd

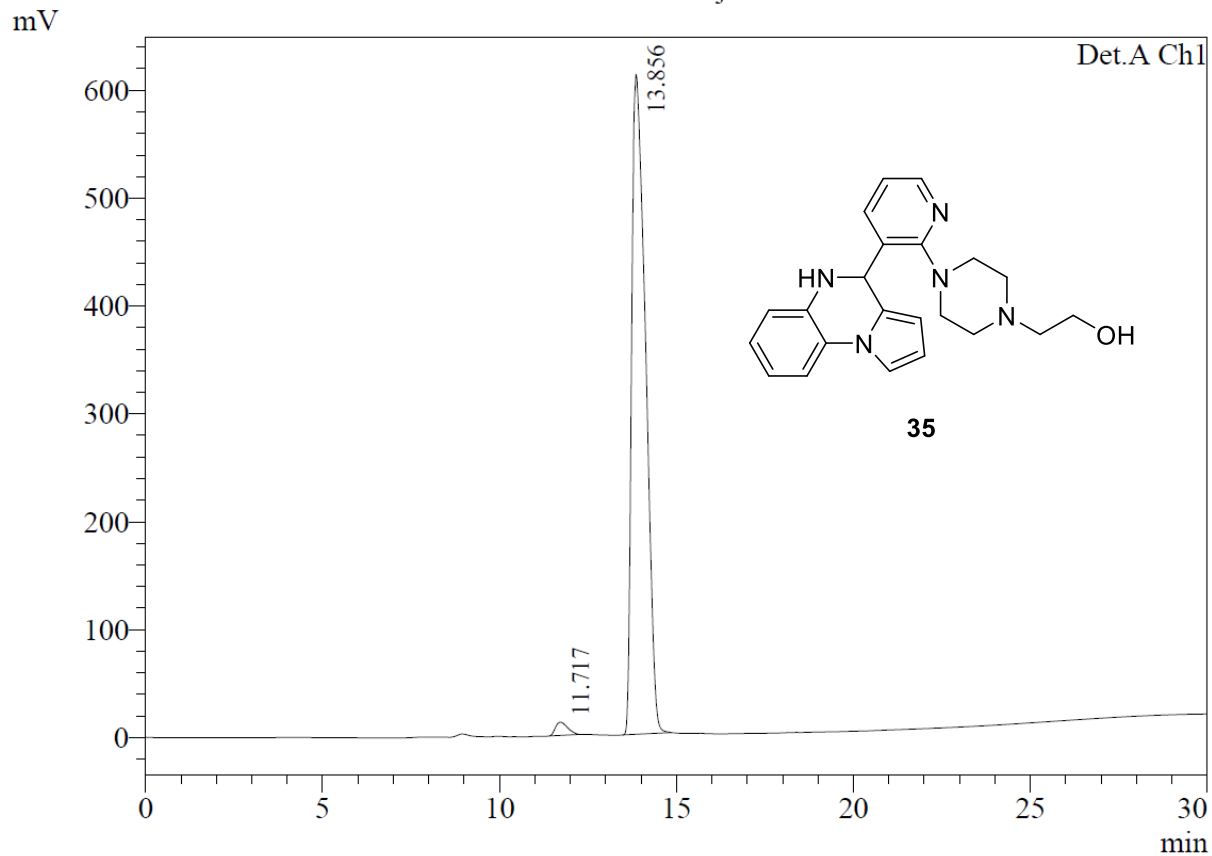

PeakTable

Detector A Ch1 254nm

| Peak# | Ret. Time | Area     | Area %  | Height % |
|-------|-----------|----------|---------|----------|
| 1     | 11.717    | 295977   | 1.743   | 1.962    |
| 2     | 13.856    | 16682491 | 98.257  | 98.038   |
| Total |           | 16978468 | 100.000 | 100.000  |

Chromatogram  
 GL0752-1 C:\LabSolutions\Data\Project1\GL0752-1.lcd

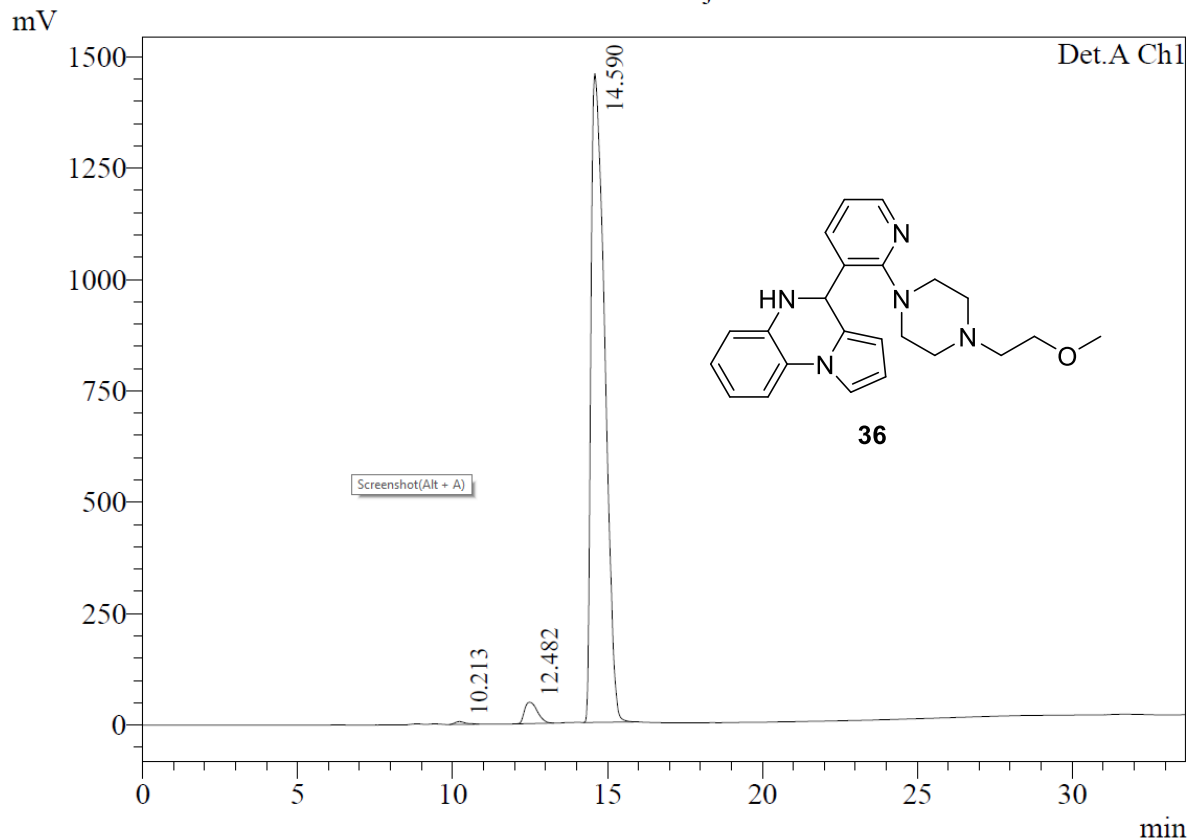

PeakTable

Detector A Ch1 254nm

| Peak# | Ret. Time | Area     | Area %  | Height % |
|-------|-----------|----------|---------|----------|
| 1     | 10.213    | 144902   | 0.312   | 0.410    |
| 2     | 12.482    | 1388254  | 2.988   | 3.171    |
| 3     | 14.590    | 44928503 | 96.700  | 96.419   |
| Total |           | 46461659 | 100.000 | 100.000  |

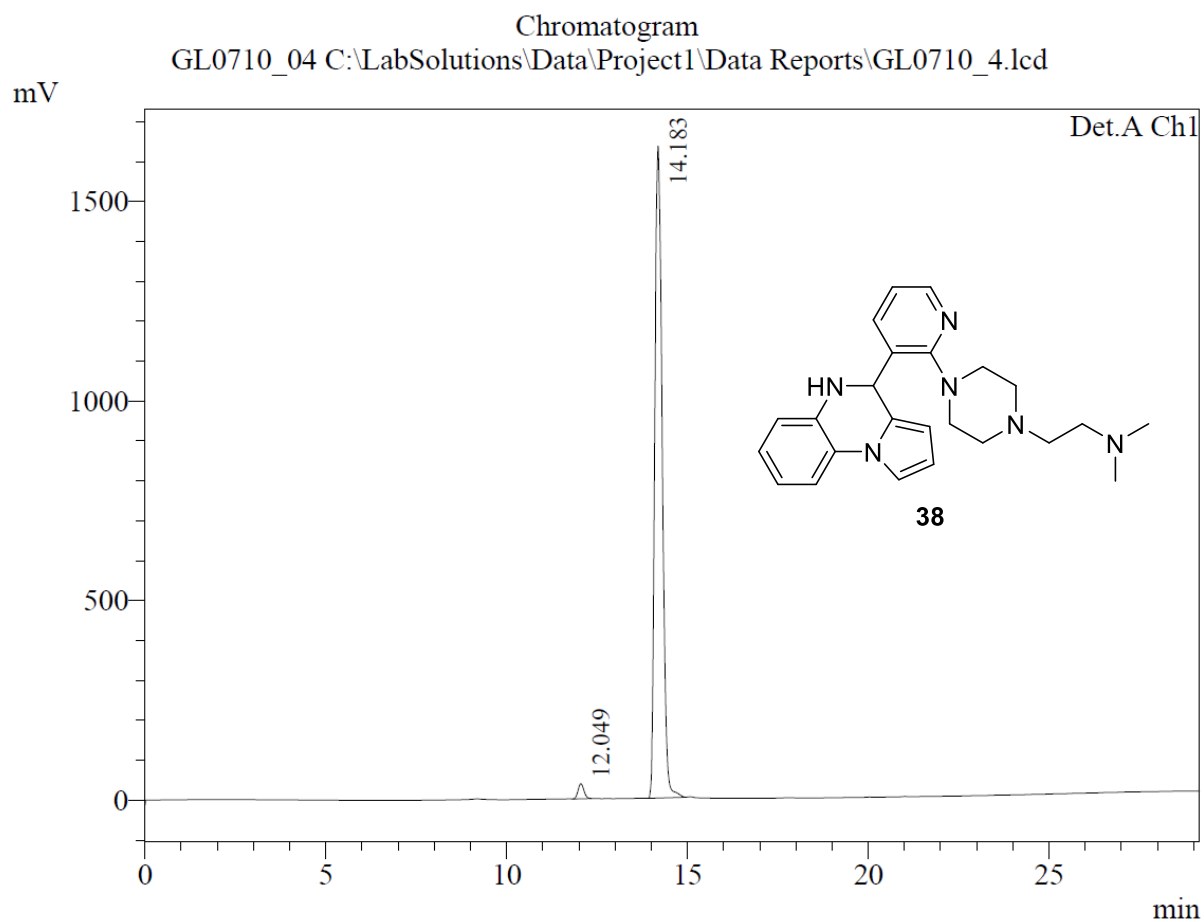

PeakTable

Detector A Ch1 254nm

| Peak# | Ret. Time | Area     | Area %  | Height % |
|-------|-----------|----------|---------|----------|
| 1     | 12.049    | 426221   | 1.789   | 2.262    |
| 2     | 14.183    | 23391900 | 98.211  | 97.738   |
| Total |           | 23818121 | 100.000 | 100.000  |

Chromatogram  
 GL0746-1 C:\LabSolutions\Data\Project1\GL0746-1.lcd

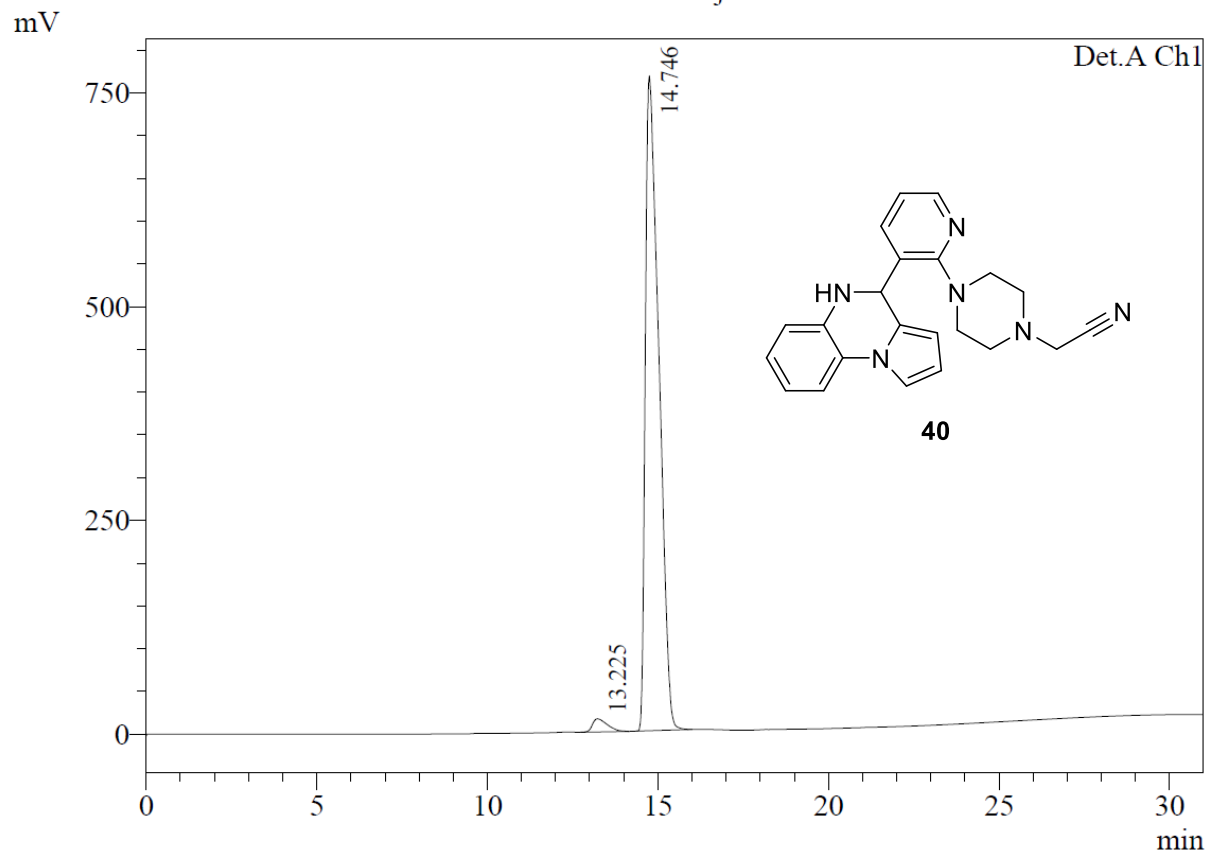

PeakTable

Detector A Ch1 254nm

| Peak# | Ret. Time | Area     | Area %  | Height % |
|-------|-----------|----------|---------|----------|
| 1     | 13.225    | 465046   | 2.165   | 1.979    |
| 2     | 14.746    | 21018376 | 97.835  | 98.021   |
| Total |           | 21483422 | 100.000 | 100.000  |

Chromatogram  
 GL0797-1 C:\LabSolutions\Data\Project1\GL0797-1.lcd

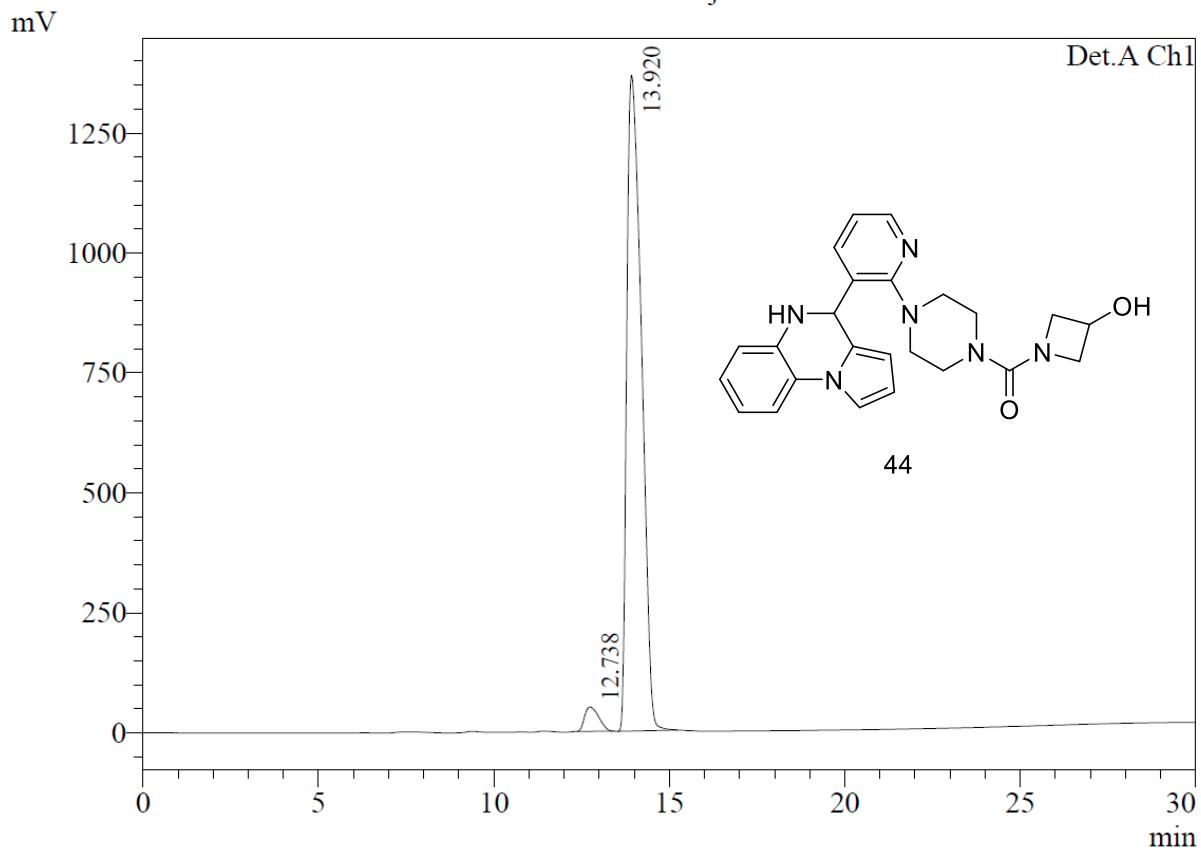

PeakTable

Detector A Ch1 254nm

| Peak# | Ret. Time | Area     | Area %  | Height % |
|-------|-----------|----------|---------|----------|
| 1     | 12.738    | 1425876  | 3.463   | 3.576    |
| 2     | 13.920    | 39745283 | 96.537  | 96.424   |
| Total |           | 41171159 | 100.000 | 100.000  |



Chromatogram  
 GL0822-1 C:\LabSolutions\Data\Project1\GL0822-2.lcd

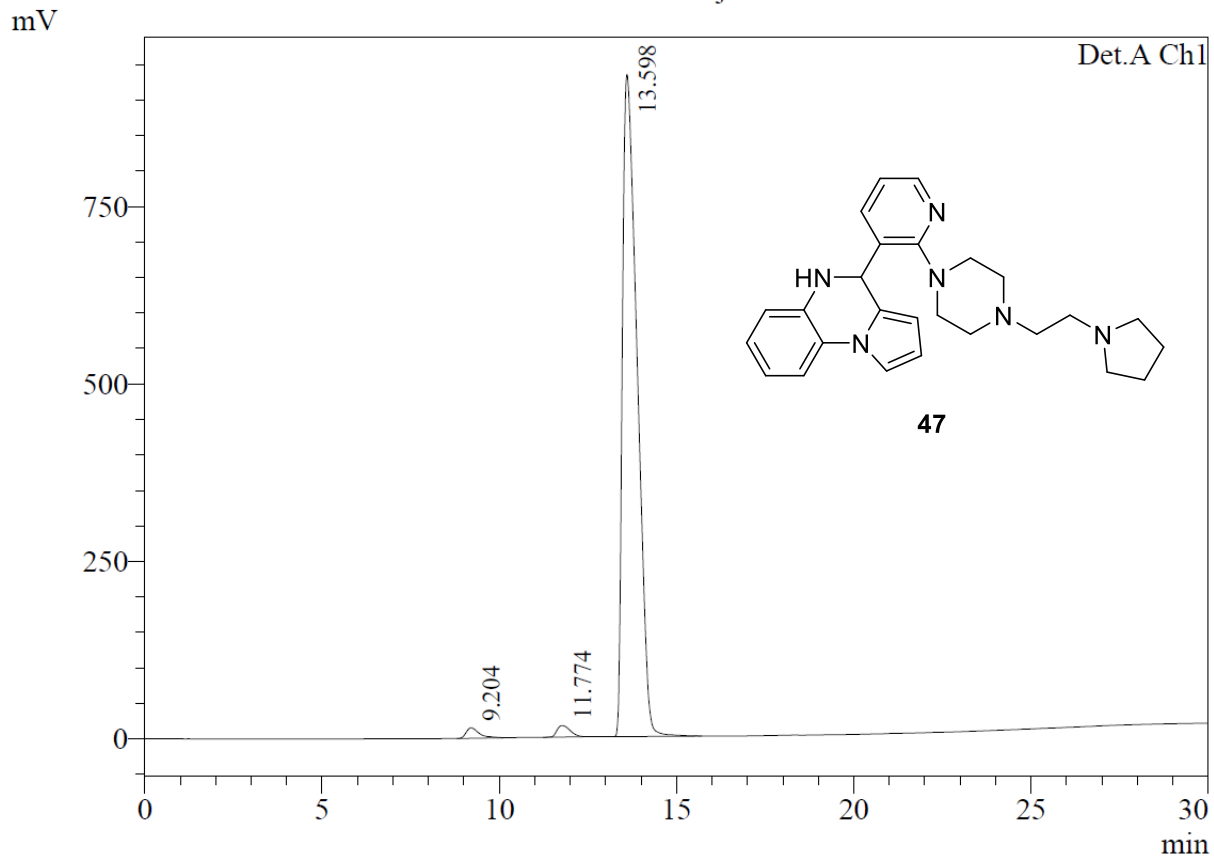

PeakTable

Detector A Ch1 254nm

| Peak# | Ret. Time | Area     | Area %  | Height % |
|-------|-----------|----------|---------|----------|
| 1     | 9.204     | 383111   | 1.385   | 1.532    |
| 2     | 11.774    | 418190   | 1.511   | 1.671    |
| 3     | 13.598    | 26868955 | 97.104  | 96.797   |
| Total |           | 27670256 | 100.000 | 100.000  |

Chromatogram  
 GL0821-1 C:\LabSolutions\Data\Project1\GL0821-1.lcd

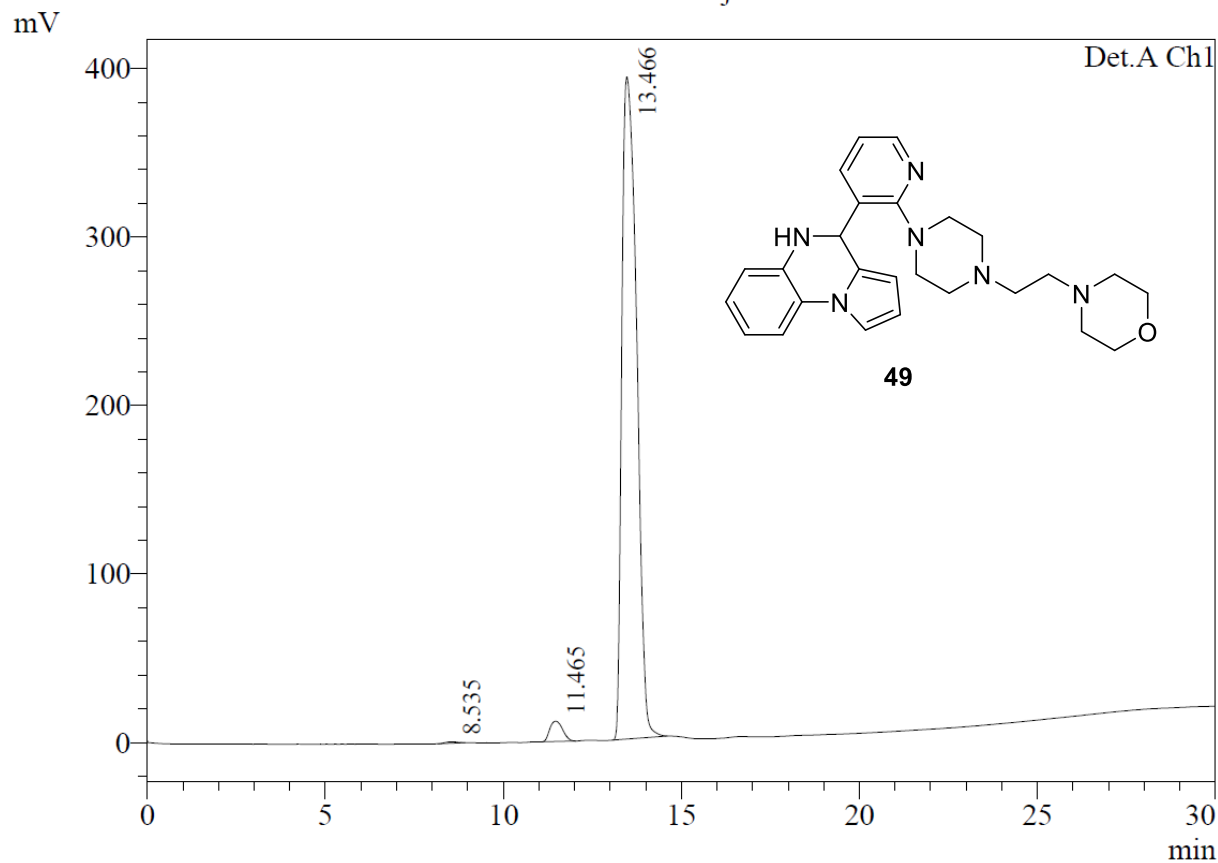

PeakTable

Detector A Ch1 254nm

| Peak# | Ret. Time | Area     | Area %  | Height % |
|-------|-----------|----------|---------|----------|
| 1     | 8.535     | 21487    | 0.184   | 0.223    |
| 2     | 11.465    | 302967   | 2.600   | 2.966    |
| 3     | 13.466    | 11326243 | 97.215  | 96.810   |
| Total |           | 11650697 | 100.000 | 100.000  |

Chromatogram  
 GL0798 C:\LabSolutions\Data\Project1\Data Reports\GL798.lcd

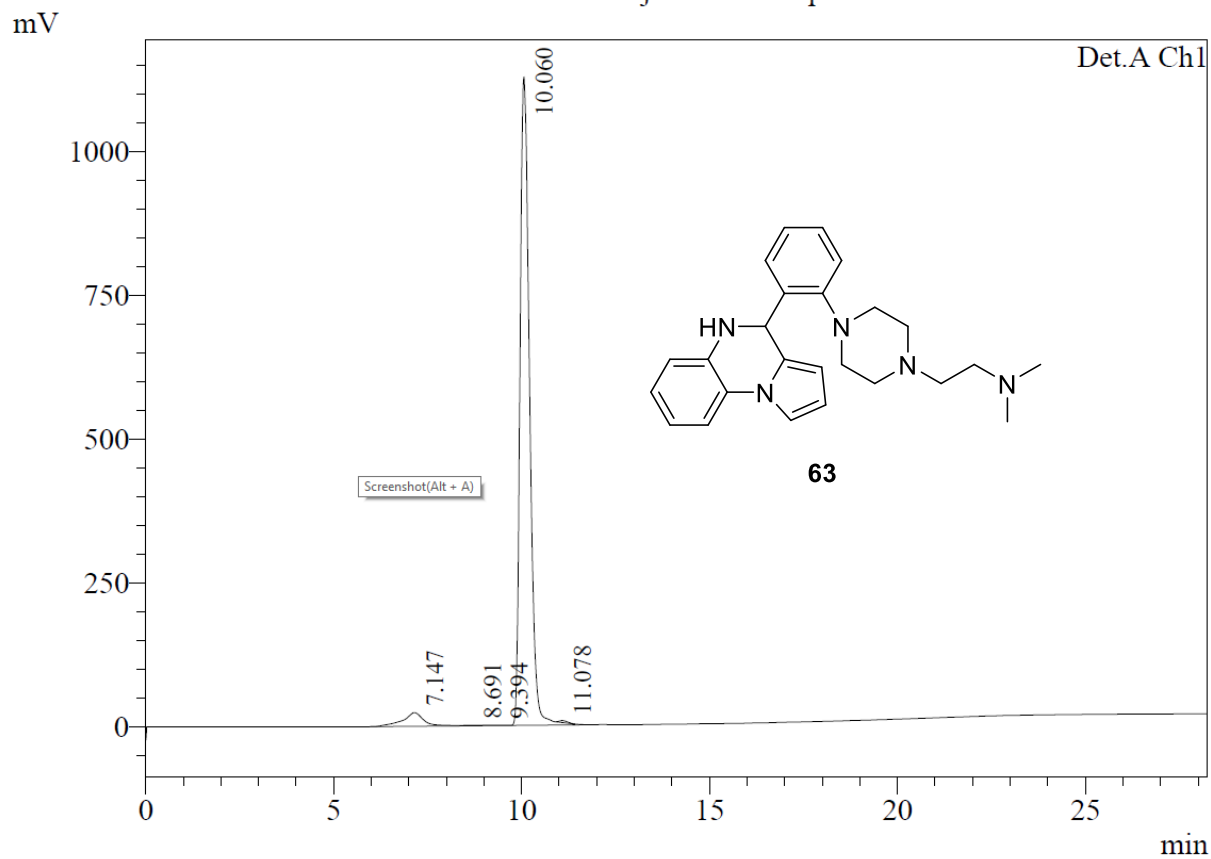

PeakTable

Detector A Ch1 254nm

| Peak# | Ret. Time | Area     | Area %  | Height % |
|-------|-----------|----------|---------|----------|
| 1     | 7.147     | 929817   | 4.458   | 2.057    |
| 2     | 8.691     | 40083    | 0.192   | 0.107    |
| 3     | 9.394     | 19511    | 0.094   | 0.073    |
| 4     | 10.060    | 19815793 | 95.002  | 97.469   |
| 5     | 11.078    | 53022    | 0.254   | 0.293    |
| Total |           | 20858225 | 100.000 | 100.000  |

Chromatogram  
 GL0790 C:\LabSolutions\Data\Project1\Data Reports\GL790.lcd

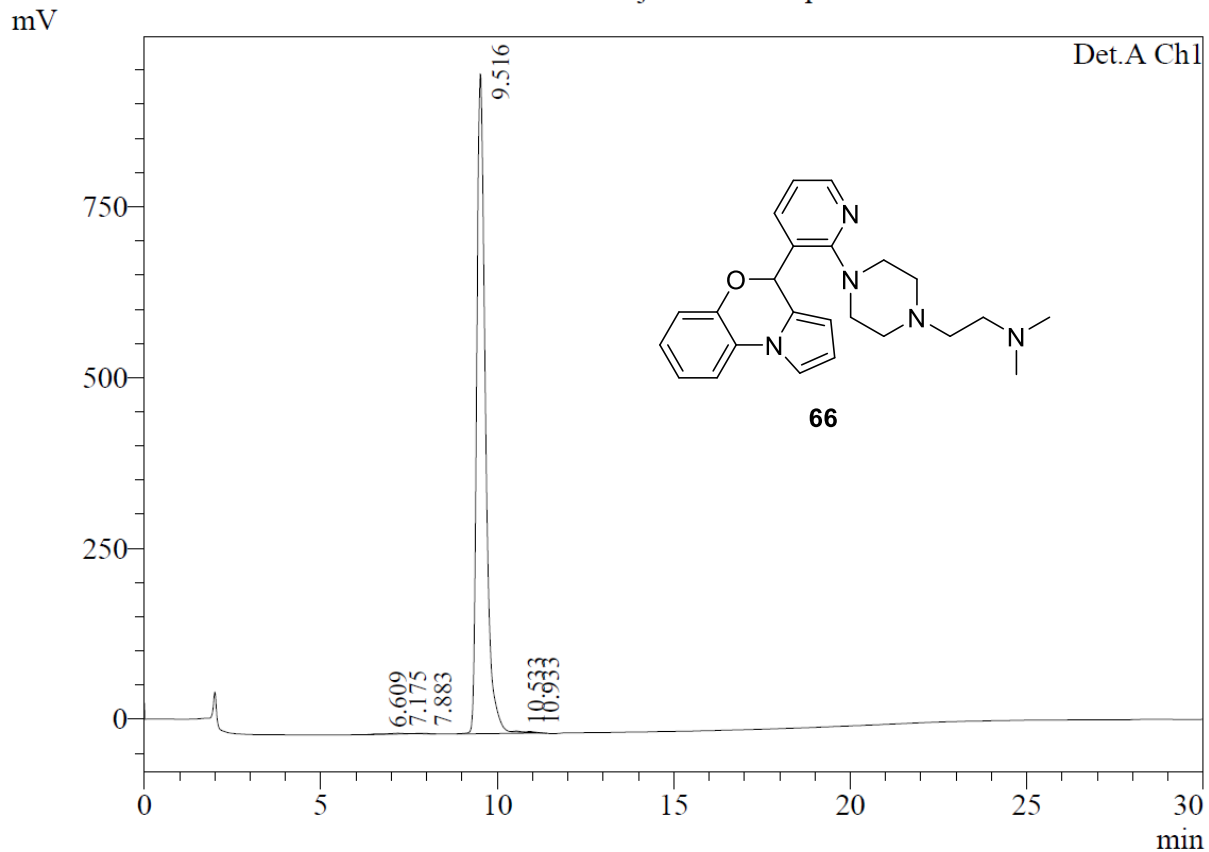

PeakTable

Detector A Ch1 254nm

| Peak# | Ret. Time | Area     | Area %  | Height % |
|-------|-----------|----------|---------|----------|
| 1     | 6.609     | 20782    | 0.124   | 0.108    |
| 2     | 7.175     | 28352    | 0.169   | 0.119    |
| 3     | 7.883     | 11248    | 0.067   | 0.073    |
| 4     | 9.516     | 16703045 | 99.450  | 99.448   |
| 5     | 10.533    | 11928    | 0.071   | 0.114    |
| 6     | 10.933    | 19980    | 0.119   | 0.138    |
| Total |           | 16795335 | 100.000 | 100.000  |

Chromatogram  
 GL0959-1 C:\LabSolutions\Data\Project1\GL0959-1.lcd

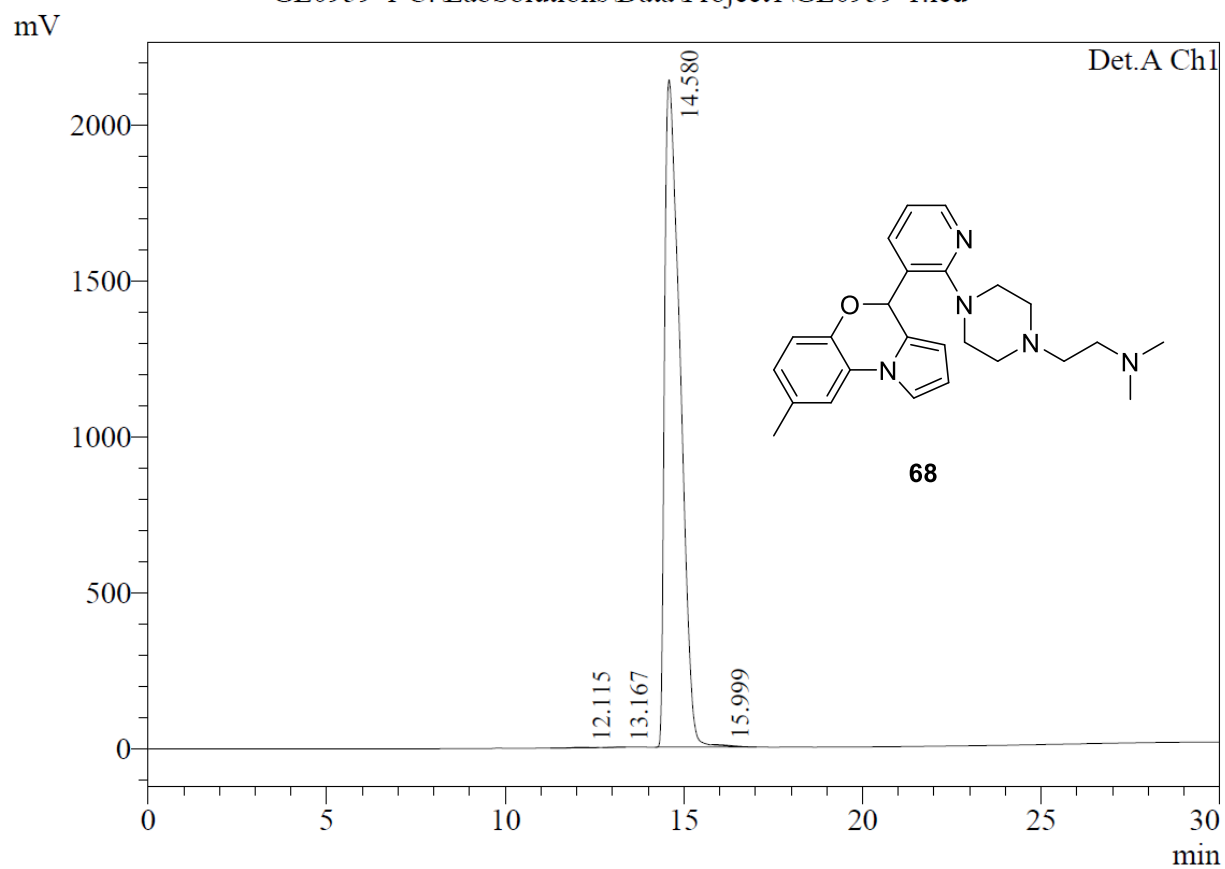

PeakTable

Detector A Ch1 254nm

| Peak# | Ret. Time | Area     | Area %  | Height % |
|-------|-----------|----------|---------|----------|
| 1     | 12.115    | 72612    | 0.112   | 0.112    |
| 2     | 13.167    | 19841    | 0.030   | 0.039    |
| 3     | 14.580    | 64922240 | 99.770  | 99.741   |
| 4     | 15.999    | 56921    | 0.087   | 0.108    |
| Total |           | 65071615 | 100.000 | 100.000  |

Chromatogram  
 GL0961-1 C:\LabSolutions\Data\Project1\GL0961-1.lcd

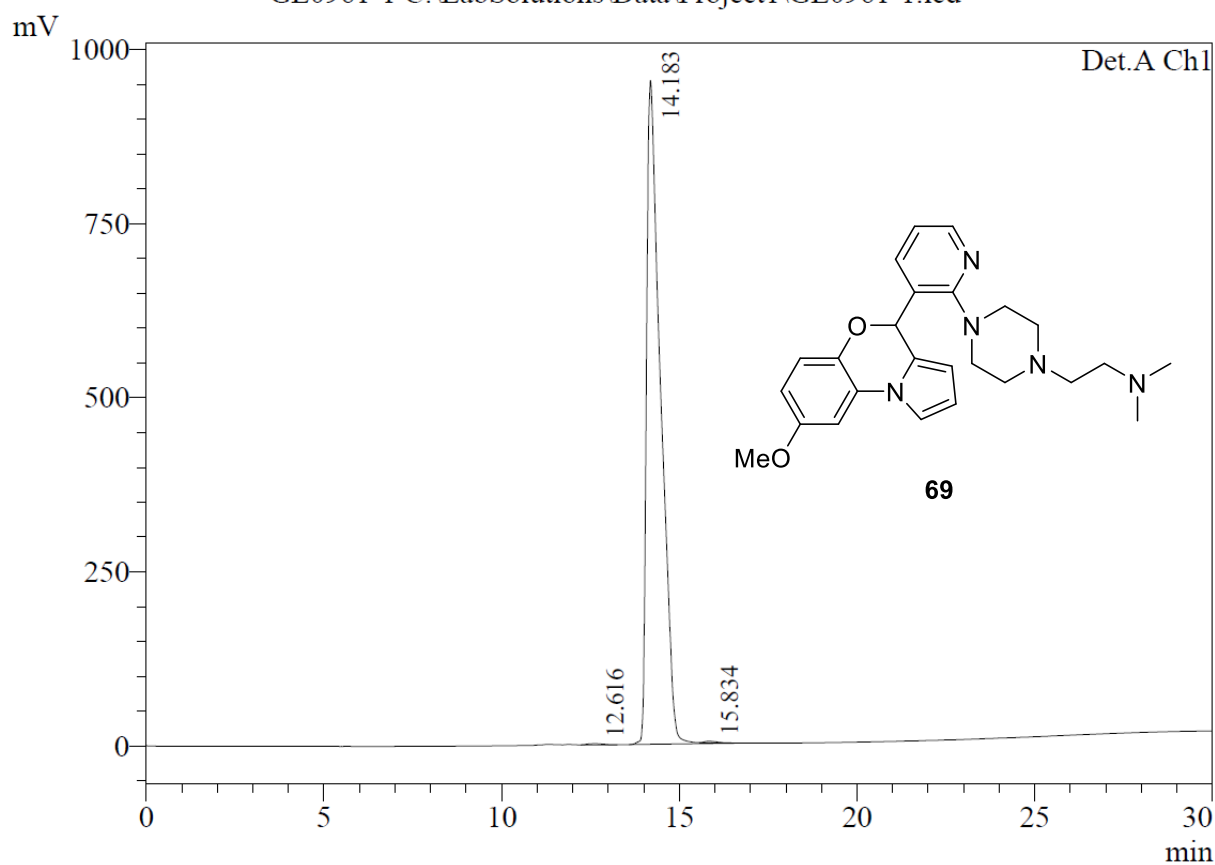

PeakTable

Detector A Ch1 254nm

| Peak# | Ret. Time | Area     | Area %  | Height % |
|-------|-----------|----------|---------|----------|
| 1     | 12.616    | 52695    | 0.201   | 0.179    |
| 2     | 14.183    | 26165136 | 99.574  | 99.568   |
| 3     | 15.834    | 59332    | 0.226   | 0.253    |
| Total |           | 26277163 | 100.000 | 100.000  |

Chromatogram  
 GL0964-1 C:\LabSolutions\Data\Project1\GL0964-1.lcd

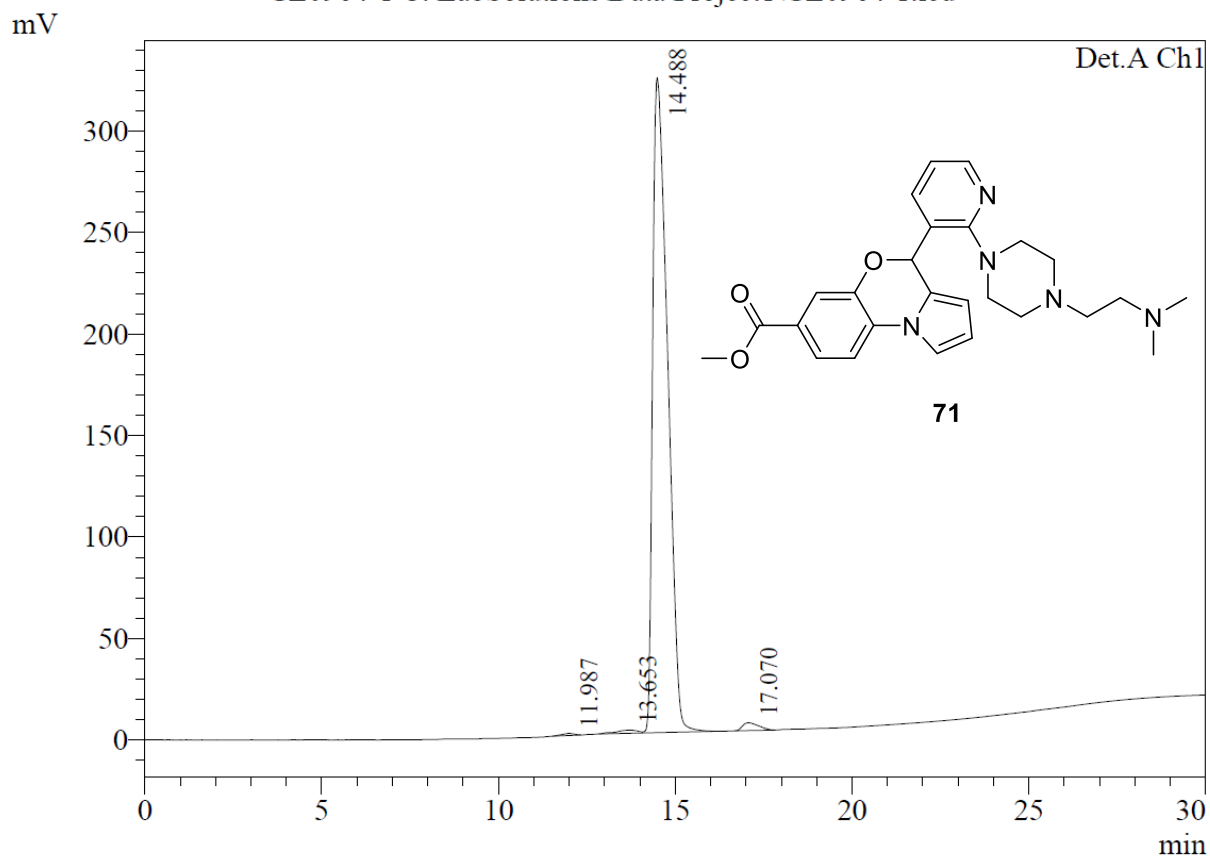

PeakTable

Detector A Ch1 254nm

| Peak# | Ret. Time | Area    | Area %  | Height % |
|-------|-----------|---------|---------|----------|
| 1     | 11.987    | 24640   | 0.254   | 0.298    |
| 2     | 13.653    | 66258   | 0.683   | 0.470    |
| 3     | 14.488    | 9483415 | 97.809  | 98.059   |
| 4     | 17.070    | 121561  | 1.254   | 1.174    |
| Total |           | 9695875 | 100.000 | 100.000  |

Chromatogram  
 GL0967-1 C:\LabSolutions\Data\Project1\GL0967-1.lcd

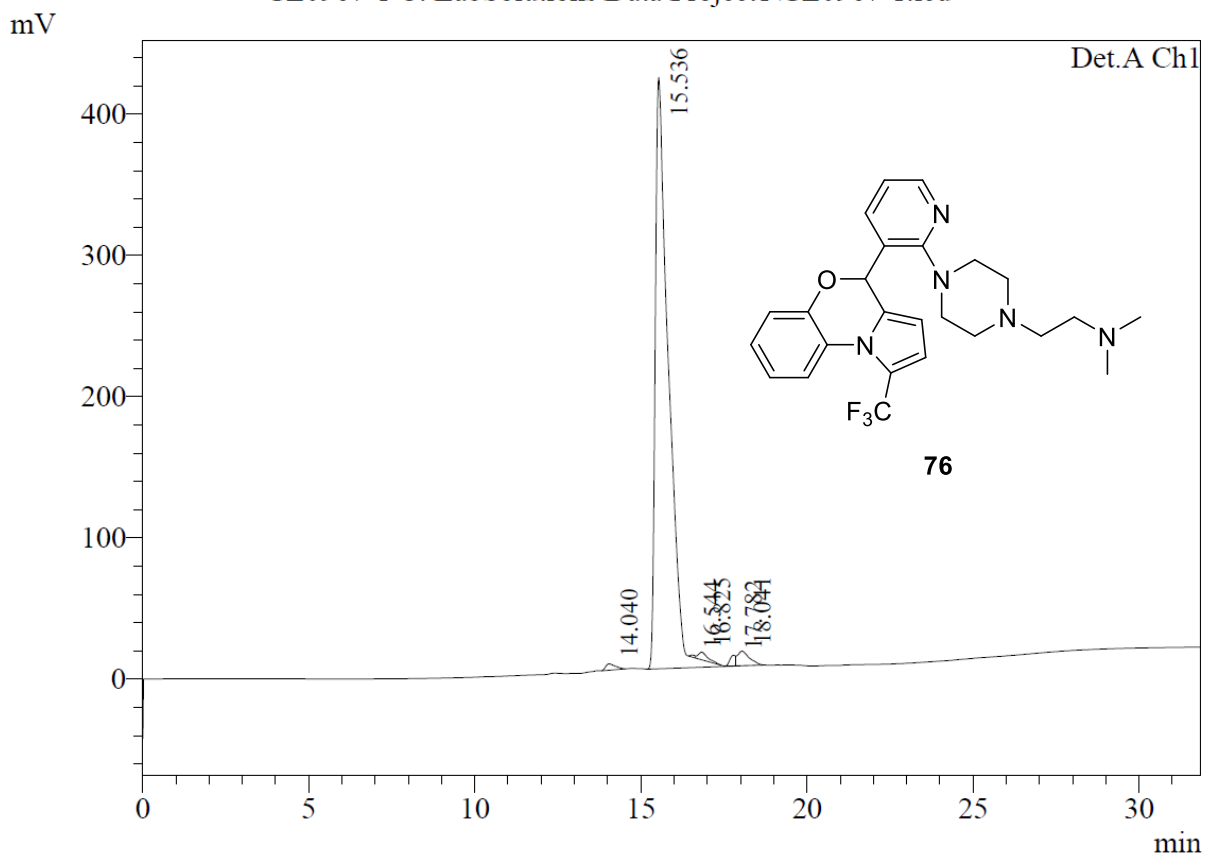

PeakTable

Detector A Ch1 254nm

| Peak# | Ret. Time | Area     | Area %  | Height % |
|-------|-----------|----------|---------|----------|
| 1     | 14.040    | 91786    | 0.752   | 1.000    |
| 2     | 15.536    | 11655759 | 95.435  | 93.527   |
| 3     | 16.544    | 15090    | 0.124   | 0.326    |
| 4     | 16.825    | 108463   | 0.888   | 1.198    |
| 5     | 17.782    | 83258    | 0.682   | 1.658    |
| 6     | 18.041    | 258891   | 2.120   | 2.289    |
| Total |           | 12213247 | 100.000 | 100.000  |



# Copies of NMR spectra

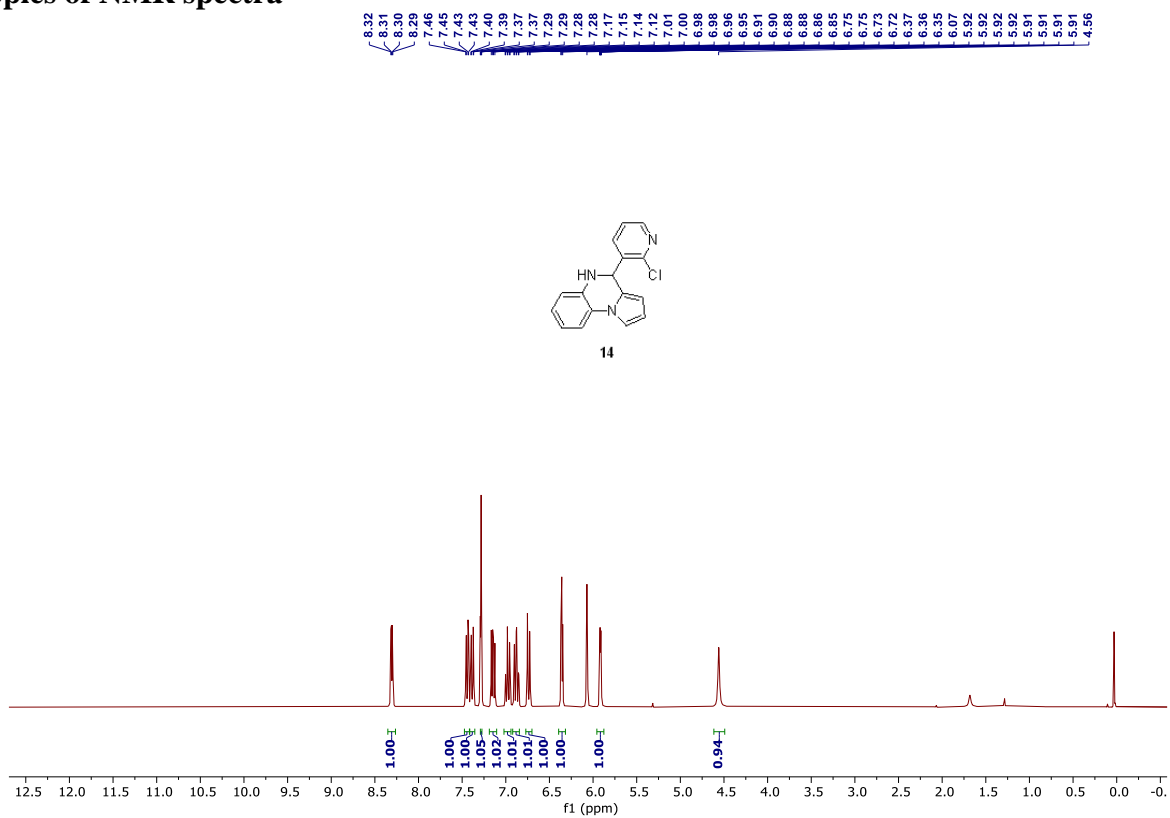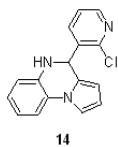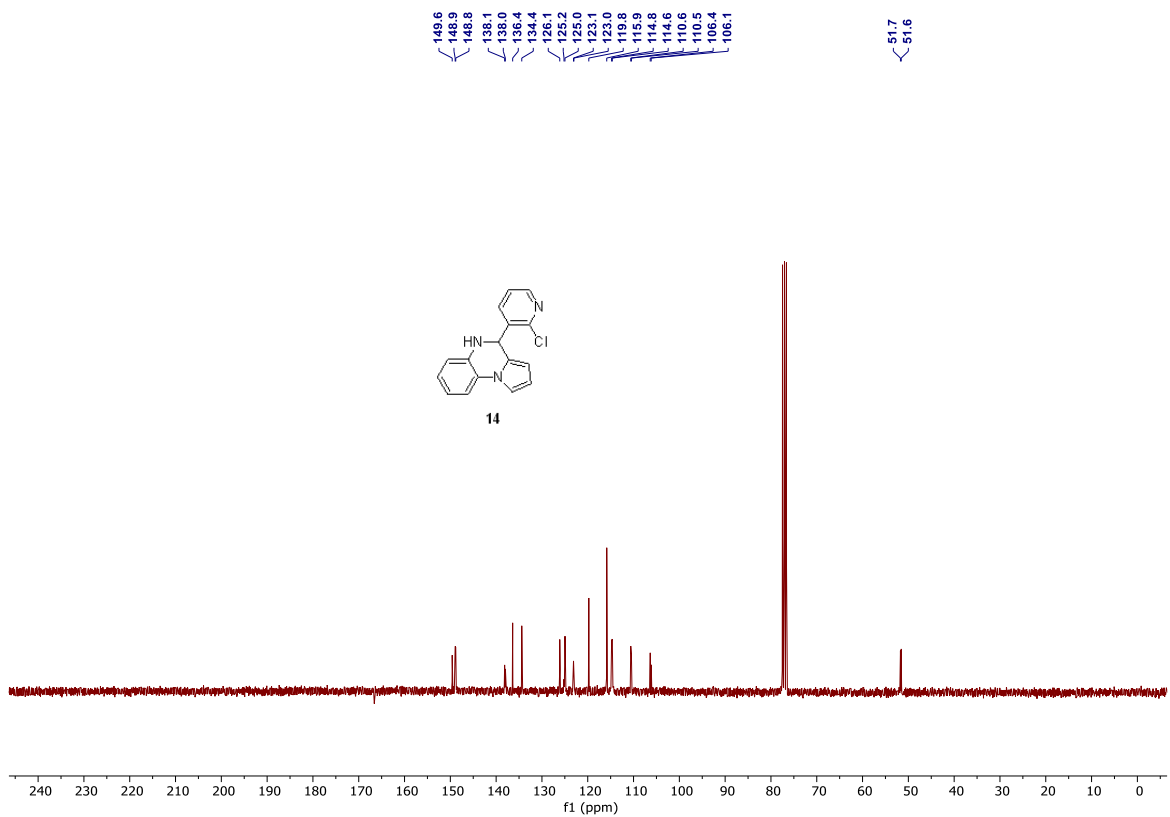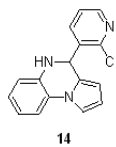

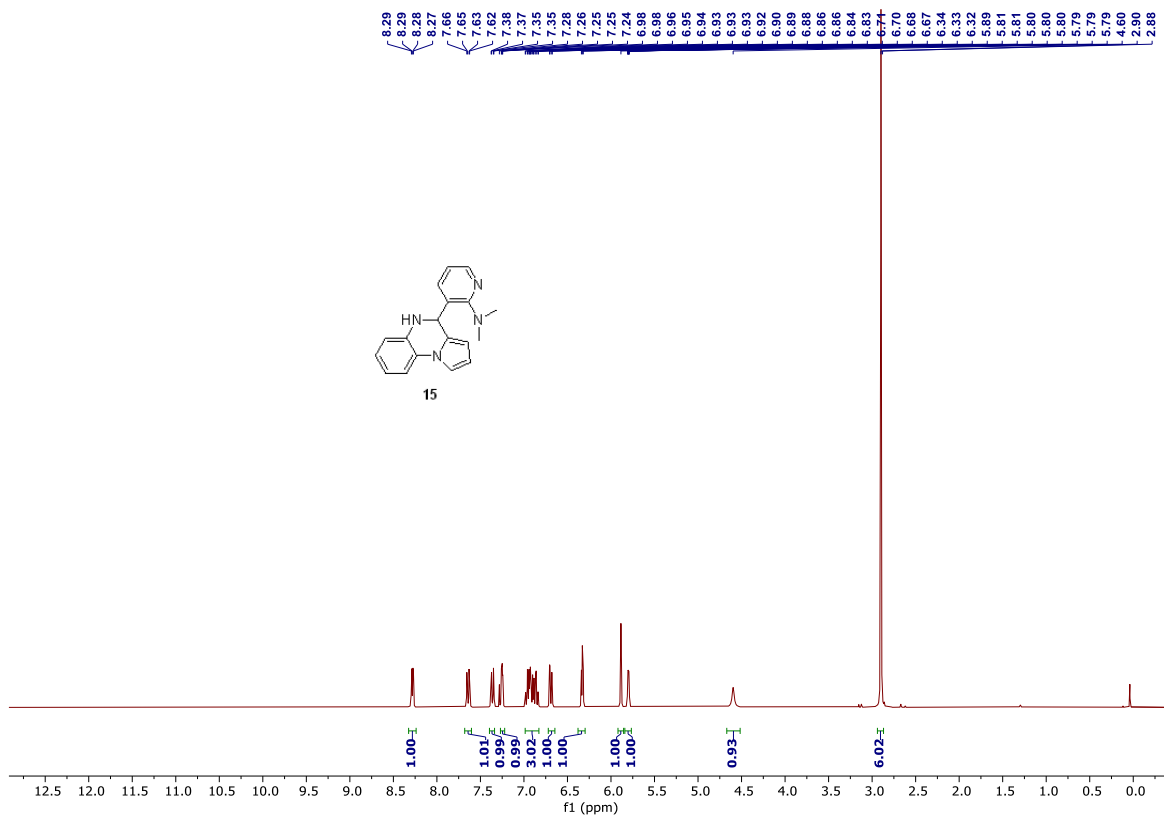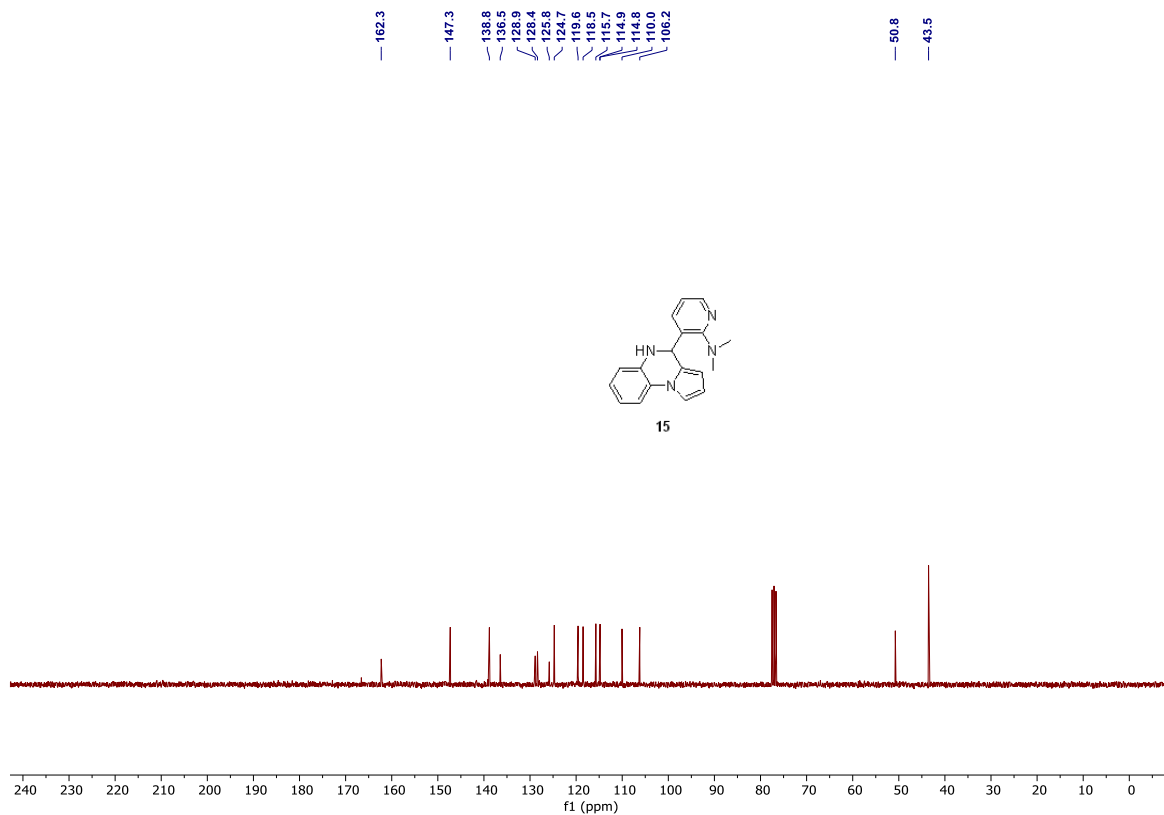

8.19  
8.18  
8.18  
8.16  
8.16  
7.44  
7.43  
7.41  
7.40  
7.36  
7.35  
7.33  
7.33  
7.24  
7.24  
7.23  
7.23  
6.96  
6.95  
6.93  
6.93  
6.85  
6.85  
6.85  
6.74  
6.73  
6.71  
6.70  
6.69  
6.68  
6.67  
6.65  
6.65  
6.34  
6.33  
6.32  
5.85  
5.85  
5.85  
5.85  
5.84  
5.84  
5.84  
5.83  
4.44  
4.29  
4.27  
4.10  
4.08  
2.37  
2.34  
2.34

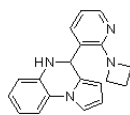

16

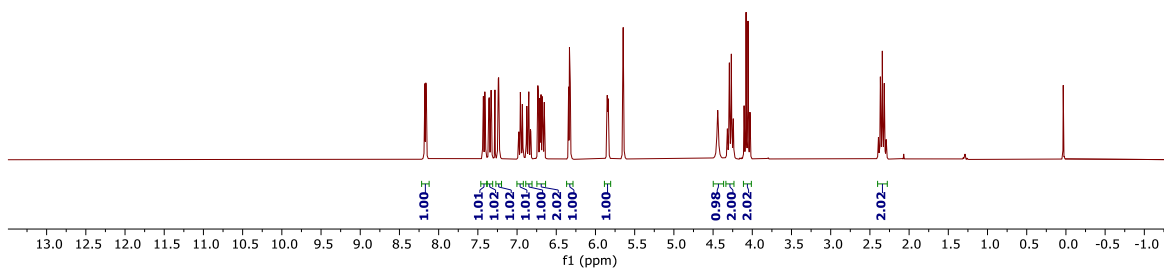

156.9  
147.3  
137.6  
135.8  
128.6  
127.5  
127.7  
122.5  
119.5  
115.9  
114.9  
114.7  
114.6  
110.1  
106.4  
52.9  
50.5  
17.2

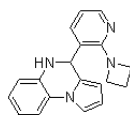

16

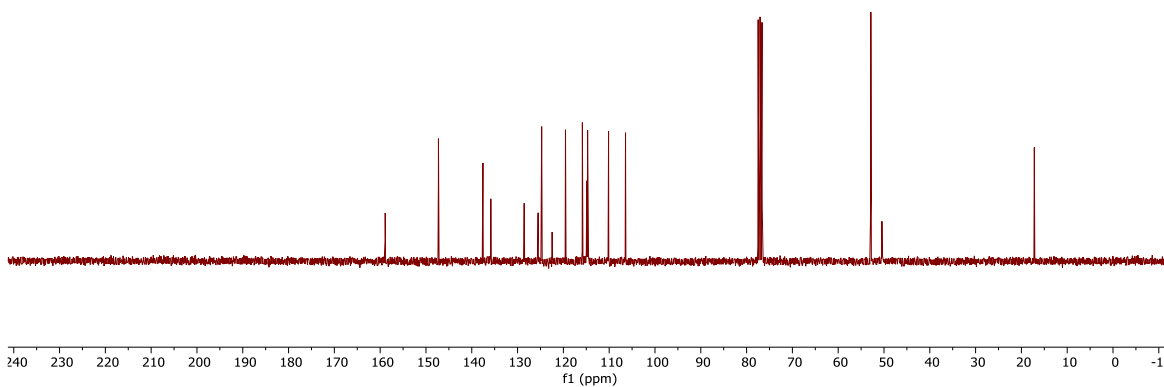

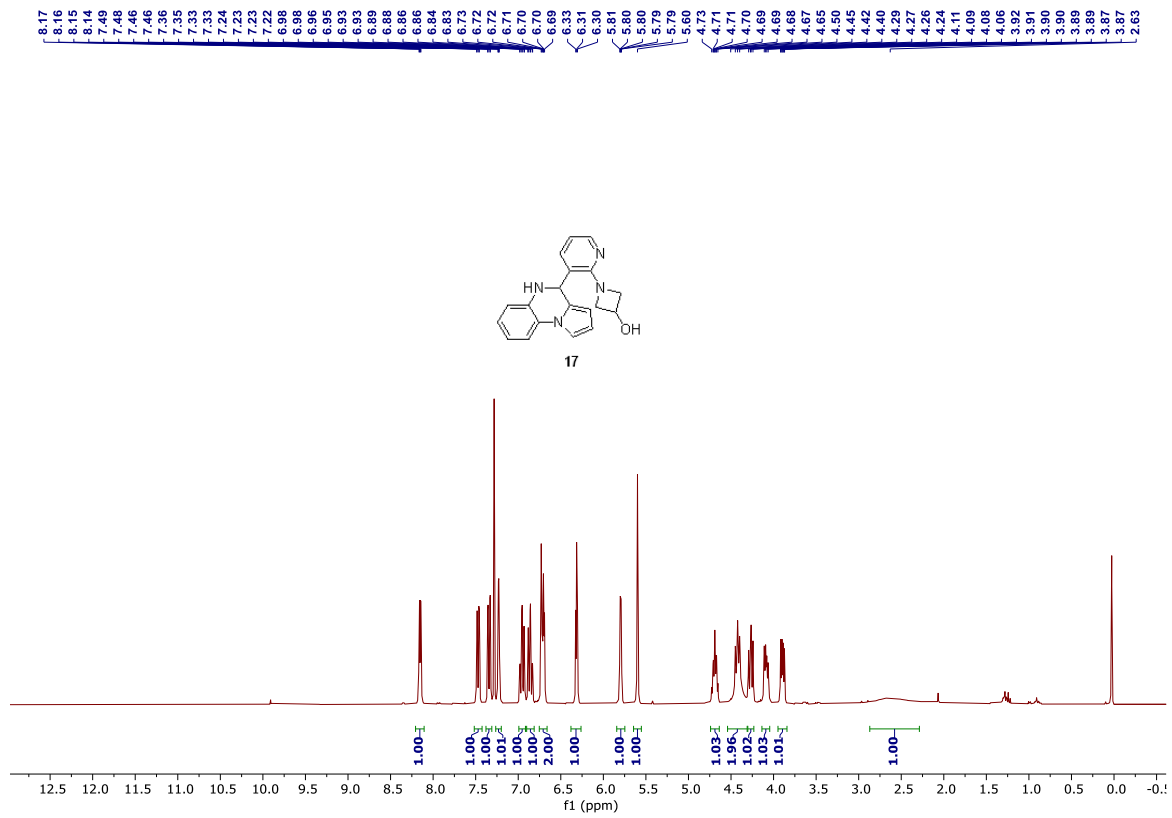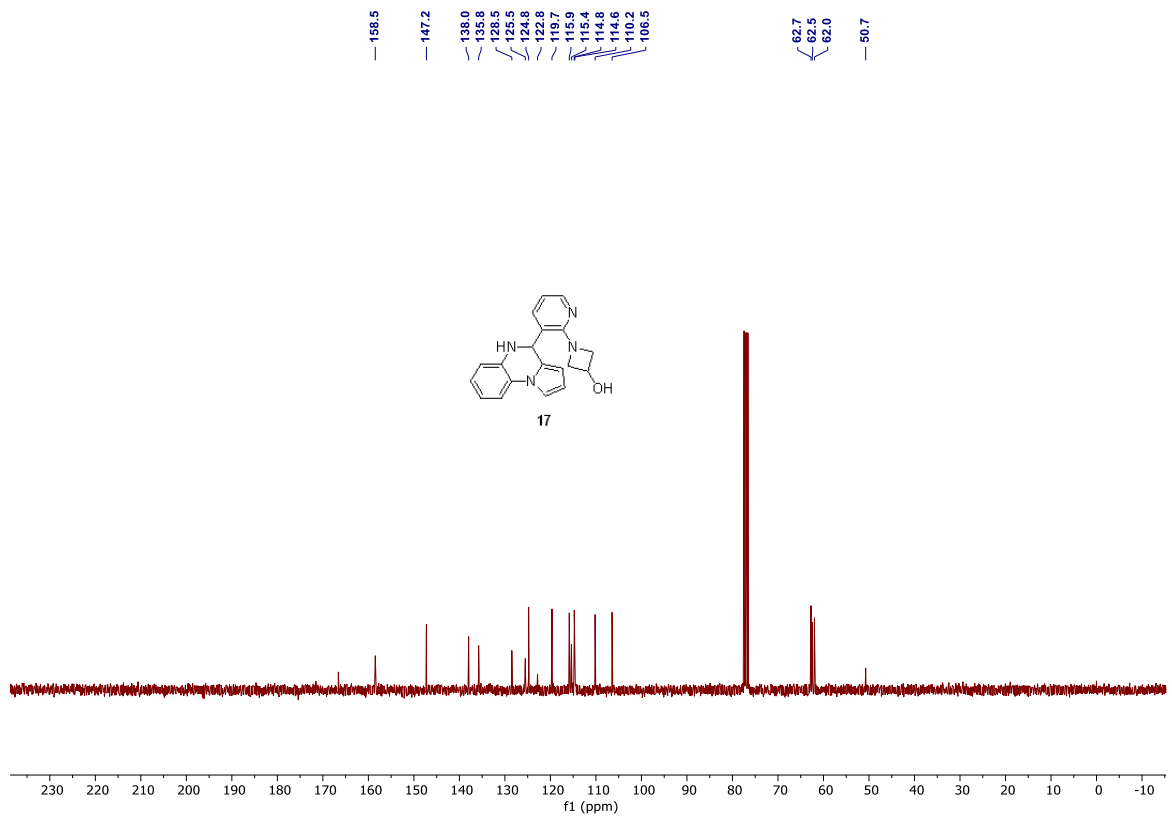

8.20 8.19 8.18 8.18 8.18 7.87 7.86 7.85 7.84 7.83 7.37 7.34 7.34 7.24 7.24 7.23 7.23 6.87 6.86 6.84 6.89 6.89 6.87 6.87 6.97 6.76 6.75 6.73 6.73 6.72 6.70 6.70 6.34 6.33 6.32 5.84 5.83 5.82 5.82 5.71 3.72 3.70 3.69 3.68 3.67 3.66 3.64 3.45 3.45 3.44 3.43 3.42 3.42 3.40 3.40 3.39 3.38 2.01 2.00 1.99 1.99 1.98 1.98 1.86 1.86 1.84 1.84 1.83 1.82 1.82 1.80 1.80 1.88 1.88 1.87 1.86

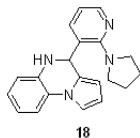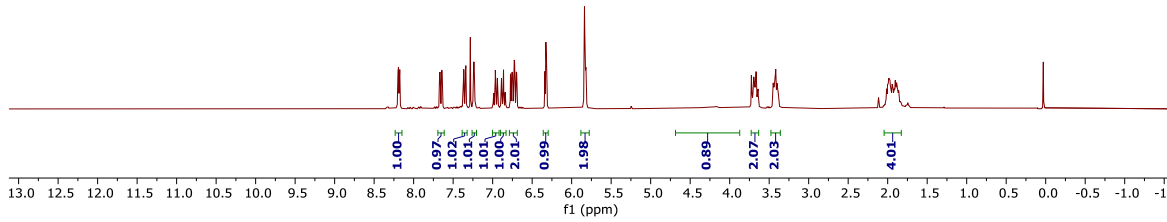

156.6 146.9 138.8 136.5 129.7 125.8 124.7 123.7 119.6 115.7 115.3 114.8 114.7 110.0 106.6 51.1 50.9 25.6

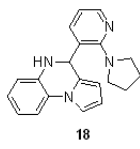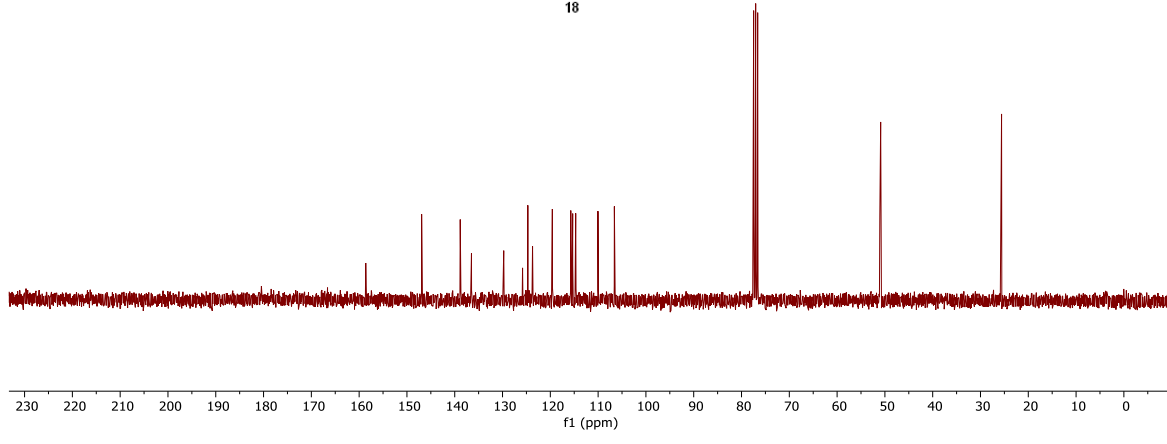

8.23  
8.22  
8.21  
7.54  
7.51  
7.51  
7.50  
7.34  
7.26  
7.25  
7.25  
7.24  
6.99  
6.98  
6.96  
6.94  
6.93  
6.88  
6.87  
6.86  
6.85  
6.85  
6.84  
6.83  
6.82  
6.73  
6.72  
6.70  
6.34  
6.33  
6.32  
5.83  
5.82  
5.82  
5.82  
5.81  
5.81  
3.66  
3.65  
3.64  
3.64  
3.63  
3.62  
3.61  
3.60  
3.59  
3.57  
3.50  
3.48  
3.46  
2.91  
2.89  
2.87  
2.83  
2.82  
2.82  
2.81  
2.79  
2.78  
2.77  
2.76  
2.46  
2.05  
2.04  
2.03  
2.01  
2.00  
1.99

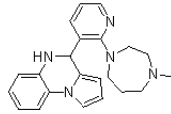

19

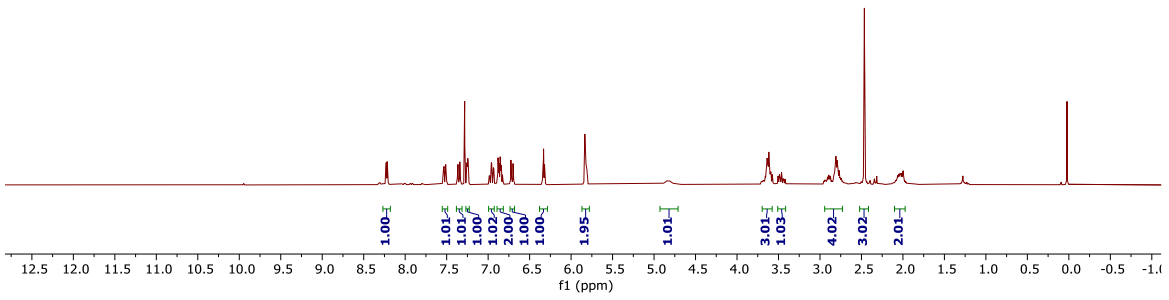

162.1  
147.1  
138.8  
136.2  
128.4  
127.9  
125.7  
124.7  
119.4  
118.1  
115.7  
114.8  
114.6  
110.1  
106.2  
58.6  
57.3  
53.4  
52.6  
50.9  
46.8  
28.0

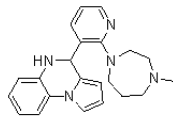

19

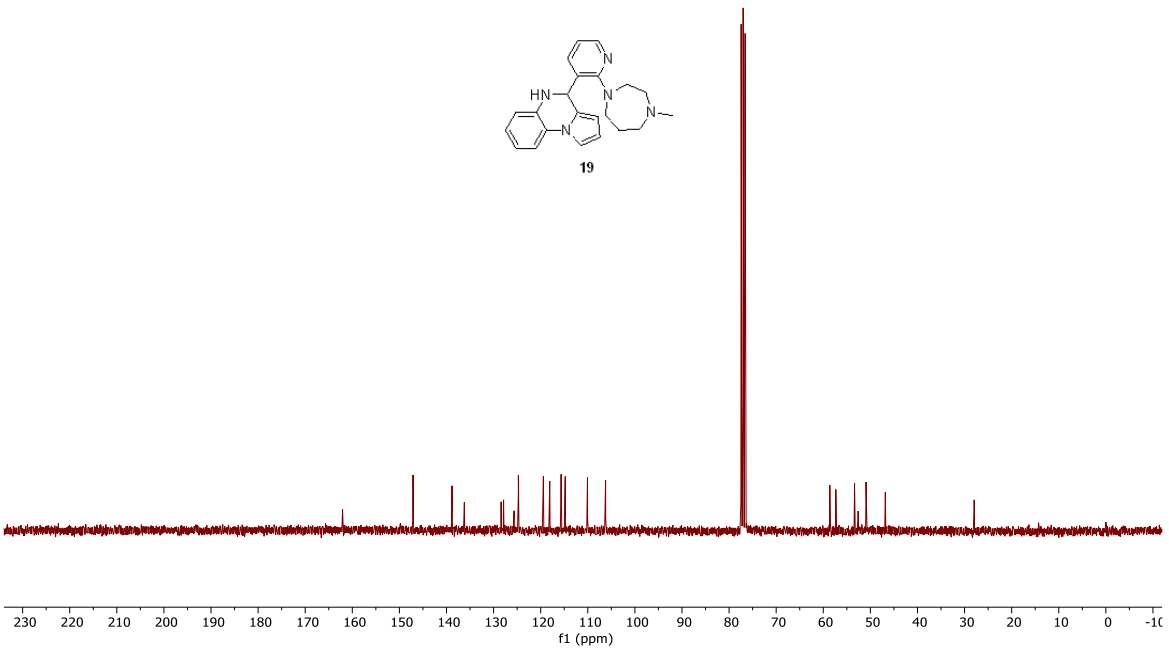

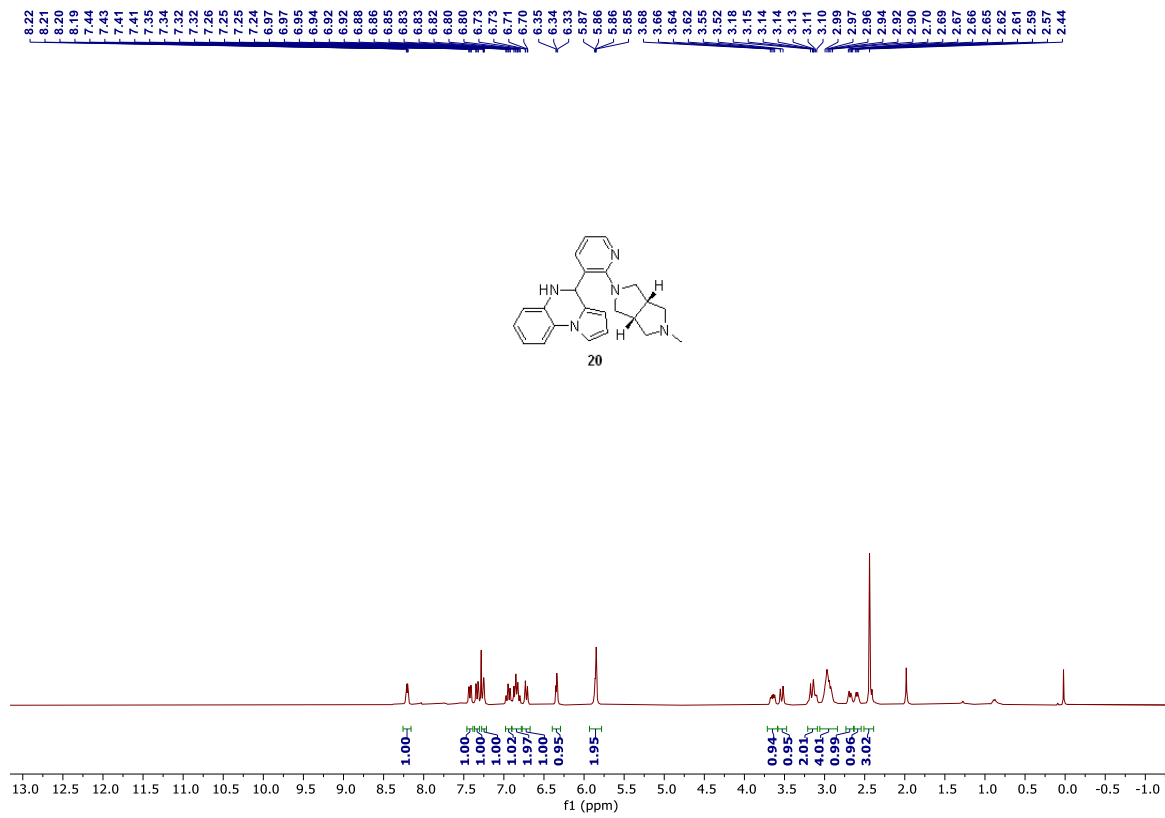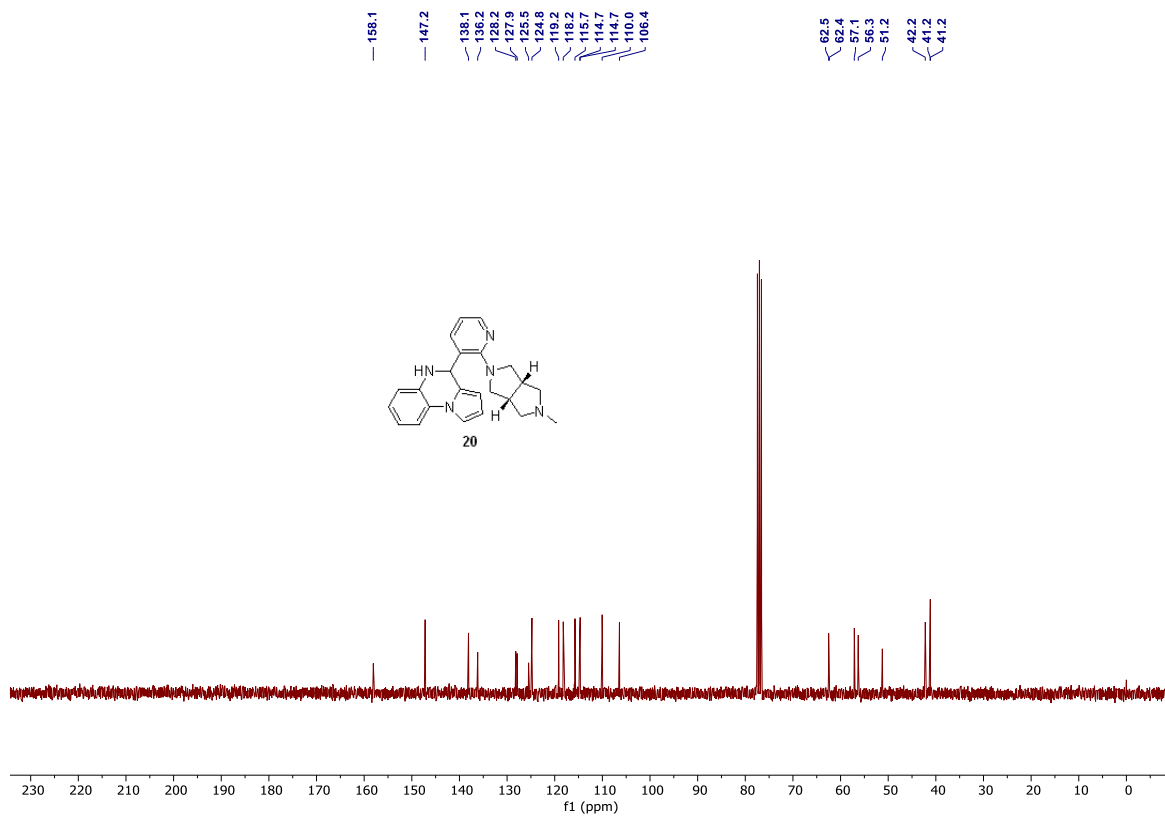

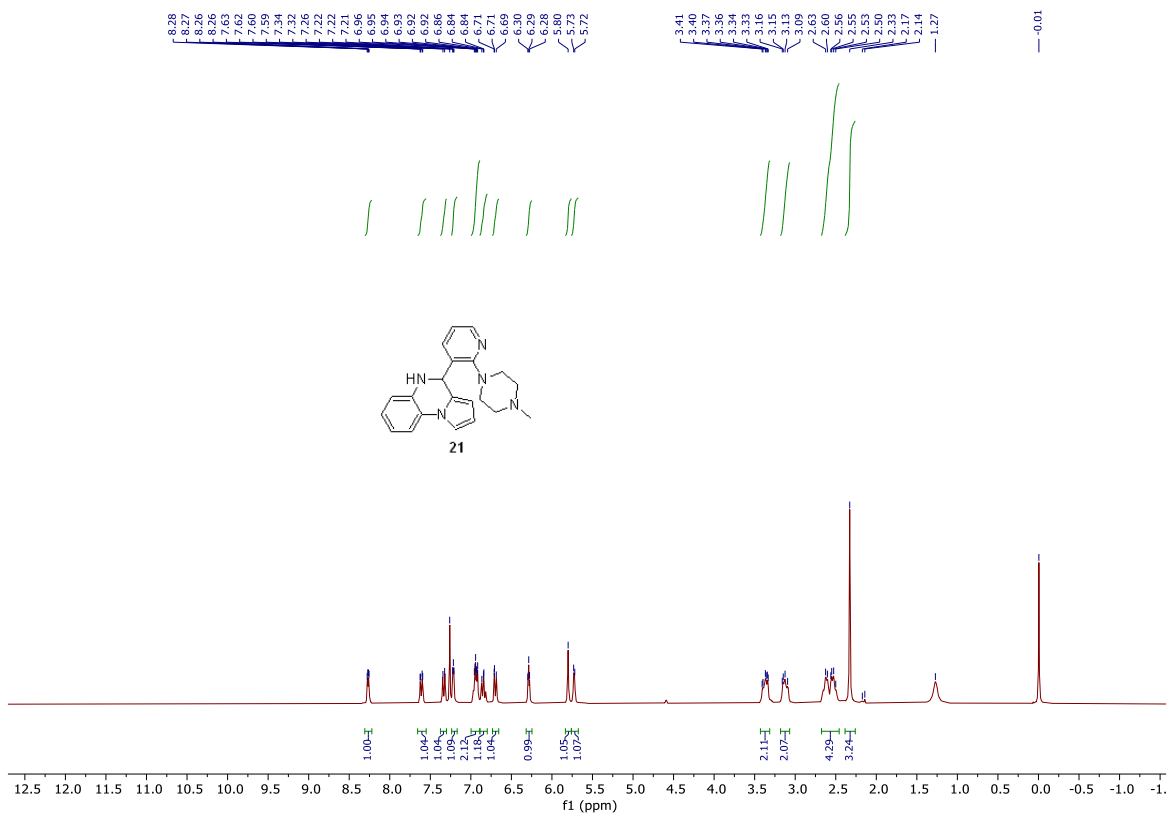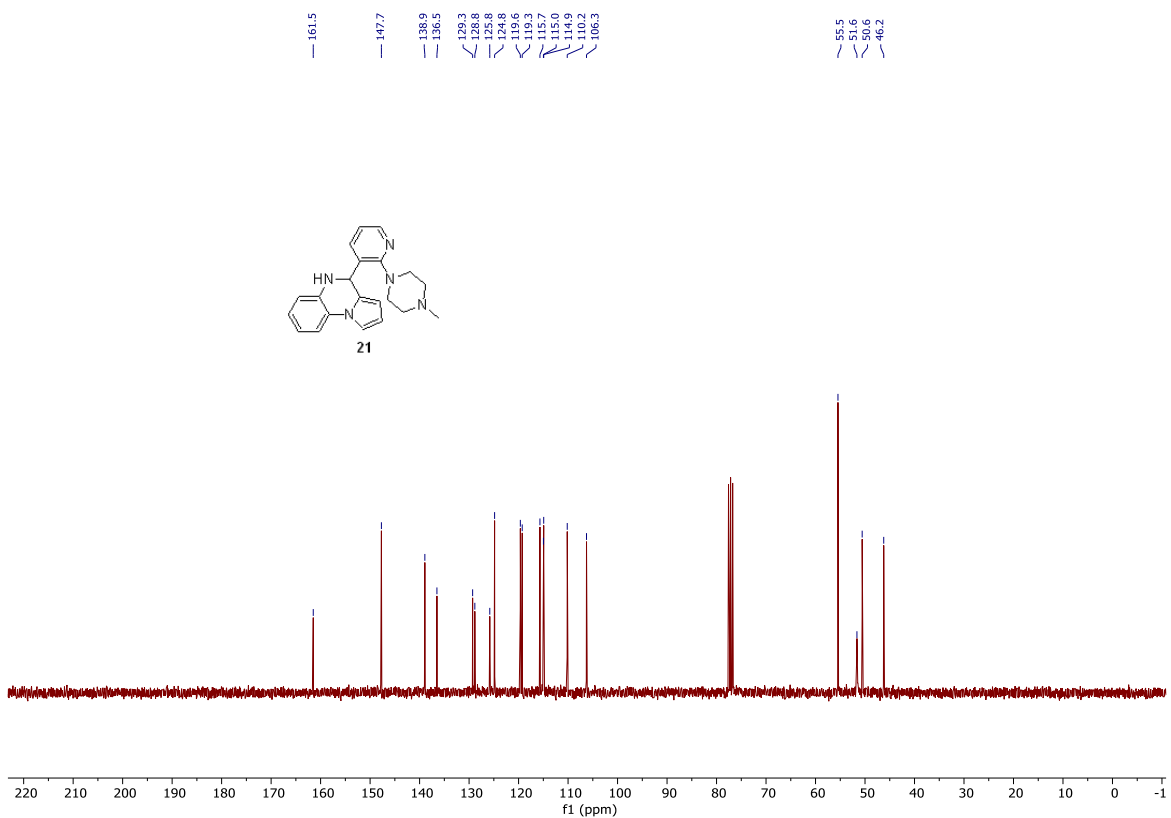



8.32  
8.32  
8.31  
8.30  
7.79  
7.77  
7.76  
7.38  
7.36  
7.35  
7.24  
7.24  
7.23  
7.23  
7.05  
7.03  
7.02  
7.01  
6.98  
6.96  
6.95  
6.94  
6.90  
6.88  
6.88  
6.86  
6.75  
6.74  
6.72  
6.72  
6.30  
6.29  
6.28  
5.85  
5.67  
5.67  
5.66  
5.65  
5.65  
3.78  
3.77  
3.76  
3.75  
3.70  
3.69  
3.67  
3.66  
3.65  
3.64  
3.63  
3.62  
3.61  
3.60  
3.58  
3.56  
3.55  
3.54  
3.53  
3.32  
3.31  
3.30  
3.29  
3.26  
3.25  
3.23  
3.22  
3.12  
3.10  
3.09  
3.08  
3.07  
3.05  
2.11

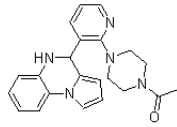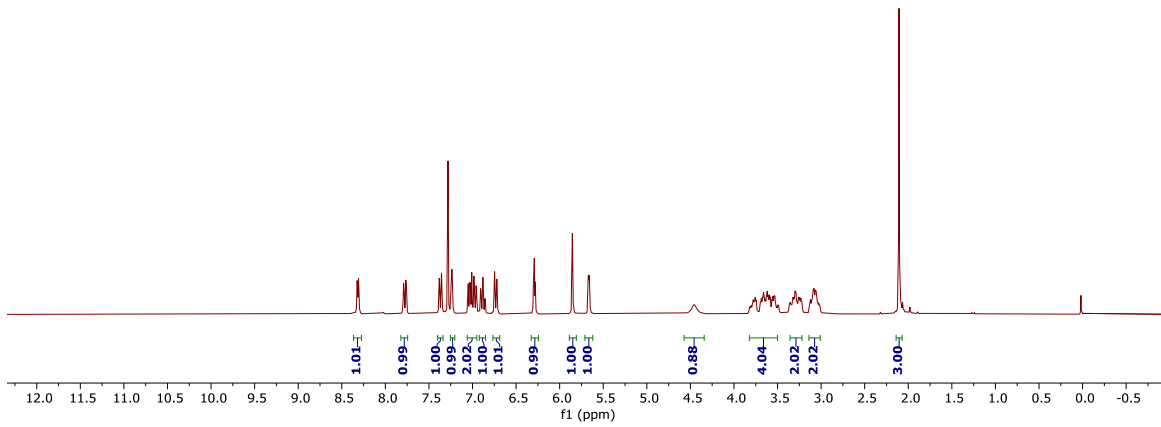

169.07  
161.03  
147.81  
139.19  
136.33  
129.49  
128.78  
125.69  
124.84  
119.93  
119.74  
115.57  
115.00  
114.91  
114.66  
106.06  
51.67  
50.35  
50.32  
46.42  
41.53  
21.40

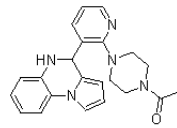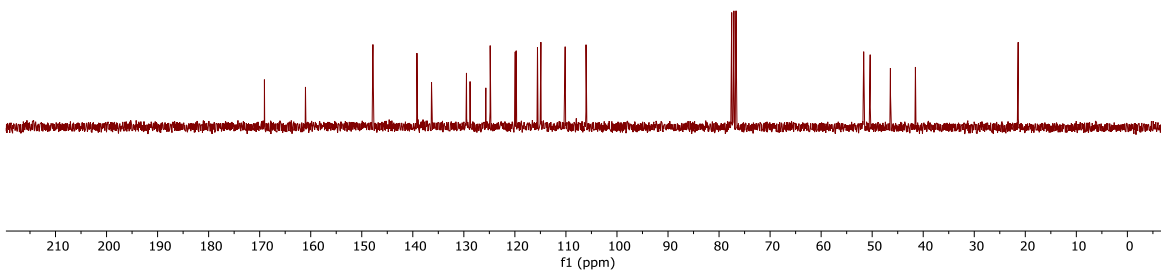

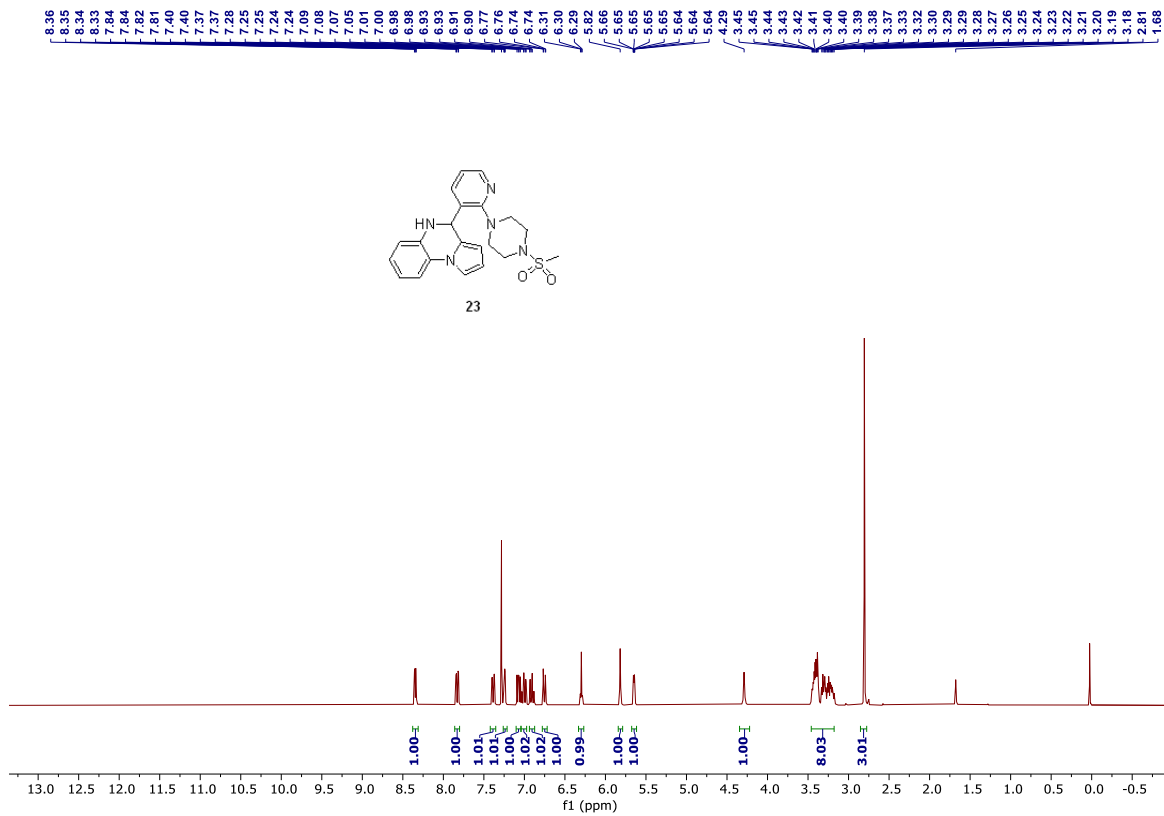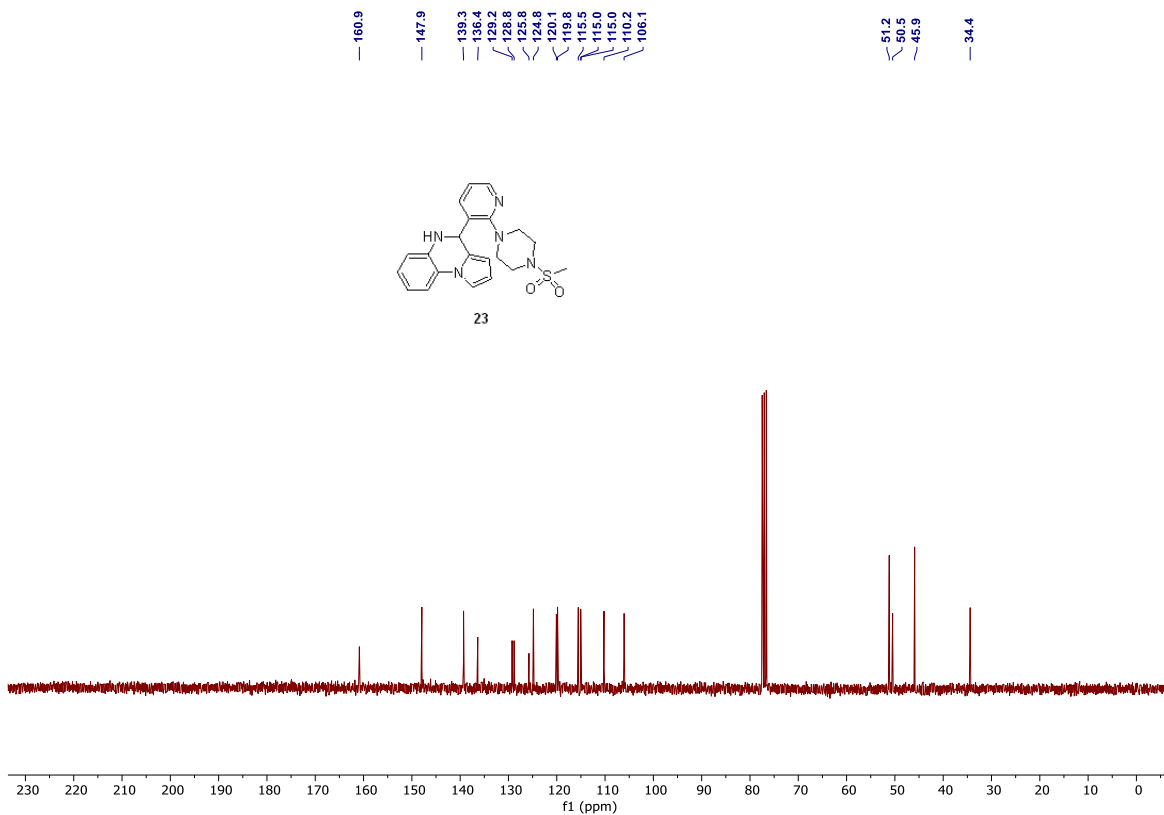

8.35  
8.34  
8.33  
8.33  
7.77  
7.75  
7.74  
7.58  
7.38  
7.37  
7.36  
7.25  
7.25  
7.24  
7.24  
7.04  
7.03  
7.02  
7.02  
7.00  
7.00  
6.99  
6.97  
6.97  
6.92  
6.91  
6.89  
6.89  
6.75  
6.75  
6.73  
6.72  
6.31  
6.30  
6.29  
5.85  
5.71  
5.70  
5.69  
5.69  
5.69  
5.69  
3.91  
3.90  
3.89  
3.88  
3.87  
3.86  
3.83  
3.82  
3.81  
3.80  
3.79  
3.77  
3.56  
3.38  
3.35  
3.35  
3.34  
3.34  
3.34  
3.33  
3.33  
3.32  
3.32  
3.32  
3.13  
3.12  
3.11  
3.10  
3.10  
3.09  
3.09  
3.08  
3.08  
3.07  
3.06

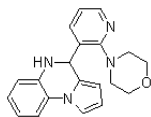

24

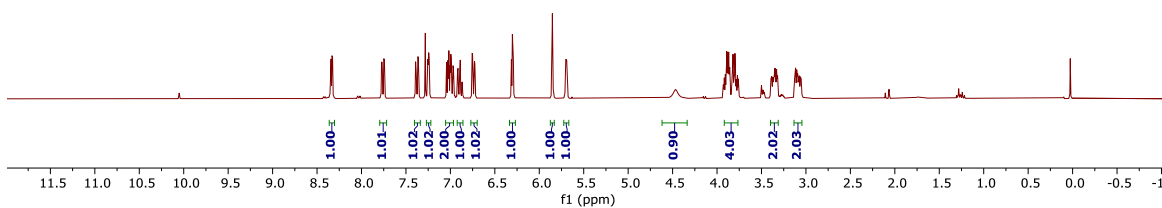

161.3  
147.8  
139.1  
136.4  
129.3  
128.9  
123.8  
123.6  
119.7  
119.6  
115.6  
115.0  
114.9  
110.1  
106.2  
67.1  
52.1  
50.4

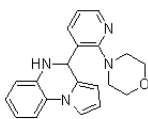

24

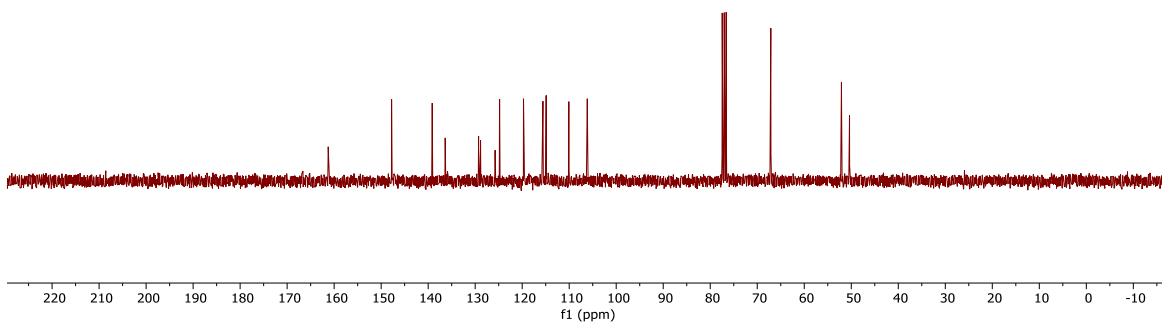

8.33  
8.32  
8.31  
8.31  
7.79  
7.78  
7.76  
7.75  
7.60  
7.40  
7.37  
7.37  
7.26  
7.26  
7.25  
7.25  
7.05  
7.04  
7.03  
7.02  
7.01  
7.00  
7.00  
6.97  
6.97  
6.93  
6.92  
6.90  
6.90  
6.88  
6.87  
6.76  
6.76  
6.75  
6.73  
6.73  
6.32  
6.31  
6.30  
5.92  
5.92  
5.70  
5.69  
5.69  
5.68  
5.68  
4.35  
3.49  
3.47  
3.46  
3.45  
3.45  
3.43  
3.42  
3.40  
3.31  
3.28  
3.28  
3.26  
3.25  
3.24  
3.24  
2.24  
2.24  
2.21  
2.21  
2.20  
2.19  
2.19  
2.18  
2.17  
2.17  
2.11  
2.11  
2.09  
2.09  
2.08  
2.08  
2.07  
2.07  
2.06

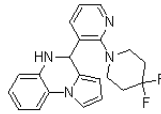

25

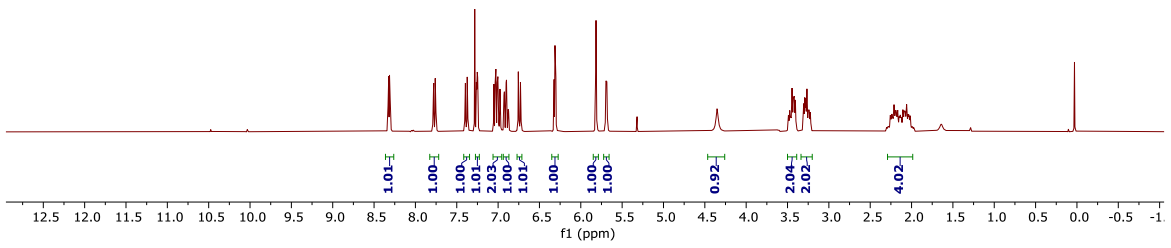

160.9  
147.8  
147.6  
139.2  
139.0  
136.3  
128.1  
128.1  
125.8  
125.8  
125.0  
124.8  
121.8  
119.8  
119.7  
118.6  
118.6  
115.1  
115.0  
114.9  
114.9  
110.2  
110.0  
106.1  
105.9  
50.7  
50.5  
48.8  
34.5  
34.2  
33.9

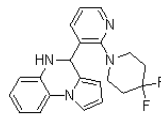

25

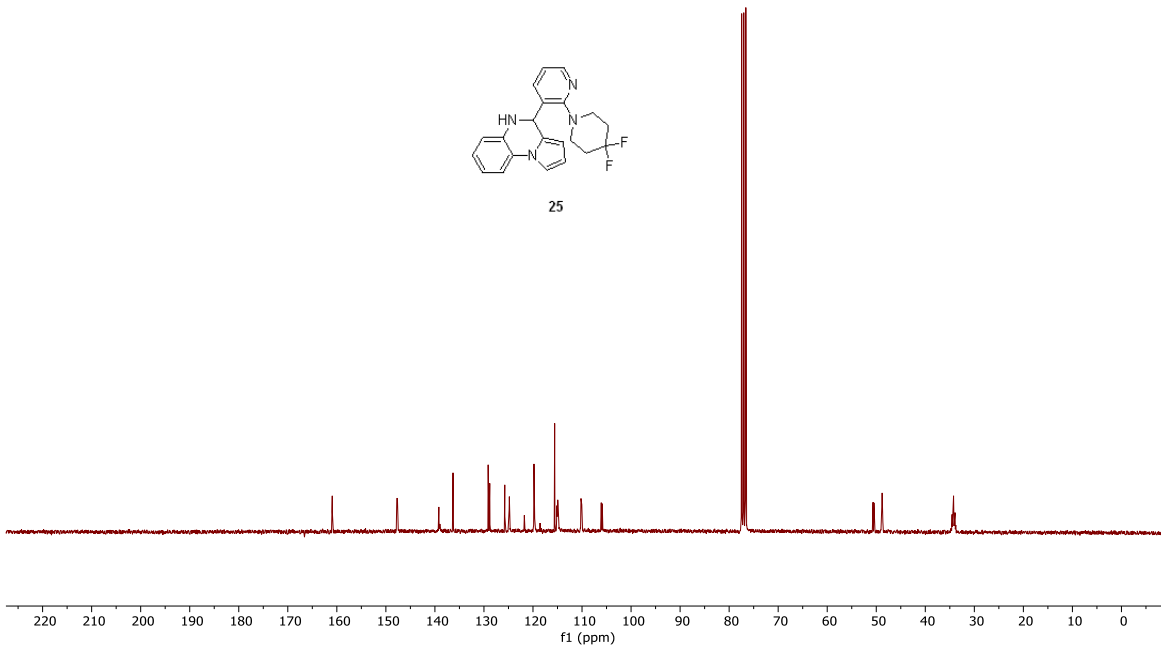

8.33  
8.32  
8.31  
7.92  
7.91  
7.89  
7.88  
7.87  
7.40  
7.38  
7.37  
7.26  
7.25  
7.25  
7.24  
7.13  
7.12  
7.11  
7.09  
7.02  
7.01  
6.99  
6.98  
6.95  
6.94  
6.92  
6.90  
6.77  
6.77  
6.75  
6.74  
6.30  
6.29  
6.28  
5.76  
5.69  
5.68  
5.67  
5.57  
4.15  
3.88  
3.85  
3.84  
3.84  
3.83  
3.82  
3.81  
3.81  
3.77  
3.76  
3.75  
3.74  
3.72  
3.70  
3.36  
3.35  
3.34  
3.33  
3.32  
3.31  
3.30  
3.29  
3.28  
3.10  
3.09  
3.08  
3.07  
3.06  
3.04  
3.04  
3.03  
3.02

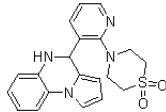

26

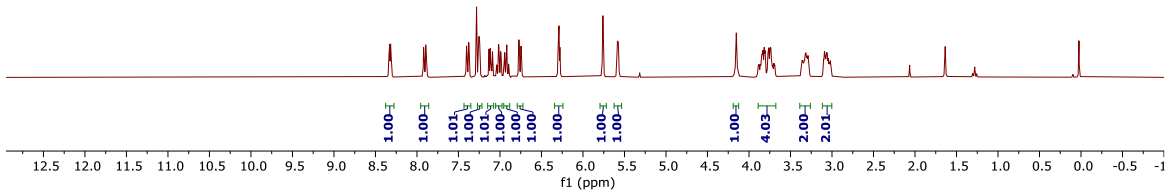

159.7  
147.8  
139.8  
136.2  
128.7  
125.7  
125.0  
120.4  
120.1  
115.6  
115.3  
115.0  
110.2  
105.7  
51.1  
50.9  
50.0

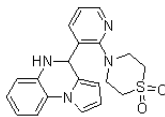

26

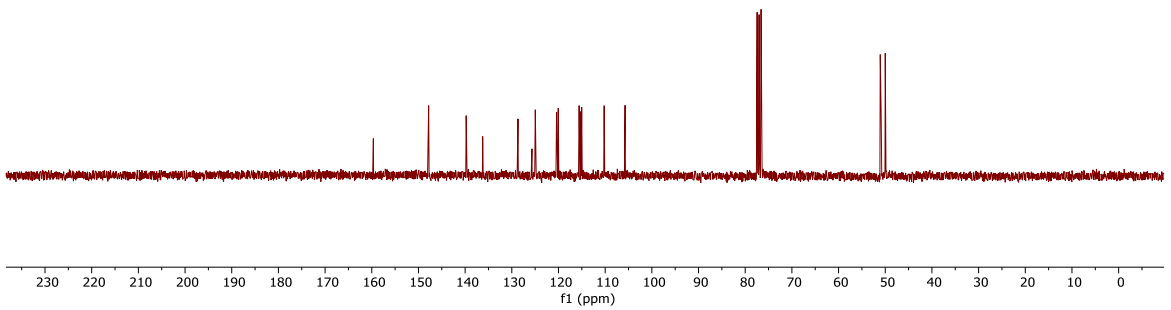

8.30  
8.29  
8.28  
8.27  
7.80  
7.80  
7.58  
7.57  
7.37  
7.35  
7.35  
7.26  
7.25  
7.25  
7.24  
7.00  
6.99  
6.98  
6.97  
6.96  
6.95  
6.95  
6.94  
6.94  
6.89  
6.87  
6.86  
6.84  
6.84  
6.73  
6.72  
6.70  
6.70  
6.34  
6.32  
6.31  
6.28  
5.98  
5.77  
5.77  
5.77  
3.88  
3.87  
3.85  
3.51  
3.47  
3.47  
3.33  
3.32  
3.23  
3.22  
3.18  
3.18  
2.91  
2.90  
2.89  
2.10  
2.09  
2.08  
2.07  
1.88  
1.87  
1.86  
1.81  
1.80  
1.79  
1.78  
1.76  
1.75  
1.74  
1.71  
1.67

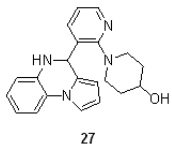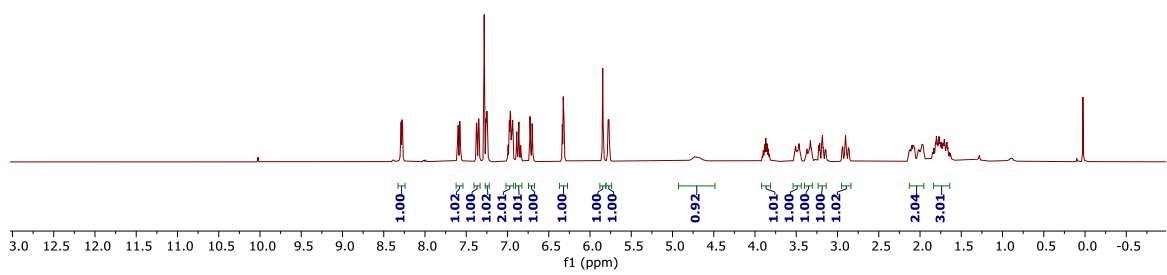

161.75  
147.54  
138.68  
136.20  
129.84  
128.44  
125.68  
124.78  
119.57  
119.44  
115.64  
114.86  
114.82  
110.08  
106.11  
67.92  
50.57  
48.79  
34.96  
34.89

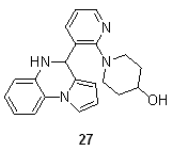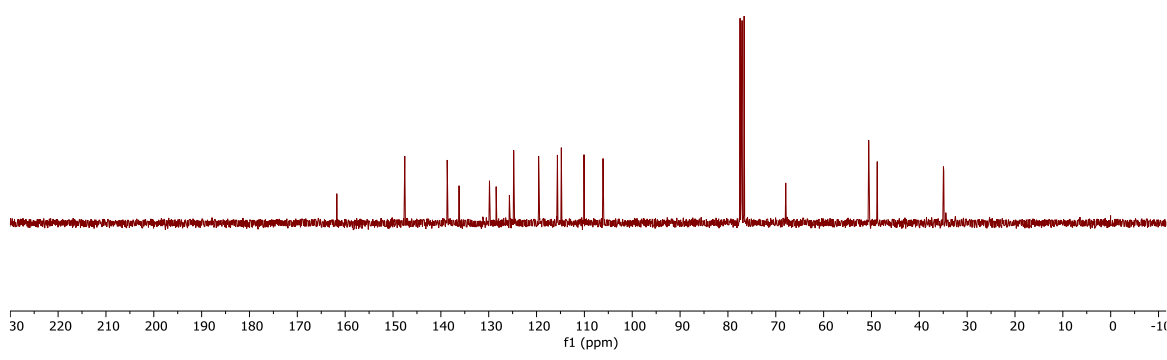

8.34  
8.33  
8.32  
8.32  
8.23  
8.22  
8.22  
8.22  
8.21  
8.20  
8.20  
7.74  
7.74  
7.72  
7.71  
7.71  
7.50  
7.39  
7.38  
7.36  
7.26  
7.26  
7.25  
7.25  
7.03  
7.01  
7.00  
7.00  
6.98  
6.98  
6.87  
6.87  
6.85  
6.85  
6.80  
6.80  
6.88  
6.87  
6.74  
6.74  
6.72  
6.71  
6.71  
6.70  
6.70  
6.68  
6.68  
6.66  
6.66  
6.65  
6.64  
6.64  
6.34  
6.33  
6.31  
5.92  
5.92  
5.77  
5.76  
5.76  
5.75  
5.75  
4.60  
3.76  
3.75  
3.74  
3.73  
3.72  
3.72  
3.64  
3.63  
3.62  
3.62  
3.46  
3.45  
3.28  
3.27  
3.26  
3.25

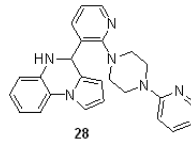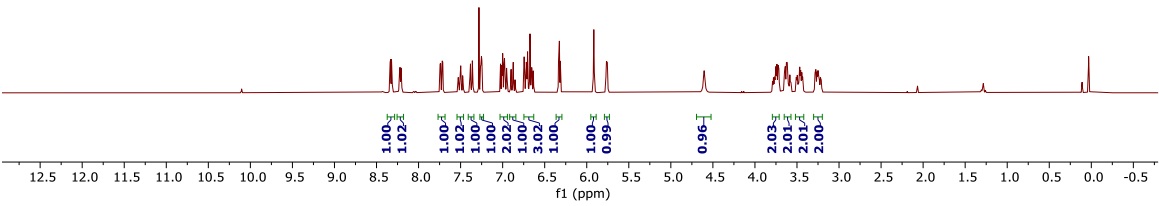

161.3  
159.6  
147.9  
147.7  
139.0  
137.5  
136.3  
129.4  
128.7  
125.7  
124.8  
119.7  
118.6  
115.6  
115.0  
114.9  
113.6  
110.1  
107.4  
106.2  
51.4  
45.2

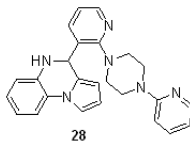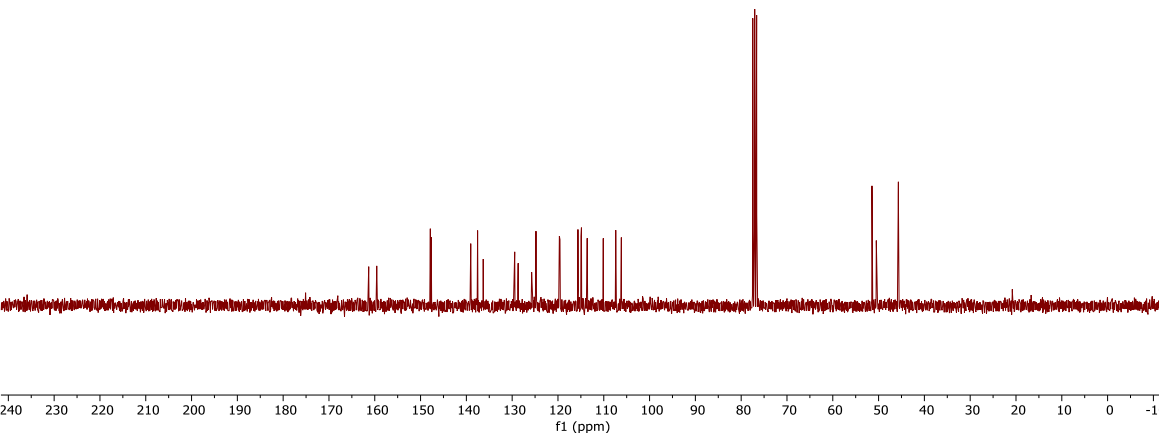

8.27  
8.27  
8.26  
8.25  
7.49  
7.47  
7.46  
7.35  
7.32  
7.25  
7.24  
7.24  
6.87  
6.87  
6.84  
6.84  
6.83  
6.82  
6.81  
6.80  
6.80  
6.86  
6.86  
6.84  
6.83  
6.69  
6.68  
6.66  
6.66  
6.34  
6.33  
6.32  
5.84  
5.83  
5.83  
5.82  
5.82  
4.88  
3.52  
3.49  
3.48  
3.40  
3.39  
3.20  
3.17  
3.16  
2.86  
2.83  
2.82  
2.79  
2.63  
2.63  
2.63  
2.61  
2.19  
2.18  
2.16  
2.15  
2.11  
1.89  
1.89  
1.85  
1.84  
1.83  
1.81  
1.79  
1.78  
1.77  
1.72  
1.71

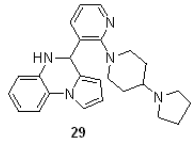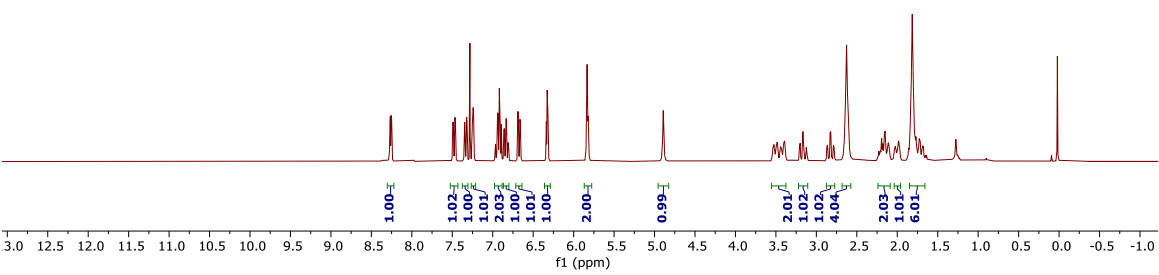

161.8  
147.5  
138.3  
136.2  
129.9  
128.2  
125.6  
124.8  
119.4  
119.2  
115.6  
114.8  
114.7  
110.0  
106.0  
61.6  
52.7  
50.7  
49.1  
32.3  
23.3

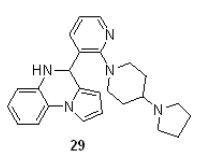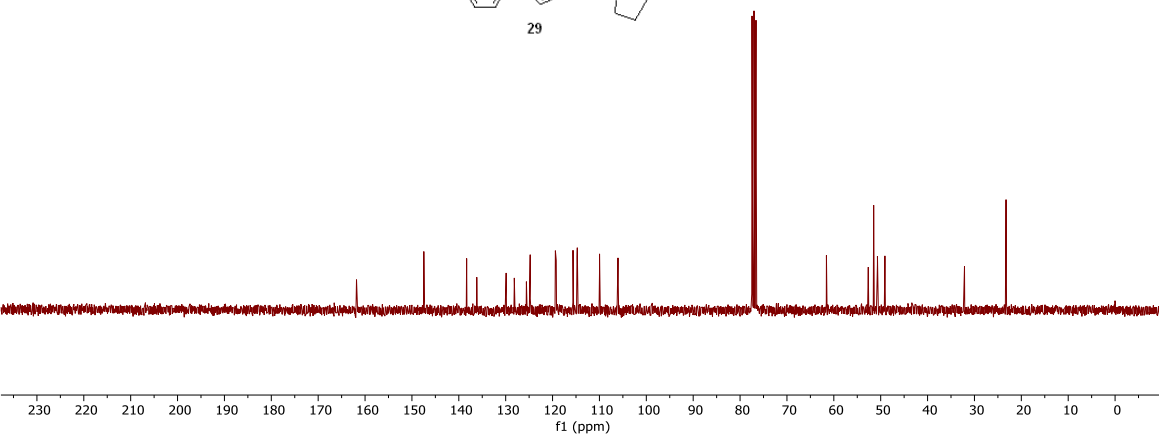



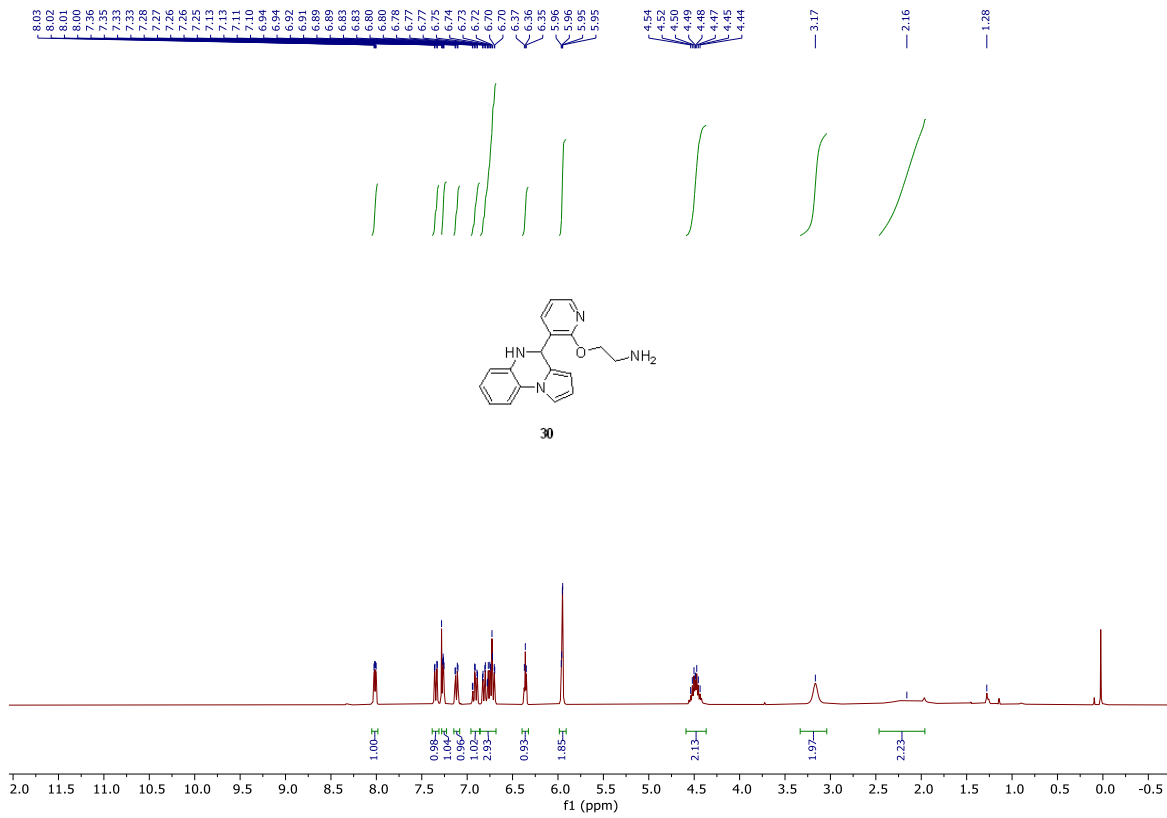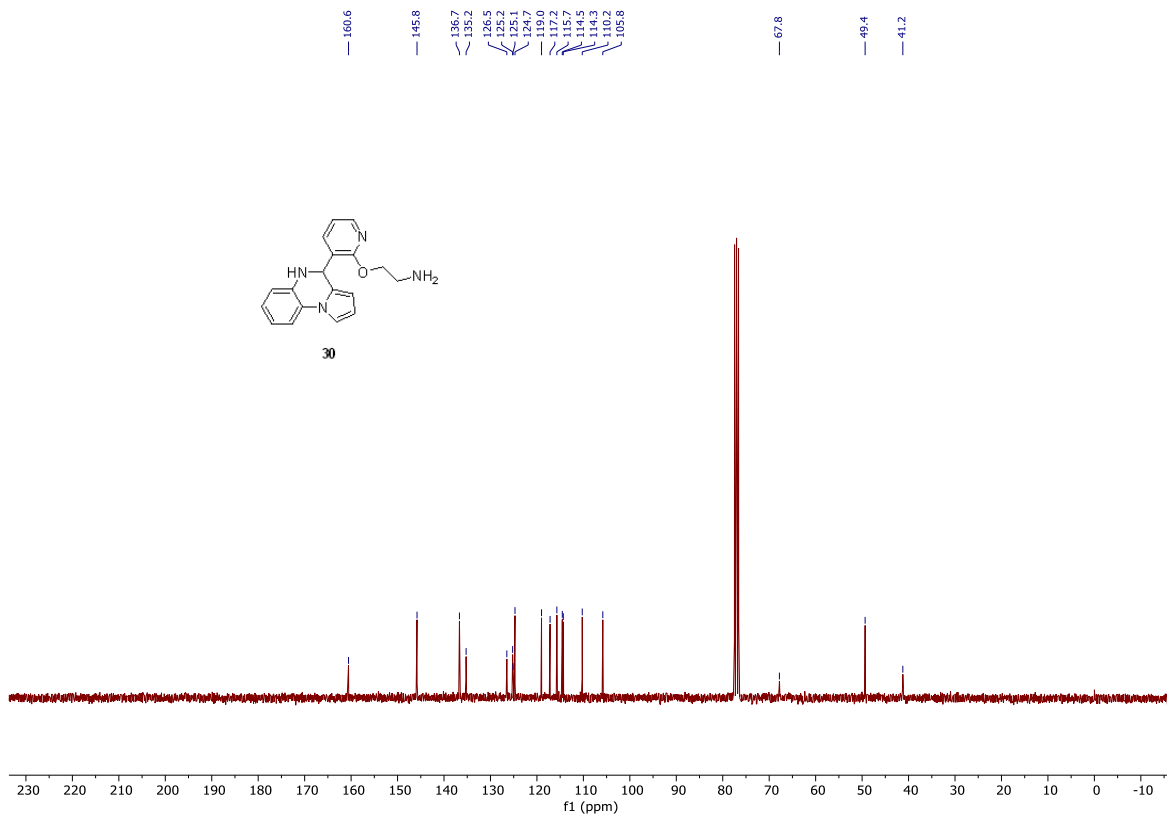

8.32  
8.31  
8.30  
7.88  
7.86  
7.85  
7.83  
7.38  
7.36  
7.35  
7.25  
7.24  
7.24  
7.01  
7.00  
6.99  
6.99  
6.97  
6.95  
6.90  
6.90  
6.88  
6.87  
6.74  
6.71  
6.71  
6.32  
6.31  
6.30  
5.84  
5.75  
5.74  
5.74  
5.73  
5.73  
4.58  
3.67  
3.67  
3.65  
3.64  
3.63  
3.42  
3.41  
3.40  
3.39  
3.38  
3.37  
3.36  
3.17  
3.16  
3.15  
3.14  
3.13  
3.12  
3.11  
3.10  
2.75  
2.74  
2.72  
2.71  
2.69  
2.67  
2.66  
2.64  
2.62  
2.62  
2.60  
2.58

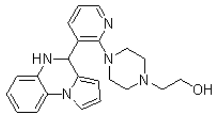

35

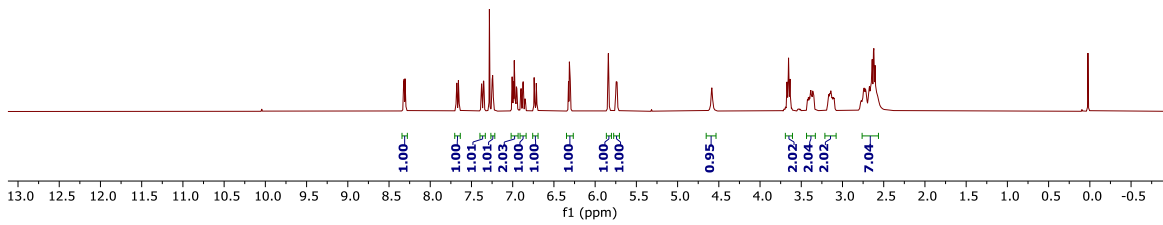

161.3  
147.7  
138.9  
136.3  
129.4  
128.7  
127.7  
123.8  
119.6  
119.4  
115.6  
114.9  
114.9  
110.1  
106.2  
59.3  
57.7  
53.1  
51.6  
50.5

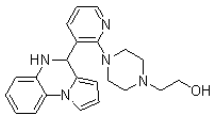

35

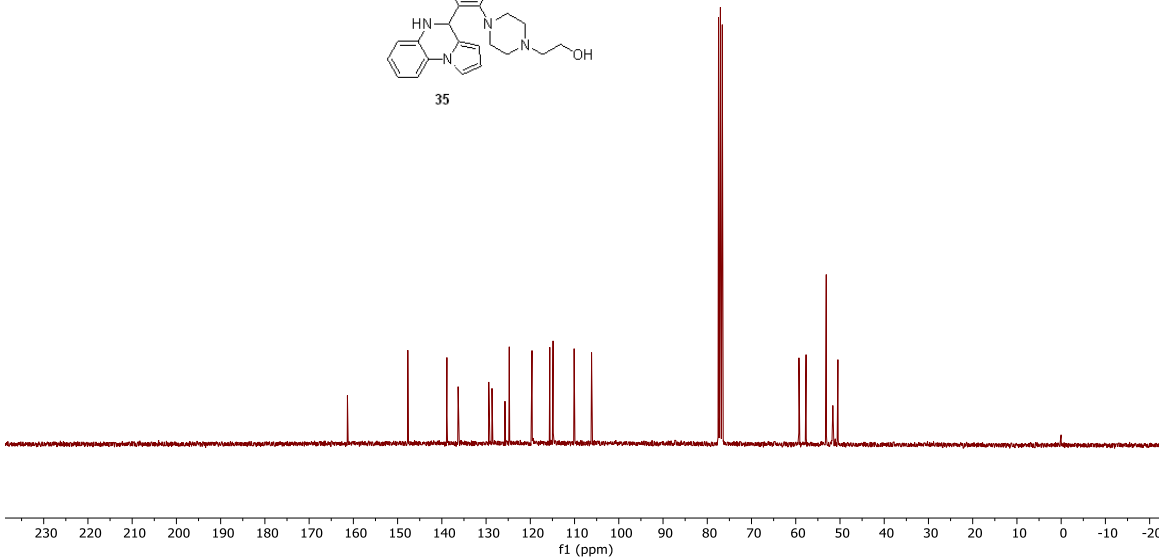

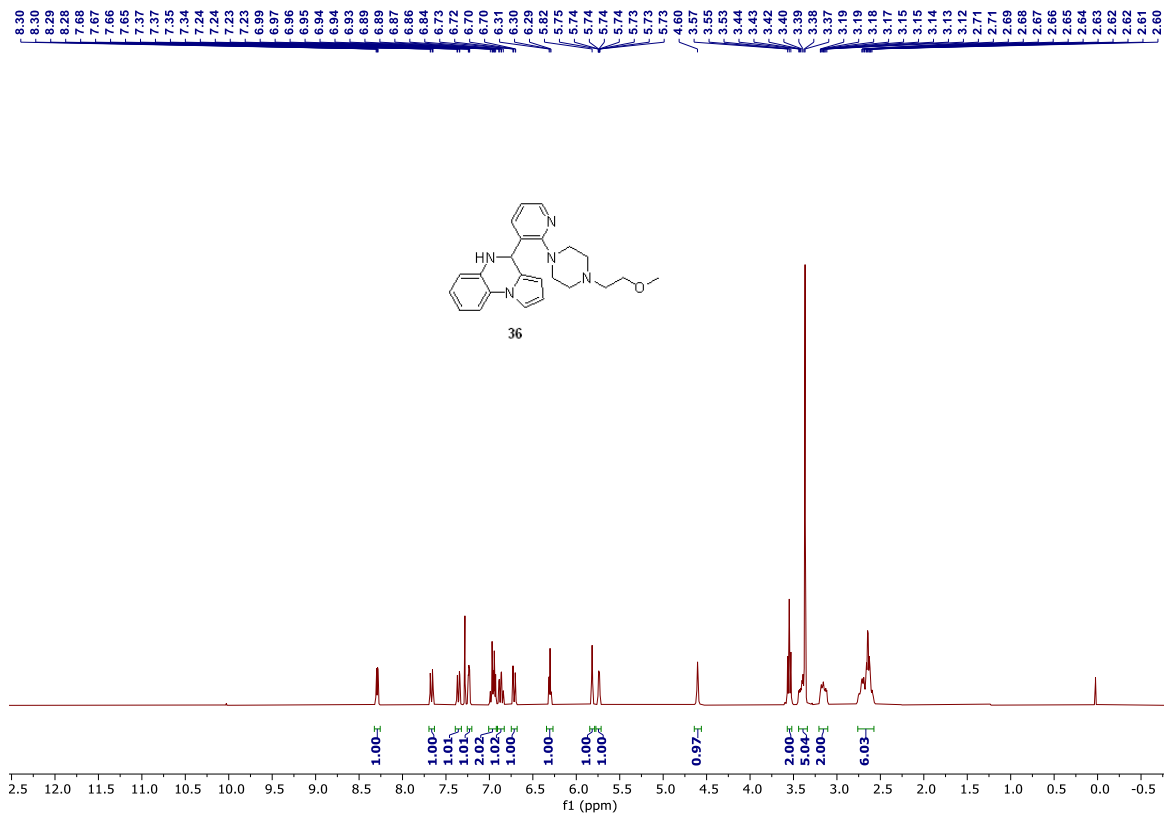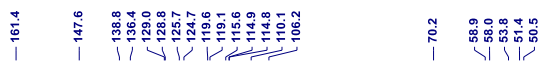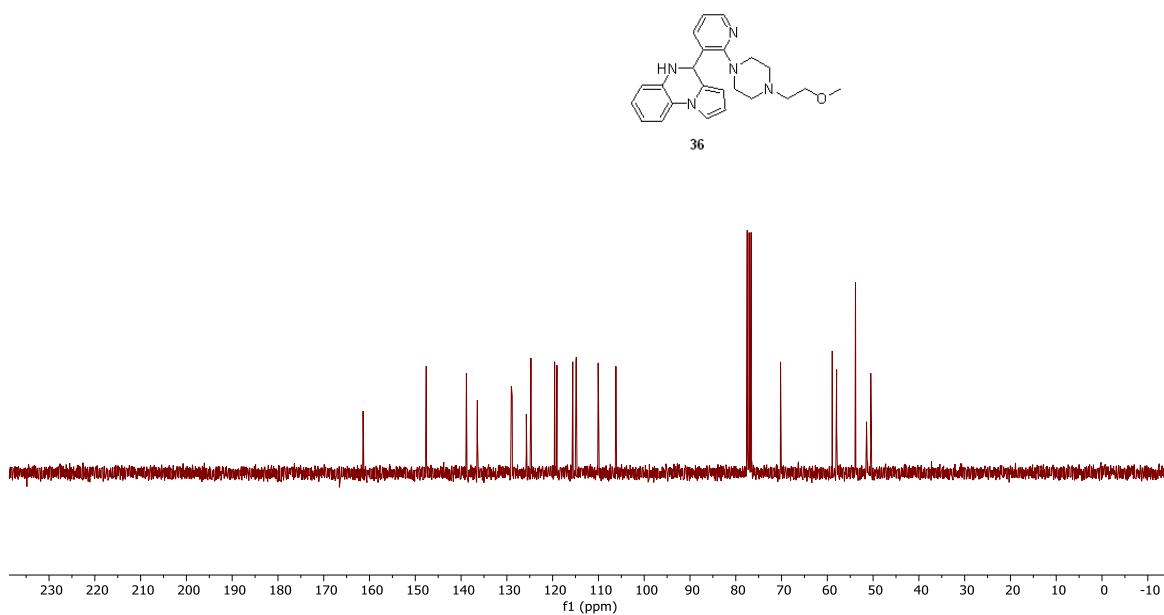

8.32  
8.31  
8.30  
8.29  
7.70  
7.69  
7.67  
7.66  
7.37  
7.35  
7.35  
7.25  
7.24  
7.24  
7.23  
7.00  
7.00  
6.99  
6.97  
6.96  
6.95  
6.90  
6.90  
6.88  
6.87  
6.85  
6.85  
6.74  
6.73  
6.72  
6.71  
6.71  
6.31  
6.30  
6.29  
5.91  
5.90  
5.72  
5.72  
5.71  
5.71  
3.46  
3.44  
3.42  
3.41  
3.40  
3.39  
3.35  
3.34  
3.22  
3.21  
3.19  
3.19  
3.16  
3.15  
3.14  
2.77  
2.69  
2.66  
2.60  
2.57  
2.56  
2.54  
1.89  
1.86  
1.85  
1.84  
1.83  
1.82  
1.81  
1.79

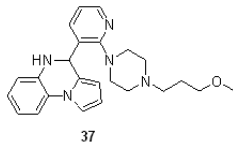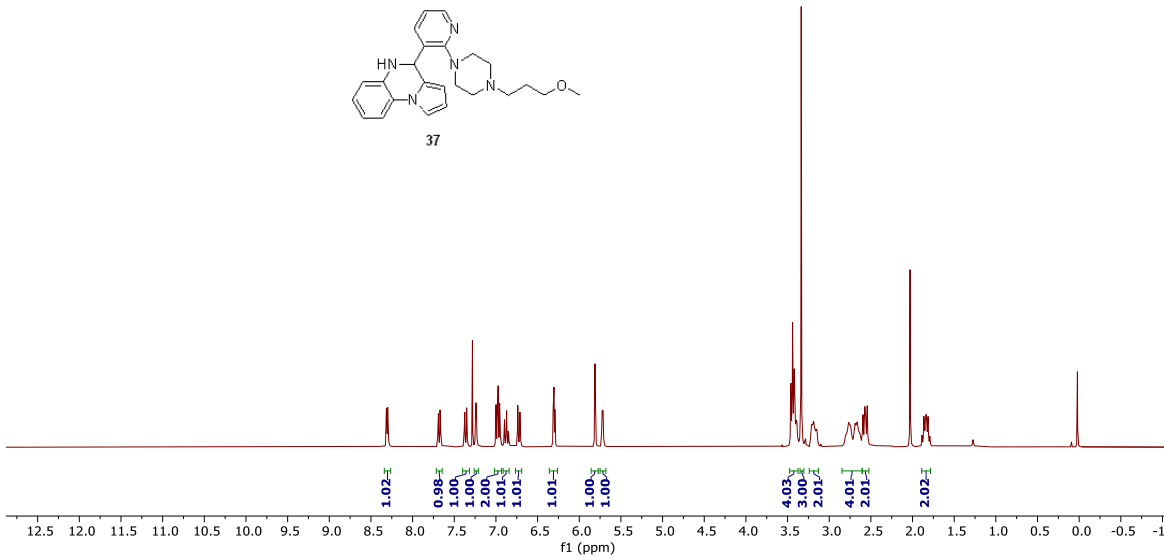

161.2  
147.6  
138.9  
136.3  
129.1  
128.7  
125.7  
124.8  
119.6  
119.3  
115.6  
114.9  
110.1  
106.2  
70.9  
58.6  
55.2  
51.0  
50.5  
26.3

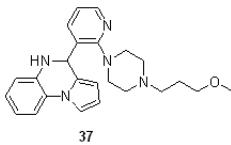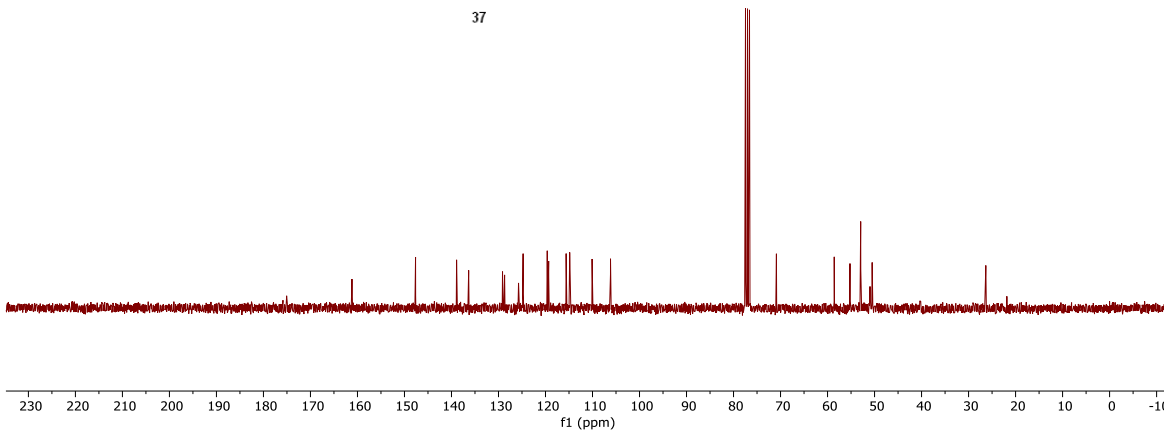

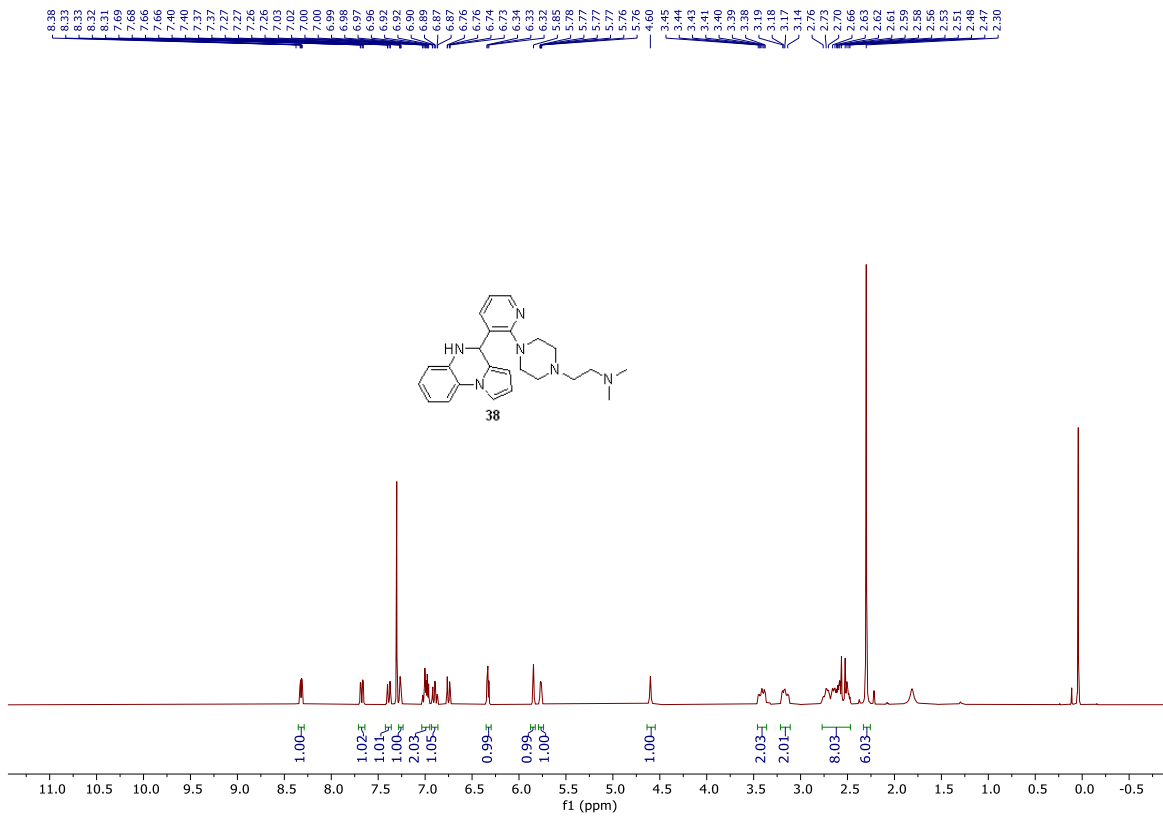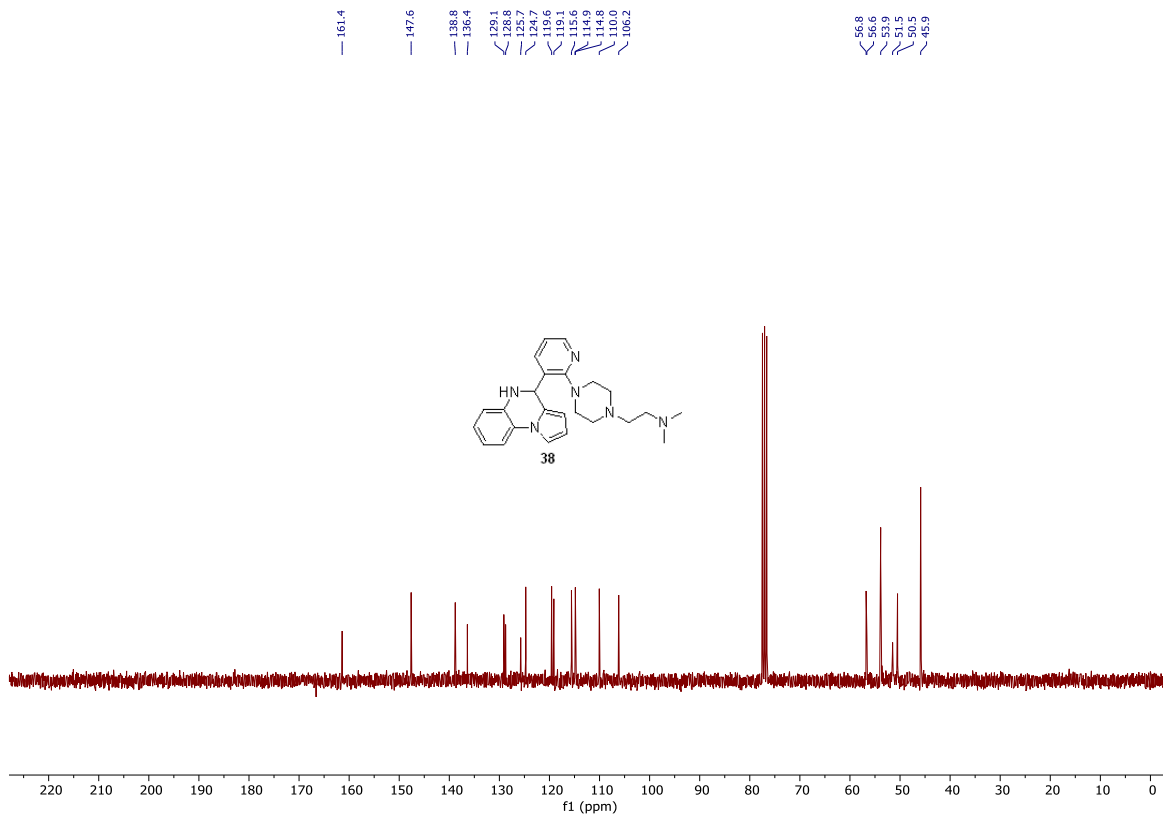

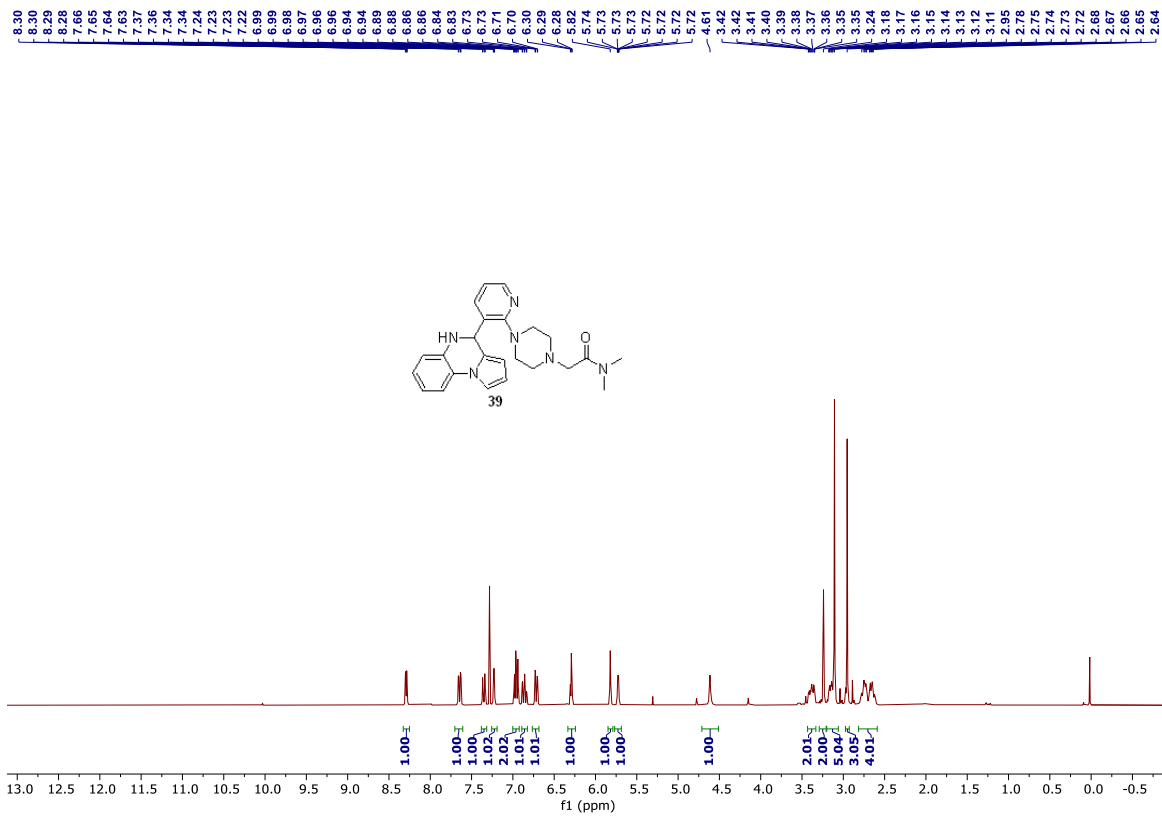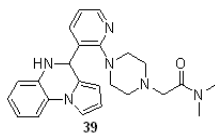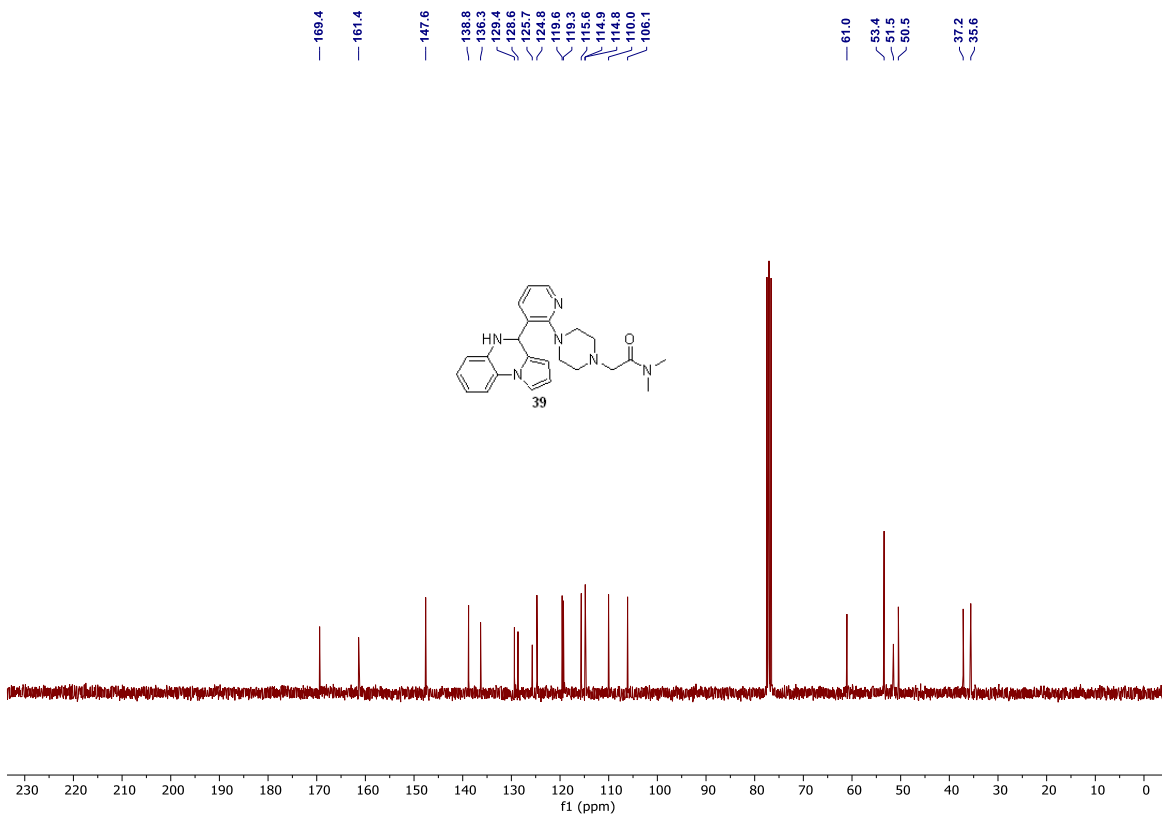

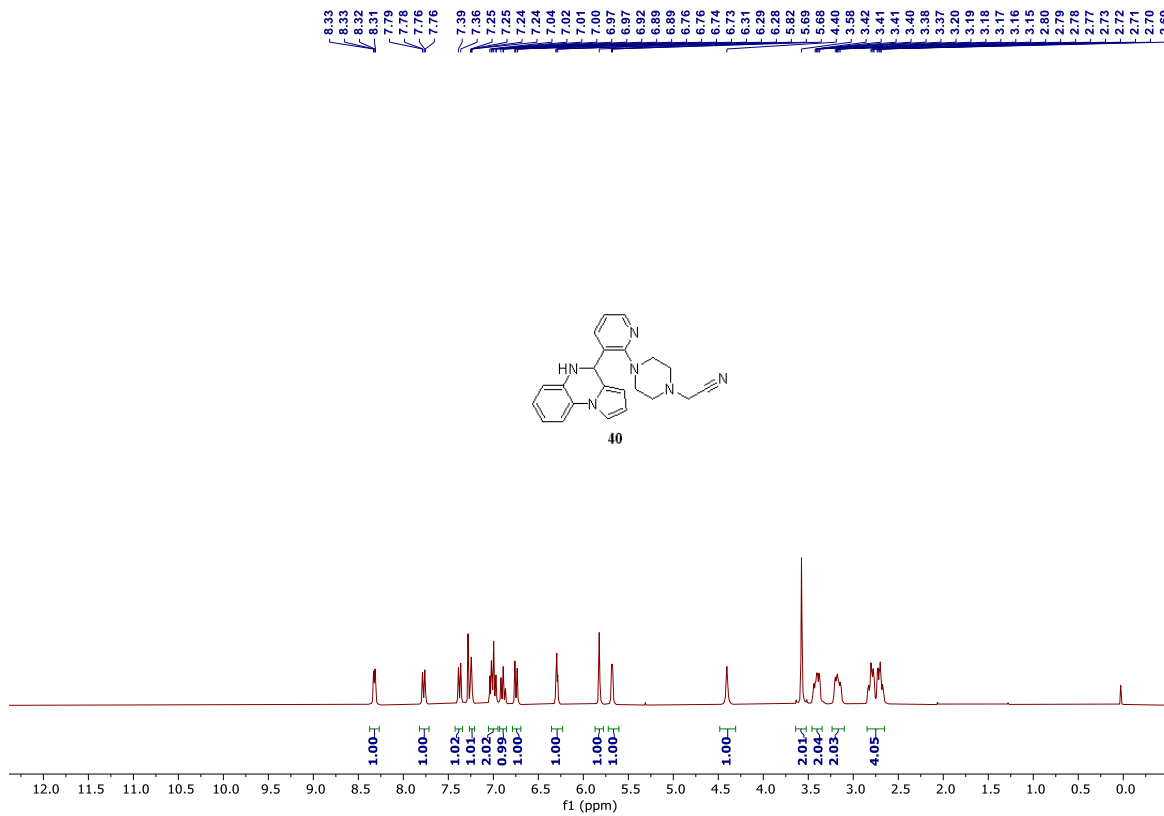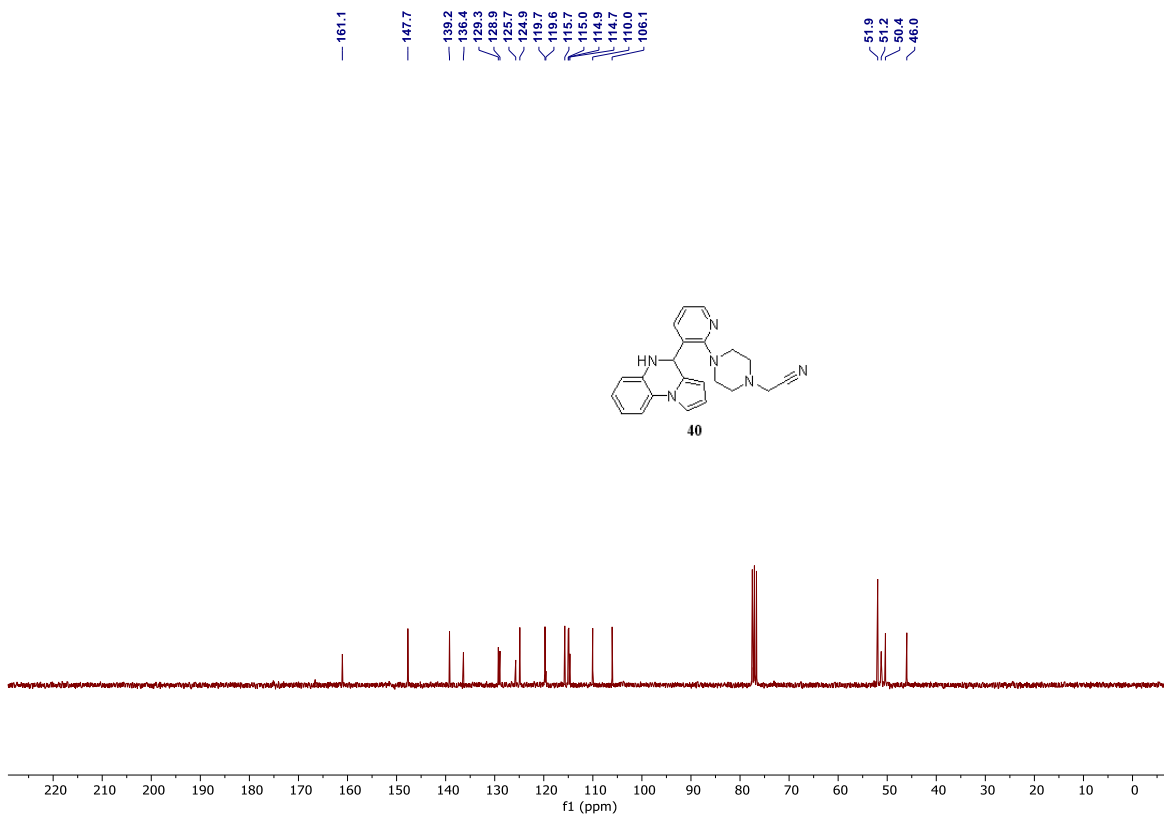

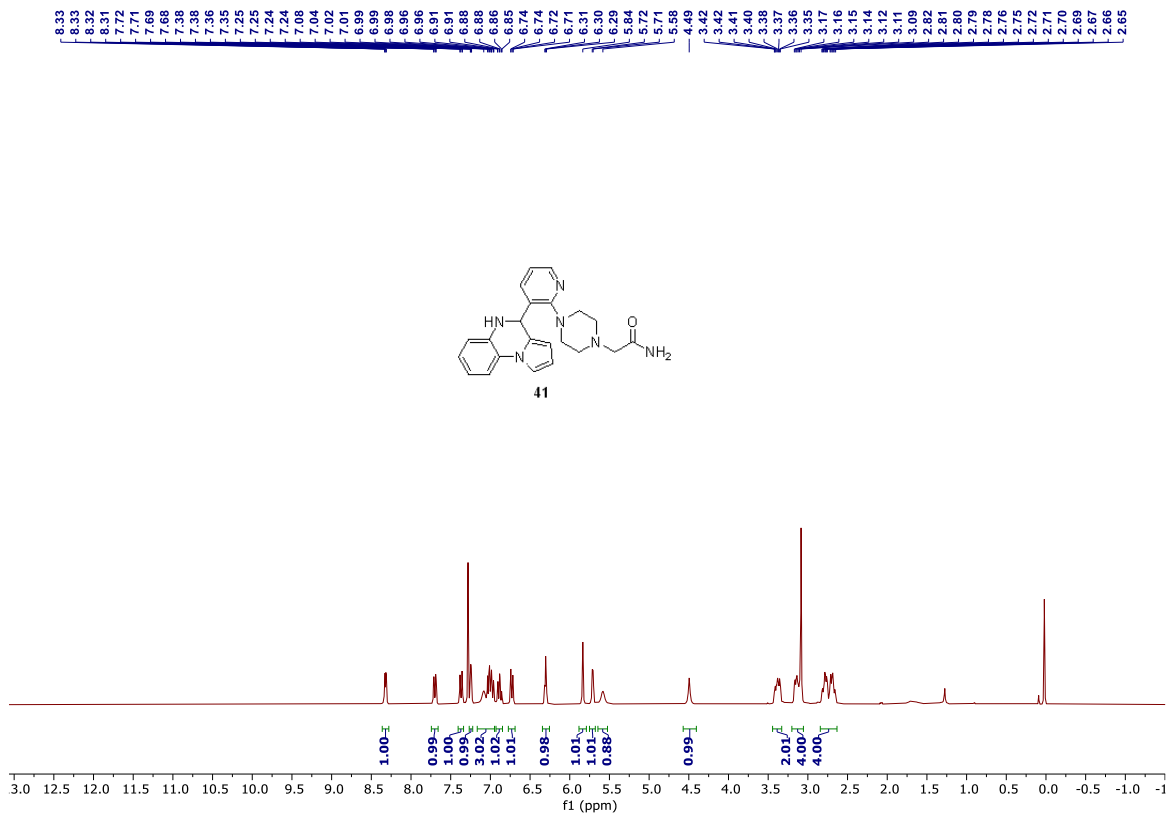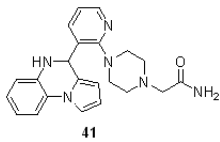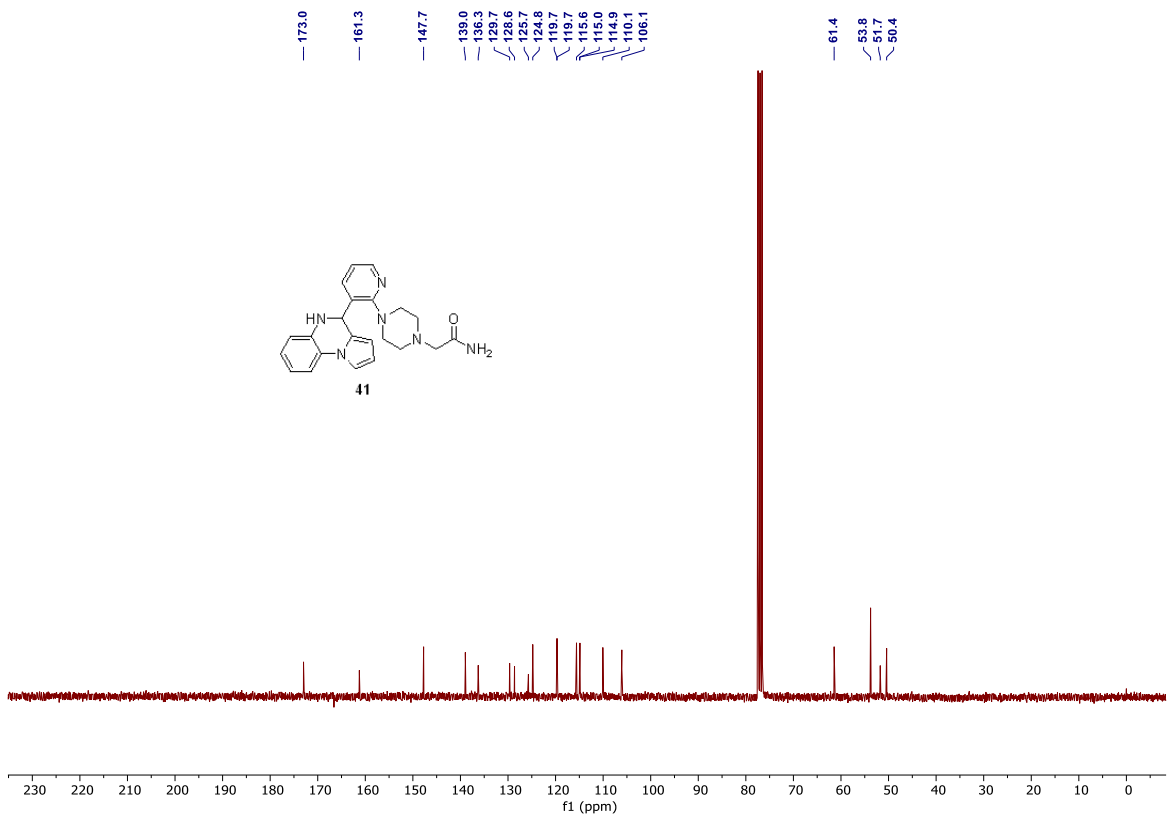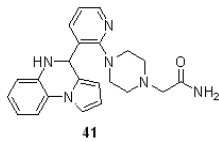



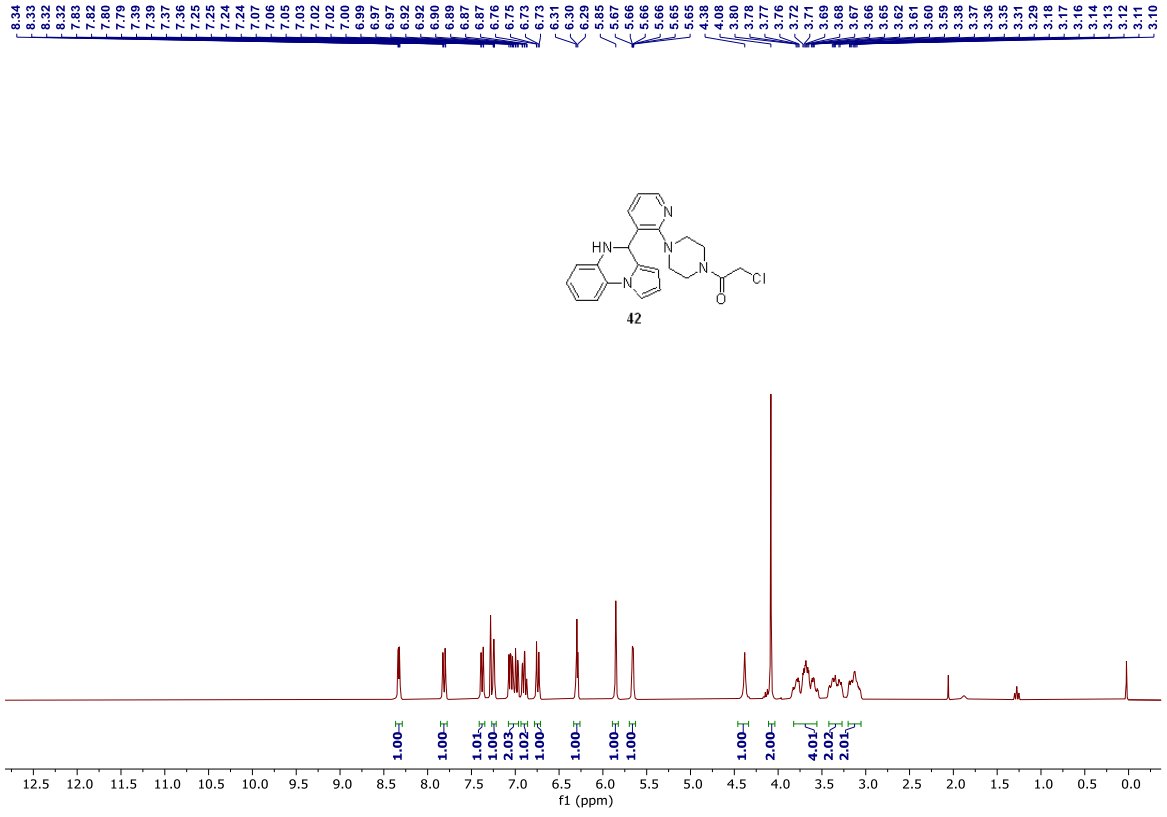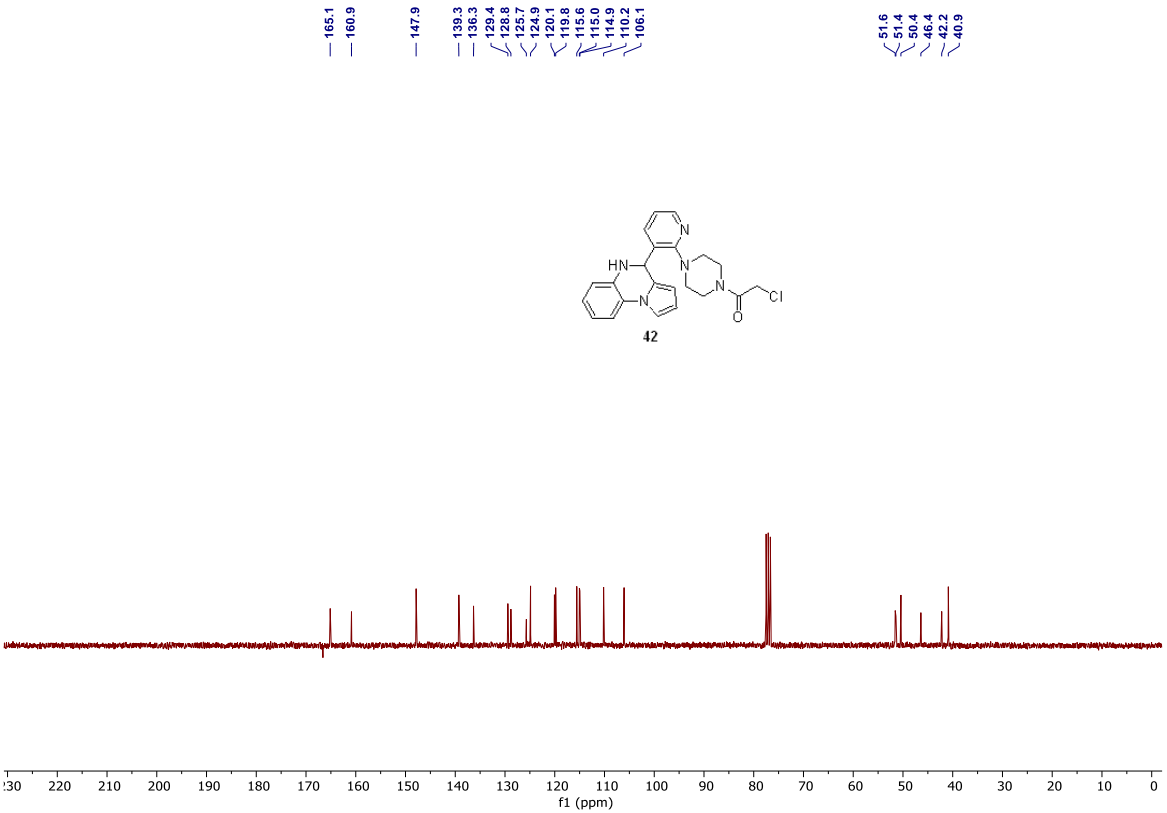

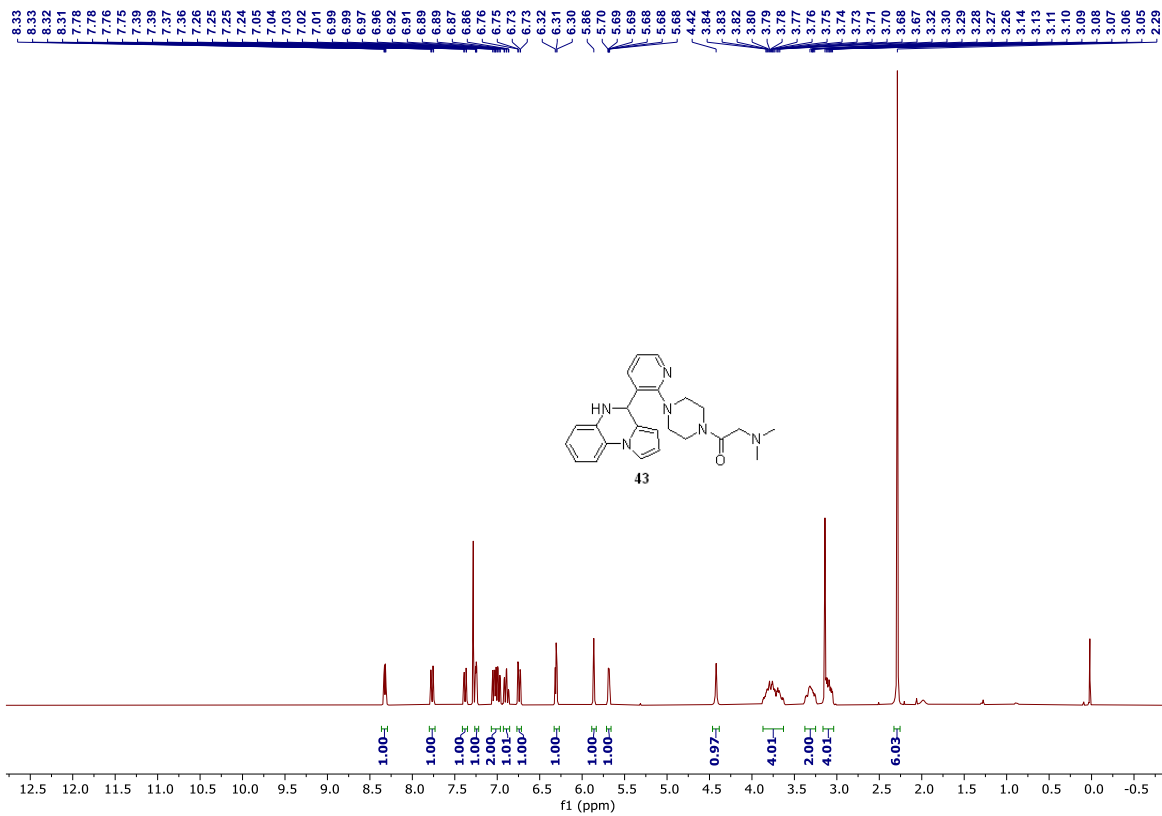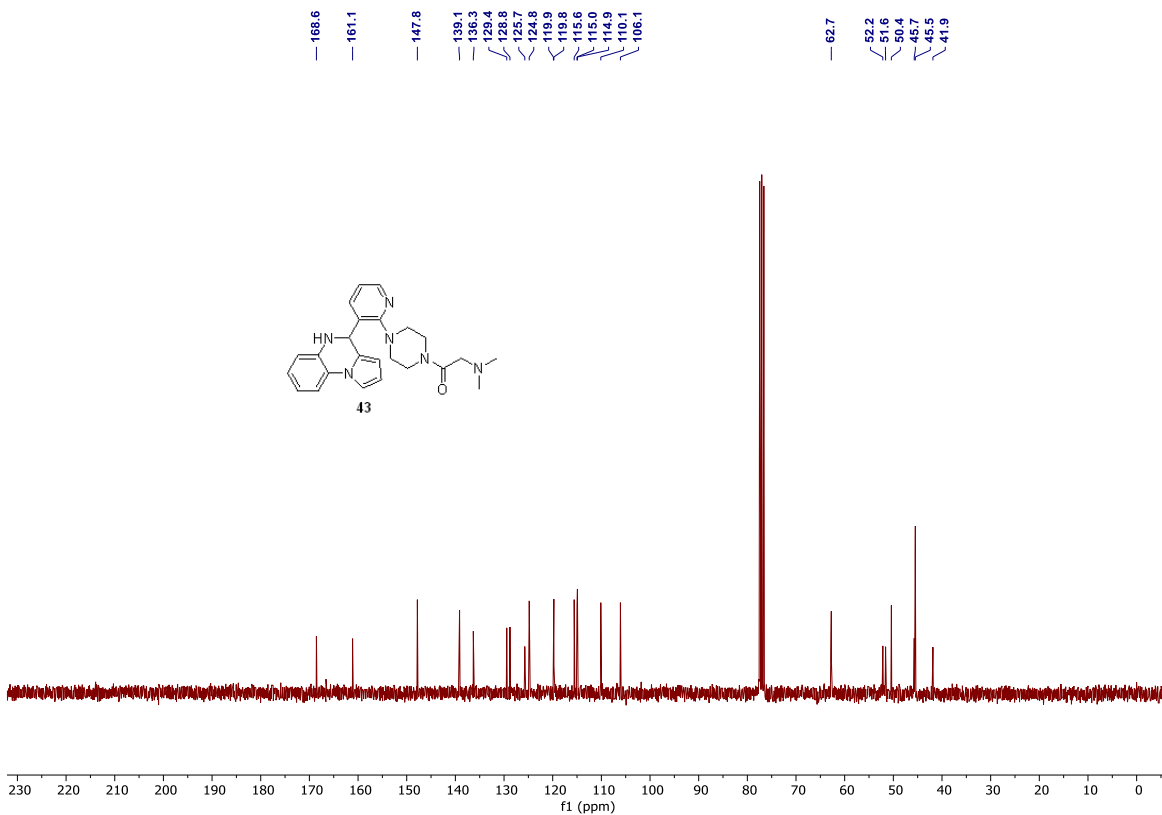

8.30  
8.29  
8.28  
8.28  
8.28  
7.76  
7.75  
7.73  
7.72  
7.69  
7.37  
7.35  
7.35  
7.25  
7.24  
7.24  
7.24  
7.23  
7.03  
7.02  
7.01  
7.00  
6.99  
6.98  
6.98  
6.98  
6.98  
6.91  
6.90  
6.88  
6.87  
6.74  
6.74  
6.72  
6.71  
6.31  
6.29  
6.29  
5.84  
5.68  
5.67  
4.98  
4.98  
4.23  
4.23  
4.20  
4.20  
4.18  
3.90  
3.89  
3.89  
3.88  
3.87  
3.86  
3.86  
3.85  
3.84  
3.83  
3.82  
3.81  
3.50  
3.49  
3.47  
3.46  
3.43  
3.42  
3.41  
3.40  
3.31  
3.30  
3.27  
3.26  
3.24  
3.08  
3.07  
3.06  
3.05  
3.04  
3.03

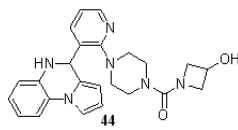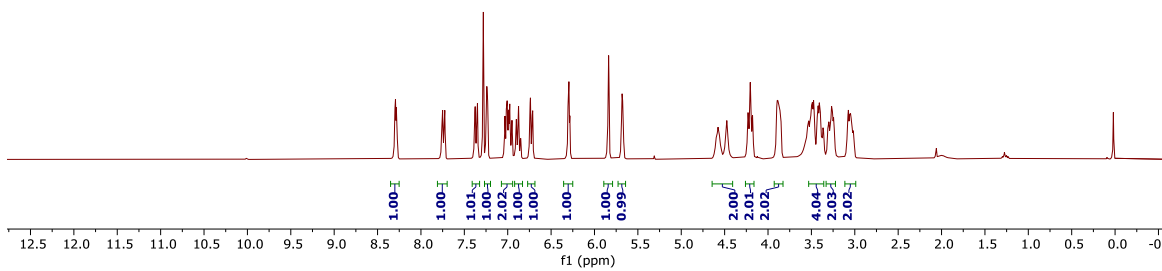

162.4  
161.1  
147.7  
139.2  
136.3  
129.6  
128.7  
125.7  
124.8  
119.9  
118.7  
115.6  
115.0  
114.9  
110.1  
106.1  
61.8  
61.0  
51.6  
50.4  
44.8

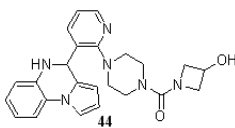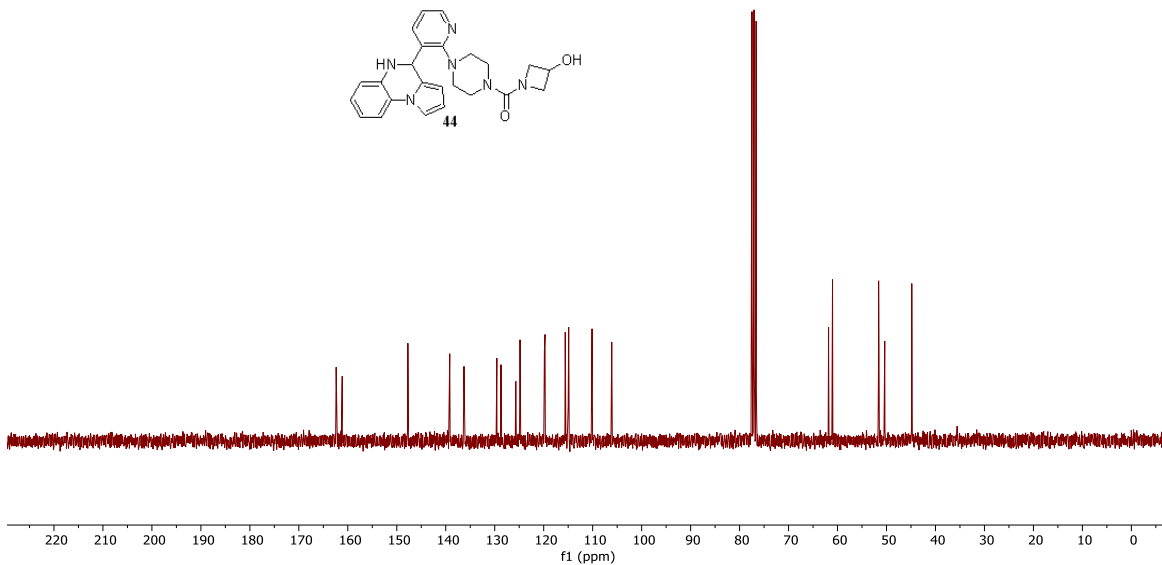

8.31  
8.30  
8.29  
8.29  
8.28  
7.68  
7.67  
7.65  
7.65  
7.64  
7.37  
7.35  
7.25  
7.24  
7.24  
7.23  
7.23  
6.99  
6.97  
6.96  
6.95  
6.95  
6.88  
6.87  
6.87  
6.86  
6.74  
6.73  
6.73  
6.71  
6.71  
6.70  
6.62  
6.31  
6.30  
6.30  
6.22  
5.82  
5.74  
5.73  
4.59  
3.73  
3.72  
3.70  
3.40  
3.39  
3.37  
3.36  
3.35  
3.34  
3.16  
3.12  
3.12  
3.11  
3.09  
3.09  
2.70  
2.68  
2.64  
2.63  
2.61  
2.60  
2.59  
2.59  
2.57  
2.57  
2.56  
2.55  
2.55  
2.52  
2.51  
2.49

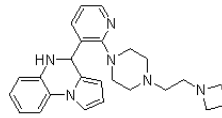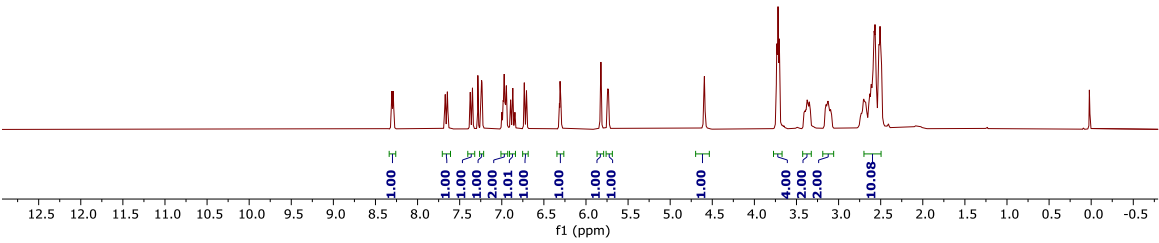

161.4  
147.6  
138.8  
136.4  
129.2  
128.7  
125.7  
124.7  
119.6  
119.2  
115.6  
114.9  
114.8  
110.1  
106.2  
67.0  
56.3  
54.7  
53.2  
53.9  
51.6  
50.5

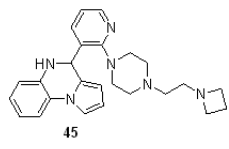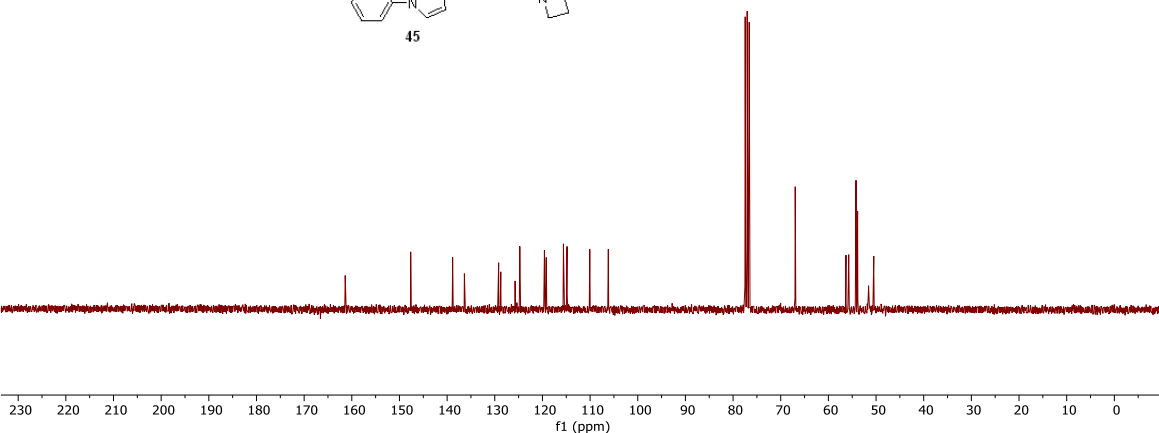

8.30  
8.29  
8.28  
8.27  
7.87  
7.86  
7.84  
7.83  
7.82  
7.81  
7.80  
7.79  
7.78  
7.77  
7.76  
7.75  
7.74  
7.73  
7.72  
7.71  
7.70  
7.69  
7.68  
7.67  
7.66  
7.65  
7.64  
7.63  
7.62  
7.61  
7.60  
7.59  
7.58  
7.57  
7.56  
7.55  
7.54  
7.53  
7.52  
7.51  
7.50  
7.49  
7.48  
7.47  
7.46  
7.45  
7.44  
7.43  
7.42  
7.41  
7.40  
7.39  
7.38  
7.37  
7.36  
7.35  
7.34  
7.33  
7.32  
7.31  
7.30  
7.29  
7.28  
7.27  
7.26  
7.25  
7.24  
7.23  
7.22  
7.21  
7.20  
7.19  
7.18  
7.17  
7.16  
7.15  
7.14  
7.13  
7.12  
7.11  
7.10  
7.09  
7.08  
7.07  
7.06  
7.05  
7.04  
7.03  
7.02  
7.01  
7.00  
6.99  
6.98  
6.97  
6.96  
6.95  
6.94  
6.93  
6.92  
6.91  
6.90  
6.89  
6.88  
6.87  
6.86  
6.85  
6.84  
6.83  
6.82  
6.81  
6.80  
6.79  
6.78  
6.77  
6.76  
6.75  
6.74  
6.73  
6.72  
6.71  
6.70  
6.69  
6.68  
6.67  
6.66  
6.65  
6.64  
6.63  
6.62  
6.61  
6.60  
6.59  
6.58  
6.57  
6.56  
6.55  
6.54  
6.53  
6.52  
6.51  
6.50  
6.49  
6.48  
6.47  
6.46  
6.45  
6.44  
6.43  
6.42  
6.41  
6.40  
6.39  
6.38  
6.37  
6.36  
6.35  
6.34  
6.33  
6.32  
6.31  
6.30  
6.29  
6.28  
6.27  
6.26  
6.25  
6.24  
6.23  
6.22  
6.21  
6.20  
6.19  
6.18  
6.17  
6.16  
6.15  
6.14  
6.13  
6.12  
6.11  
6.10  
6.09  
6.08  
6.07  
6.06  
6.05  
6.04  
6.03  
6.02  
6.01  
6.00  
5.99  
5.98  
5.97  
5.96  
5.95  
5.94  
5.93  
5.92  
5.91  
5.90  
5.89  
5.88  
5.87  
5.86  
5.85  
5.84  
5.83  
5.82  
5.81  
5.80  
5.79  
5.78  
5.77  
5.76  
5.75  
5.74  
5.73  
5.72  
5.71  
5.70  
5.69  
5.68  
5.67  
5.66  
5.65  
5.64  
5.63  
5.62  
5.61  
5.60  
5.59  
5.58  
5.57  
5.56  
5.55  
5.54  
5.53  
5.52  
5.51  
5.50  
5.49  
5.48  
5.47  
5.46  
5.45  
5.44  
5.43  
5.42  
5.41  
5.40  
5.39  
5.38  
5.37  
5.36  
5.35  
5.34  
5.33  
5.32  
5.31  
5.30  
5.29  
5.28  
5.27  
5.26  
5.25  
5.24  
5.23  
5.22  
5.21  
5.20  
5.19  
5.18  
5.17  
5.16  
5.15  
5.14  
5.13  
5.12  
5.11  
5.10  
5.09  
5.08  
5.07  
5.06  
5.05  
5.04  
5.03  
5.02  
5.01  
5.00  
4.99  
4.98  
4.97  
4.96  
4.95  
4.94  
4.93  
4.92  
4.91  
4.90  
4.89  
4.88  
4.87  
4.86  
4.85  
4.84  
4.83  
4.82  
4.81  
4.80  
4.79  
4.78  
4.77  
4.76  
4.75  
4.74  
4.73  
4.72  
4.71  
4.70  
4.69  
4.68  
4.67  
4.66  
4.65  
4.64  
4.63  
4.62  
4.61  
4.60  
4.59  
4.58  
4.57  
4.56  
4.55  
4.54  
4.53  
4.52  
4.51  
4.50  
4.49  
4.48  
4.47  
4.46  
4.45  
4.44  
4.43  
4.42  
4.41  
4.40  
4.39  
4.38  
4.37  
4.36  
4.35  
4.34  
4.33  
4.32  
4.31  
4.30  
4.29  
4.28  
4.27  
4.26  
4.25  
4.24  
4.23  
4.22  
4.21  
4.20  
4.19  
4.18  
4.17  
4.16  
4.15  
4.14  
4.13  
4.12  
4.11  
4.10  
4.09  
4.08  
4.07  
4.06  
4.05  
4.04  
4.03  
4.02  
4.01  
4.00  
3.99  
3.98  
3.97  
3.96  
3.95  
3.94  
3.93  
3.92  
3.91  
3.90  
3.89  
3.88  
3.87  
3.86  
3.85  
3.84  
3.83  
3.82  
3.81  
3.80  
3.79  
3.78  
3.77  
3.76  
3.75  
3.74  
3.73  
3.72  
3.71  
3.70  
3.69  
3.68  
3.67  
3.66  
3.65  
3.64  
3.63  
3.62  
3.61  
3.60  
3.59  
3.58  
3.57  
3.56  
3.55  
3.54  
3.53  
3.52  
3.51  
3.50  
3.49  
3.48  
3.47  
3.46  
3.45  
3.44  
3.43  
3.42  
3.41  
3.40  
3.39  
3.38  
3.37  
3.36  
3.35  
3.34  
3.33  
3.32  
3.31  
3.30  
3.29  
3.28  
3.27  
3.26  
3.25  
3.24  
3.23  
3.22  
3.21  
3.20  
3.19  
3.18  
3.17  
3.16  
3.15  
3.14  
3.13  
3.12  
3.11  
3.10  
3.09  
3.08  
3.07  
3.06  
3.05  
3.04  
3.03  
3.02  
3.01  
3.00  
2.99  
2.98  
2.97  
2.96  
2.95  
2.94  
2.93  
2.92  
2.91  
2.90  
2.89  
2.88  
2.87  
2.86  
2.85  
2.84  
2.83  
2.82  
2.81  
2.80  
2.79  
2.78  
2.77  
2.76  
2.75  
2.74  
2.73  
2.72  
2.71  
2.70  
2.69  
2.68  
2.67  
2.66  
2.65  
2.64  
2.63  
2.62  
2.61  
2.60  
2.59  
2.58  
2.57  
2.56  
2.55  
2.54  
2.53  
2.52  
2.51  
2.50  
2.49  
2.48  
2.47  
2.46  
2.45  
2.44

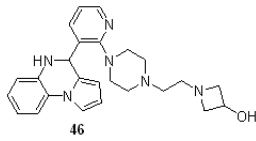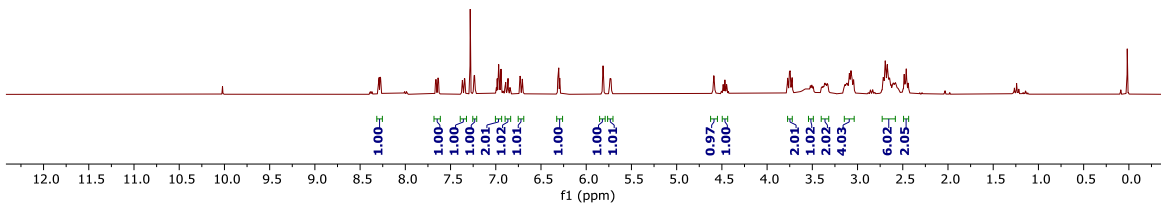

161.3  
147.6  
138.8  
136.3  
133.2  
128.2  
125.7  
124.7  
119.6  
119.3  
115.6  
114.9  
114.8  
110.1  
106.2  
64.7  
62.7  
56.3  
56.3  
53.7  
51.5  
50.5

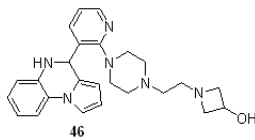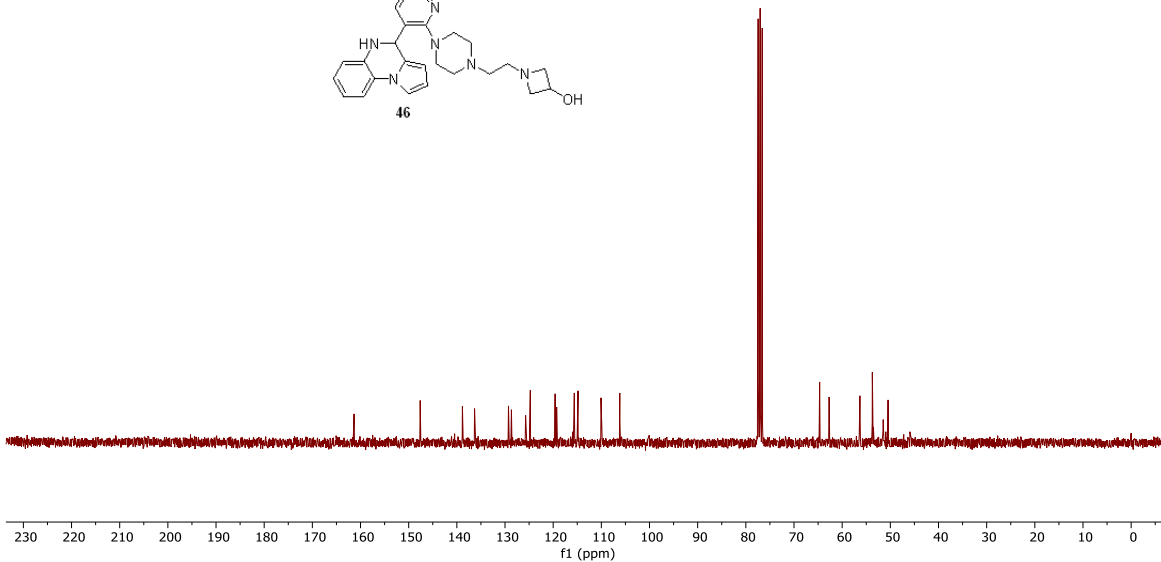

8.30  
8.29  
8.28  
7.85  
7.85  
7.82  
7.77  
7.34  
7.24  
7.24  
7.23  
7.23  
6.89  
6.87  
6.86  
6.86  
6.84  
6.84  
6.82  
6.82  
6.86  
6.86  
6.73  
6.73  
6.70  
6.70  
6.31  
6.30  
6.29  
5.82  
5.74  
5.73  
5.73  
5.72  
5.72  
3.50  
3.48  
3.45  
3.43  
3.43  
3.41  
3.38  
3.37  
3.36  
3.35  
3.33  
3.32  
3.31  
3.12  
3.11  
3.10  
2.70  
2.69  
2.68  
2.64  
2.63  
2.62  
2.61  
2.60  
2.57  
2.55  
2.41  
2.38  
2.36  
2.04  
2.04  
2.02  
2.01  
1.99  
1.98

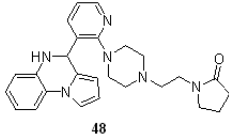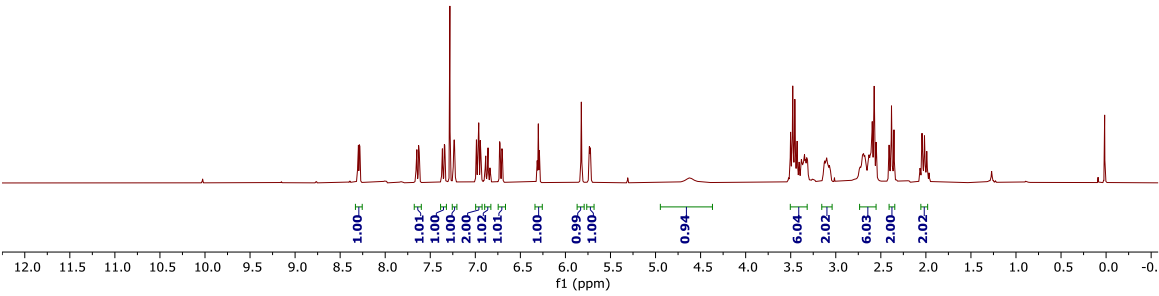

175.0  
161.4  
147.6  
138.8  
136.3  
129.5  
128.6  
125.7  
124.8  
119.6  
119.4  
115.6  
114.9  
114.3  
113.1  
106.2  
55.6  
53.3  
51.6  
50.4  
47.8  
39.6  
30.9  
18.0

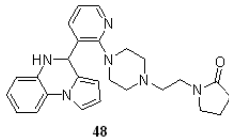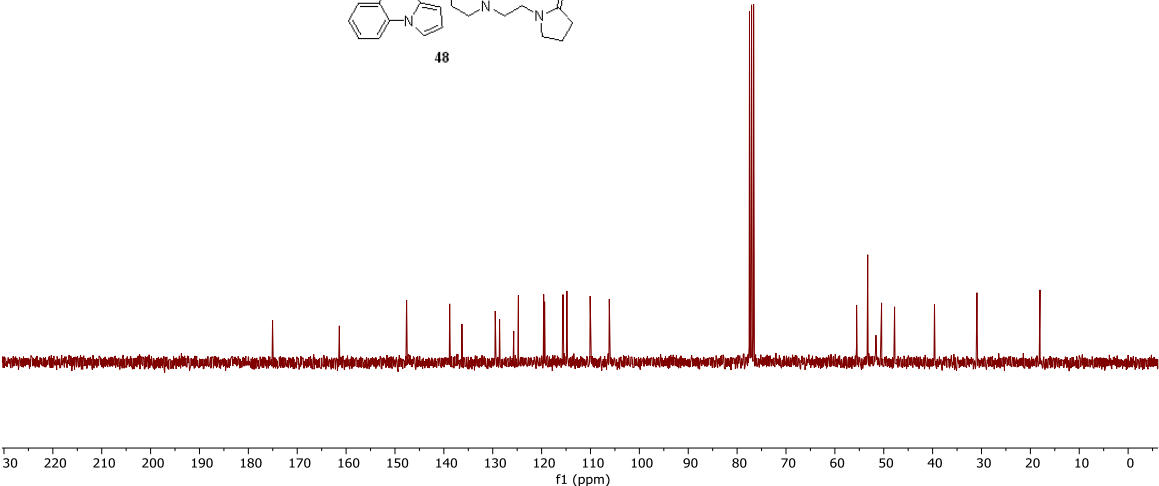

8.31  
8.30  
8.29  
8.28  
8.28  
7.69  
7.67  
7.65  
7.64  
7.57  
7.57  
7.35  
7.34  
7.24  
7.24  
7.23  
7.23  
6.88  
6.87  
6.87  
6.86  
6.84  
6.84  
6.83  
6.82  
6.73  
6.72  
6.70  
6.70  
6.31  
6.30  
6.29  
6.29  
5.82  
5.74  
5.74  
5.73  
5.72  
4.80  
4.79  
3.72  
3.70  
3.40  
3.39  
3.38  
3.37  
3.36  
3.35  
3.34  
3.16  
3.15  
3.13  
3.12  
3.12  
2.98  
2.98  
2.69  
2.68  
2.67  
2.63  
2.62  
2.61  
2.60  
2.59  
2.59  
2.58  
2.57  
2.56  
2.55  
2.54  
2.52  
2.51  
2.50  
2.49

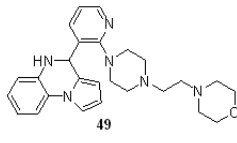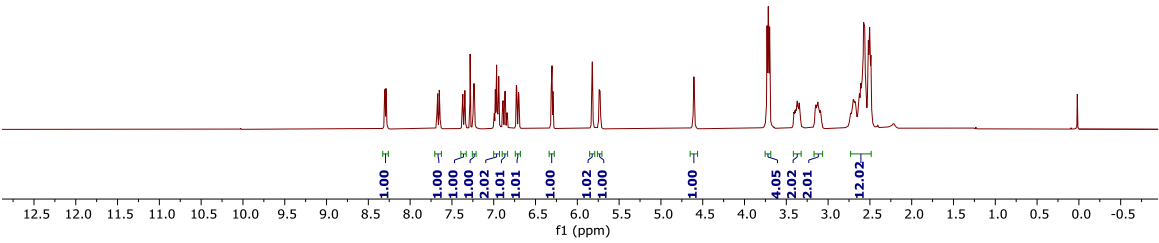

161.4  
147.6  
138.9  
136.4  
129.2  
128.8  
125.7  
124.7  
119.6  
115.6  
114.9  
114.8  
110.1  
106.2  
67.0  
56.3  
55.7  
54.2  
53.9  
51.6  
50.5

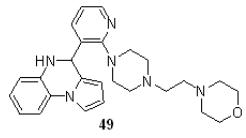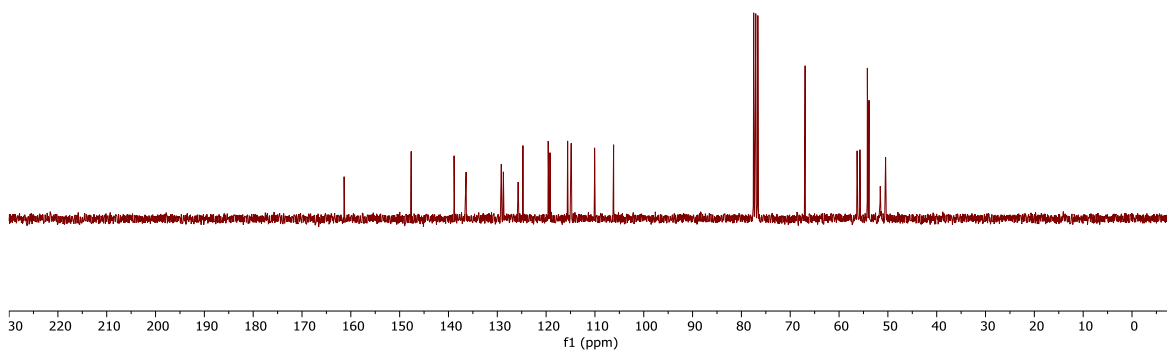

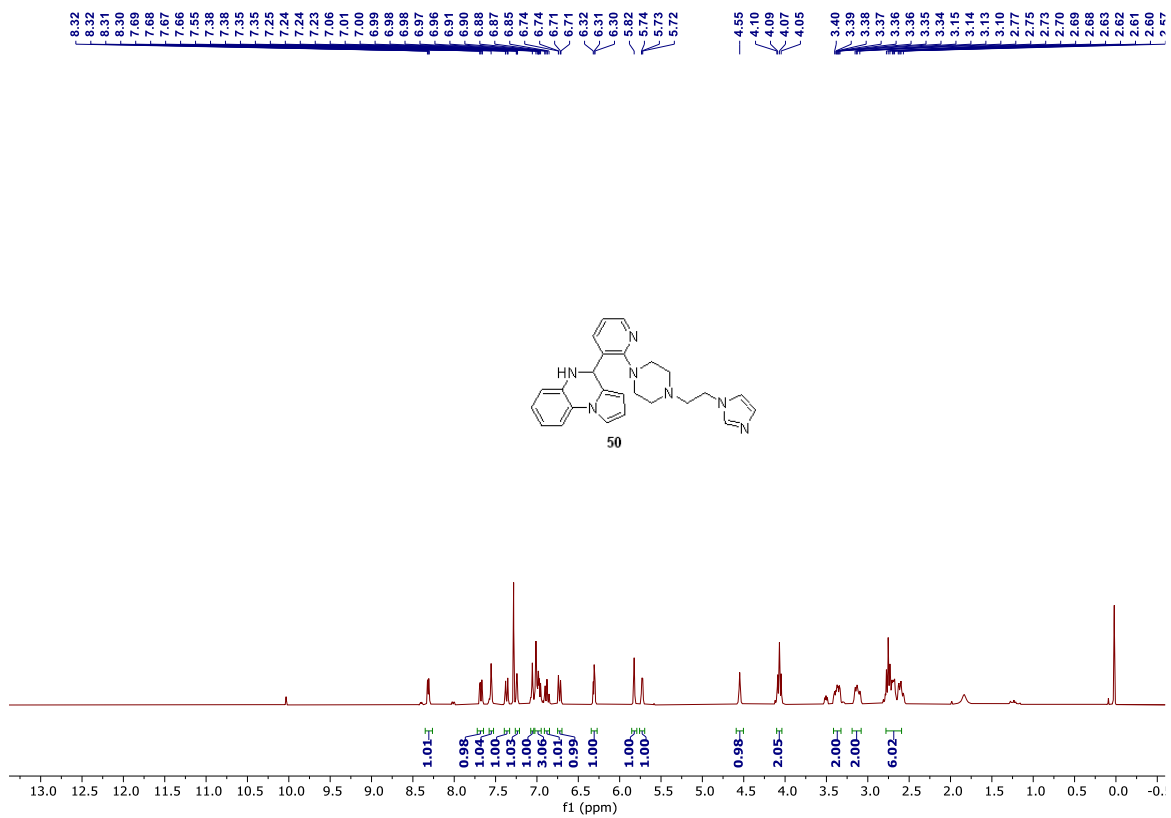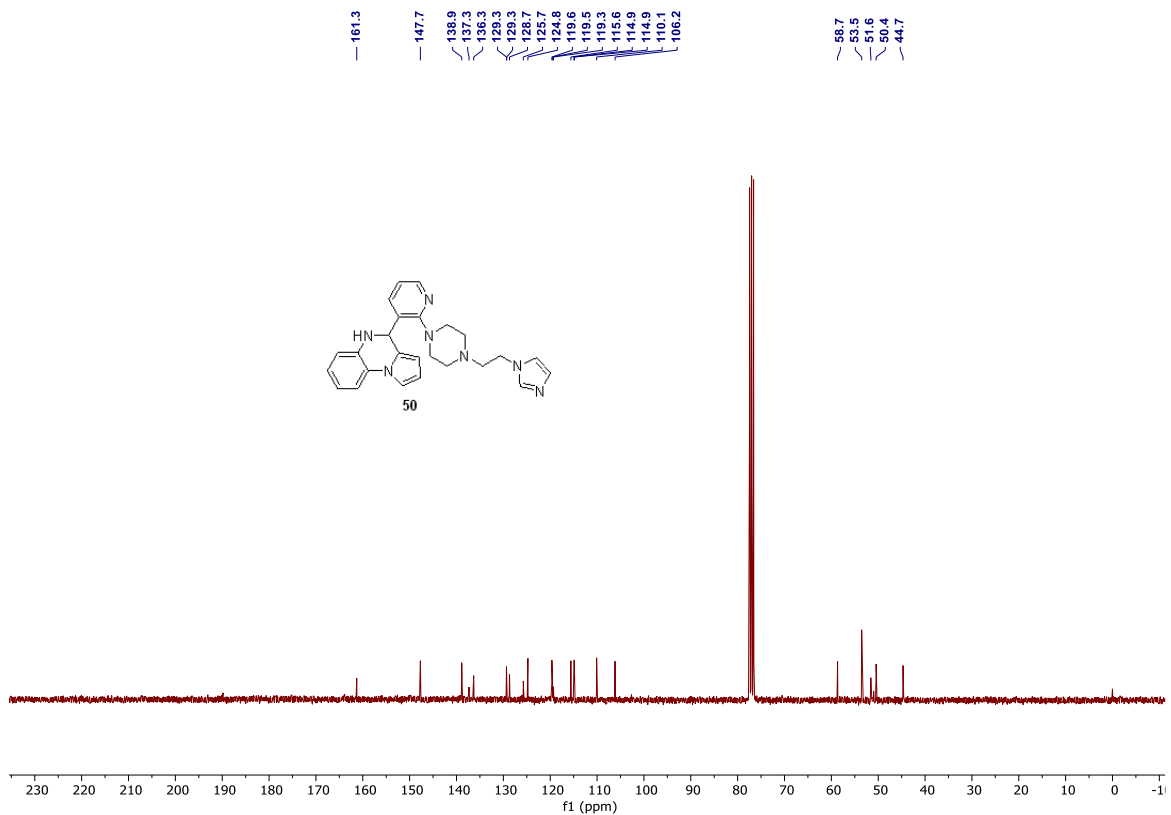



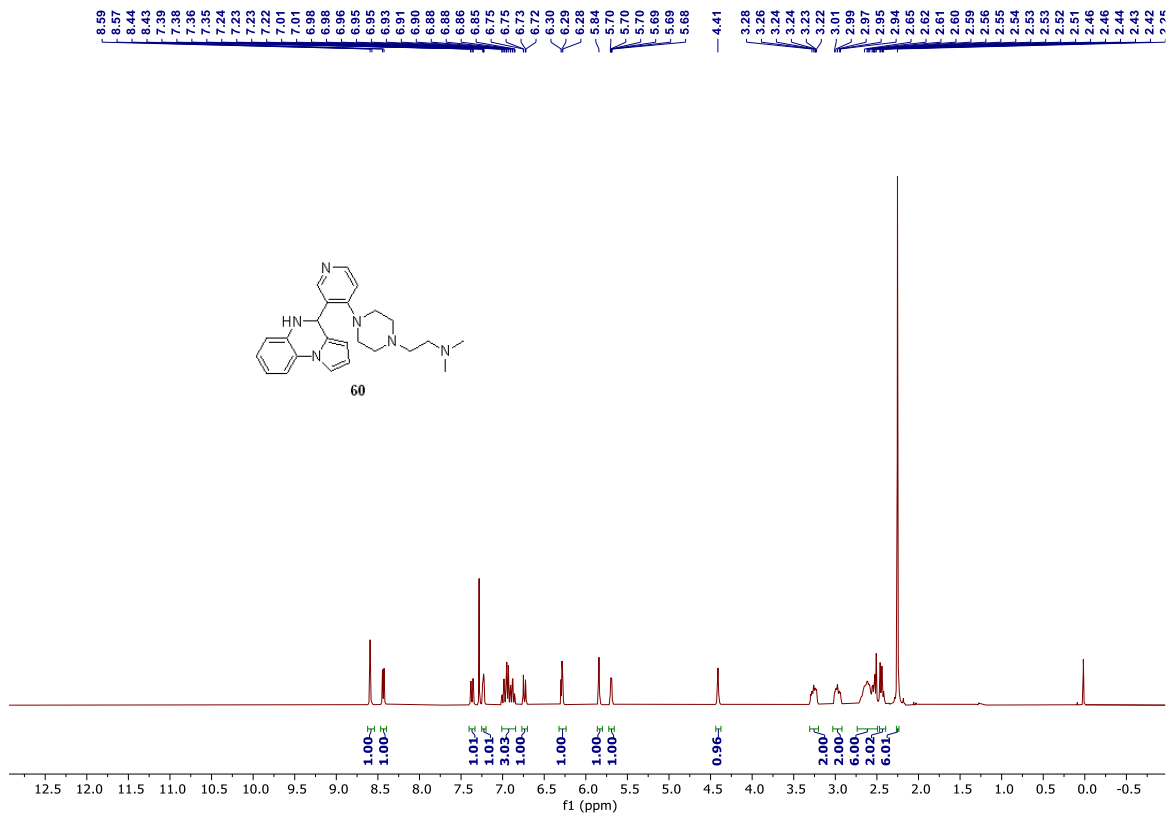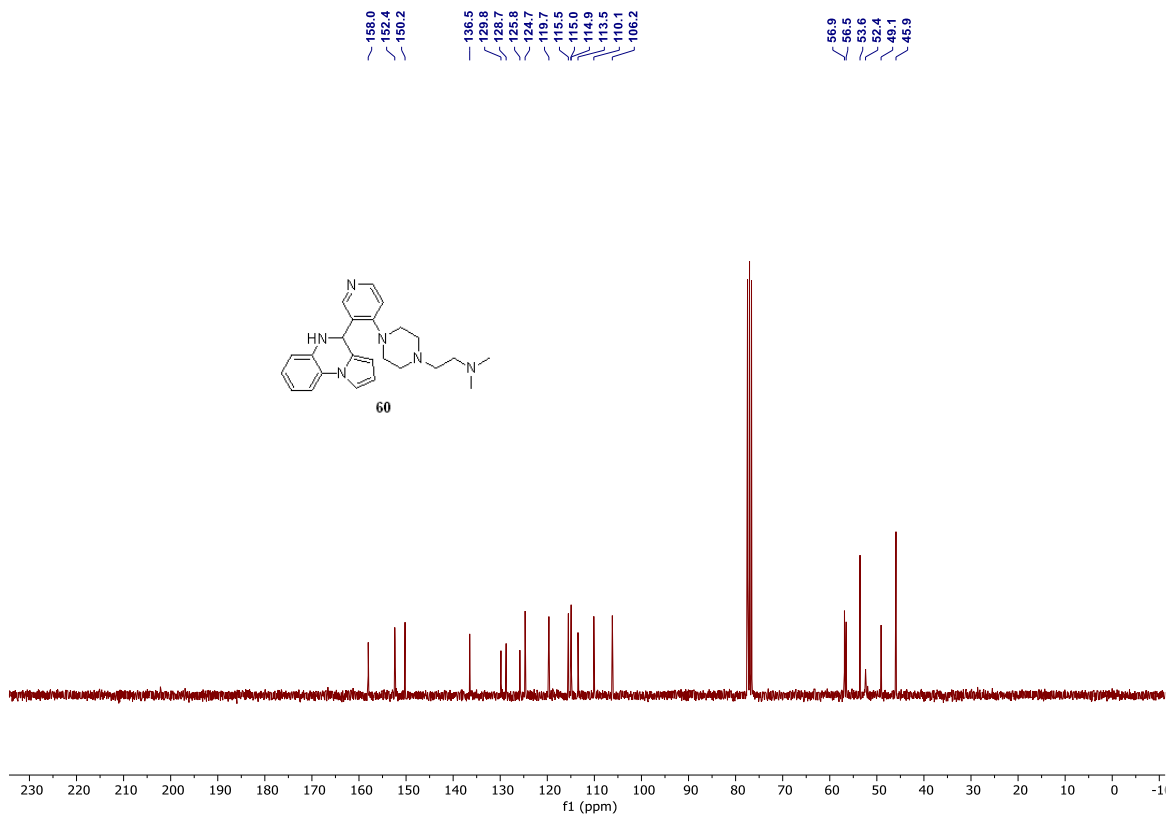

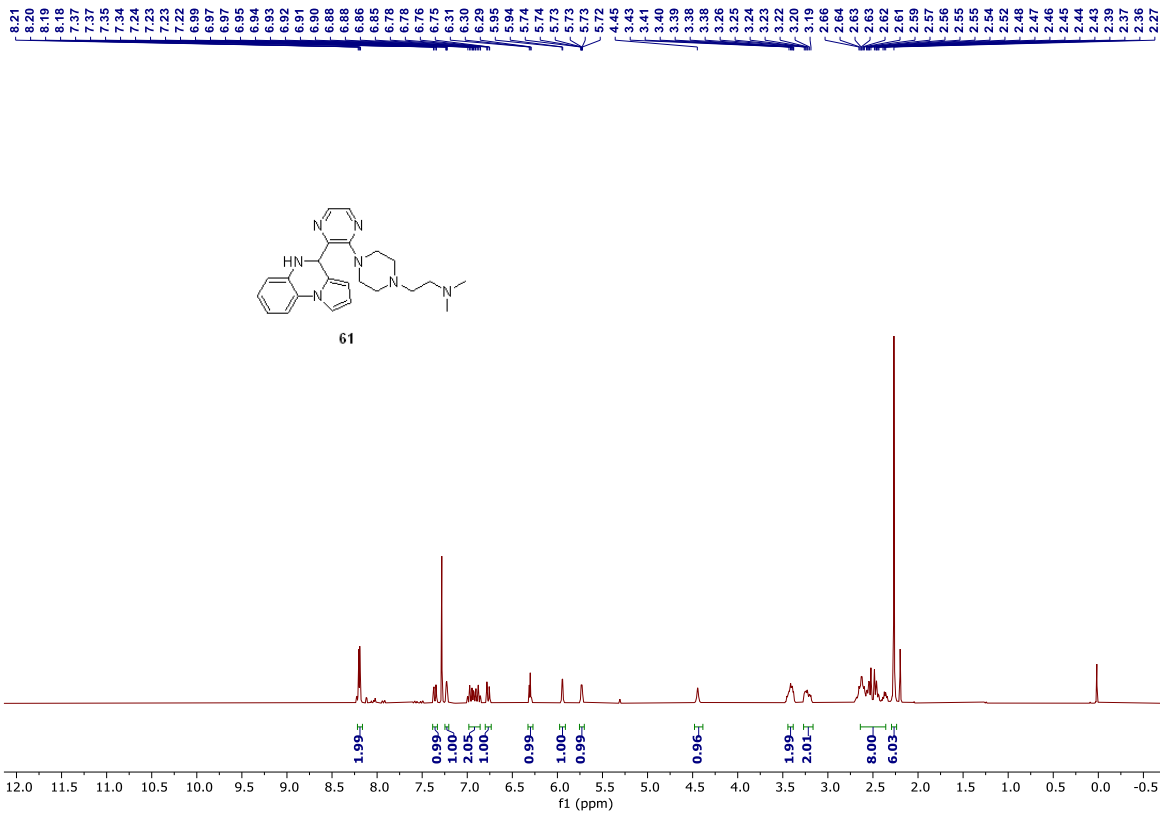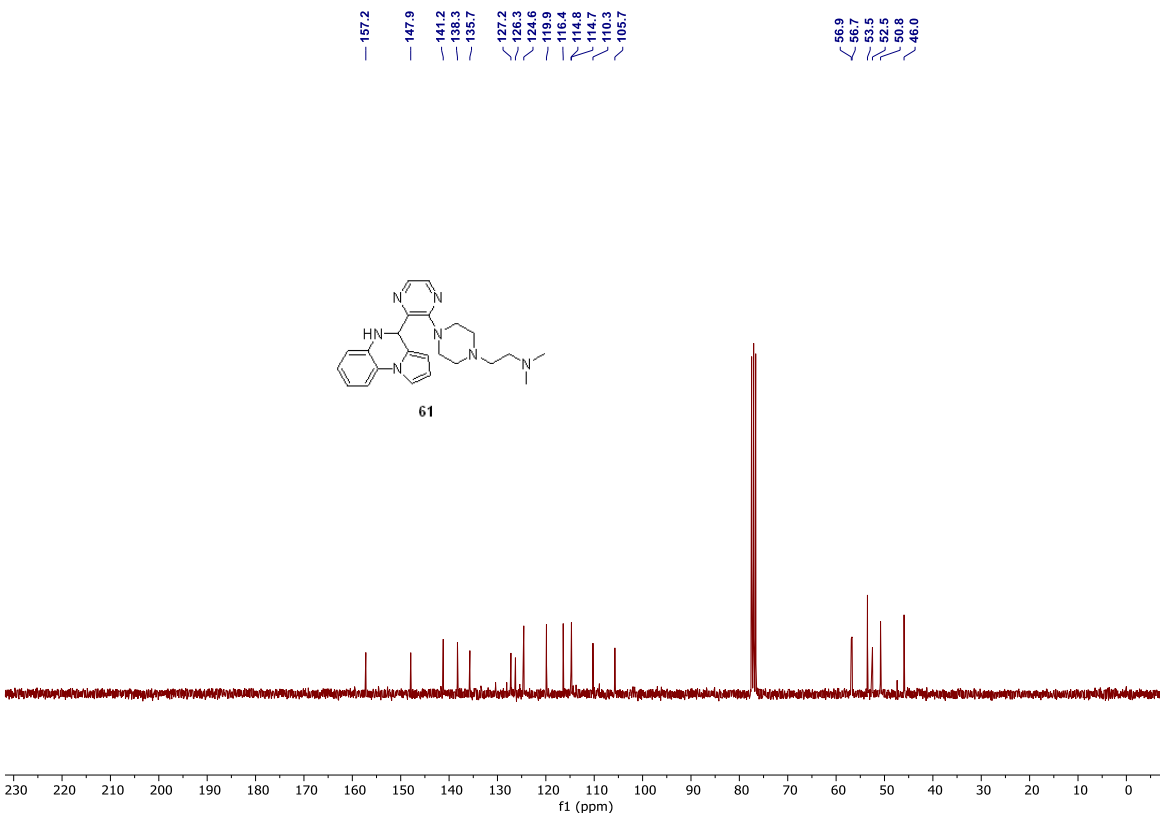

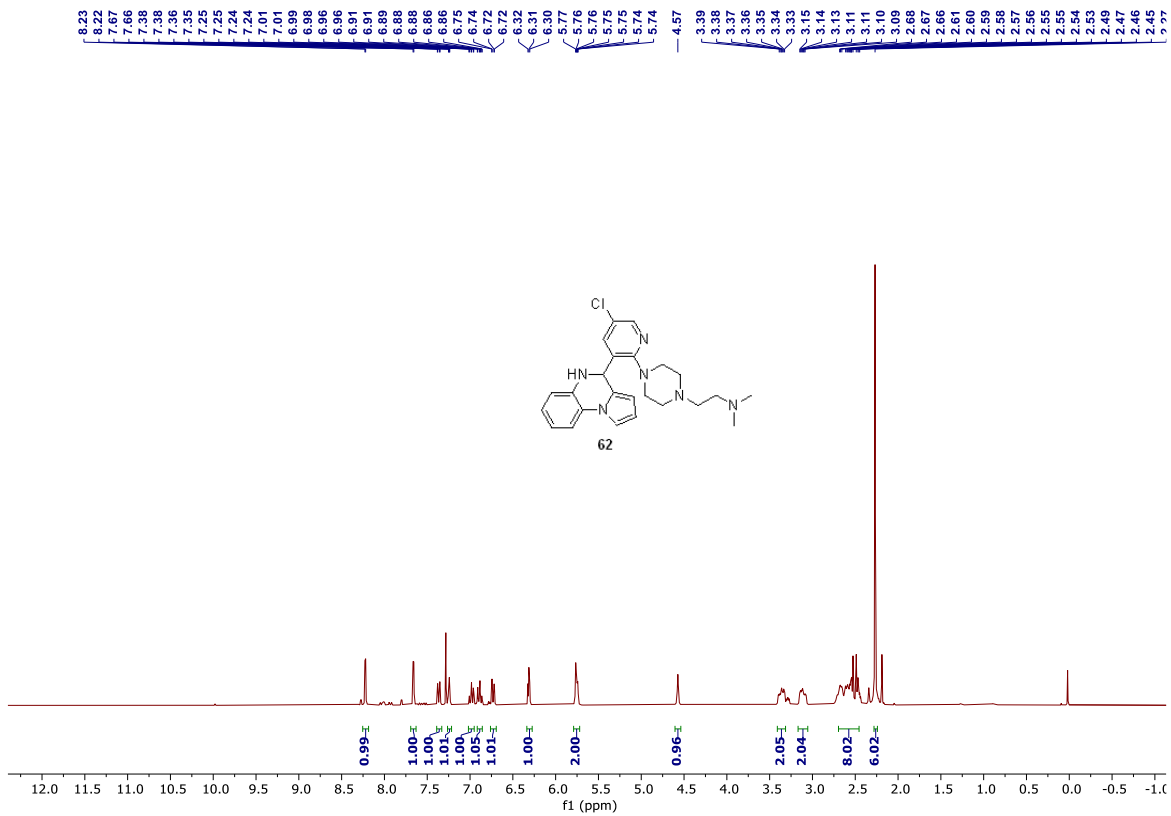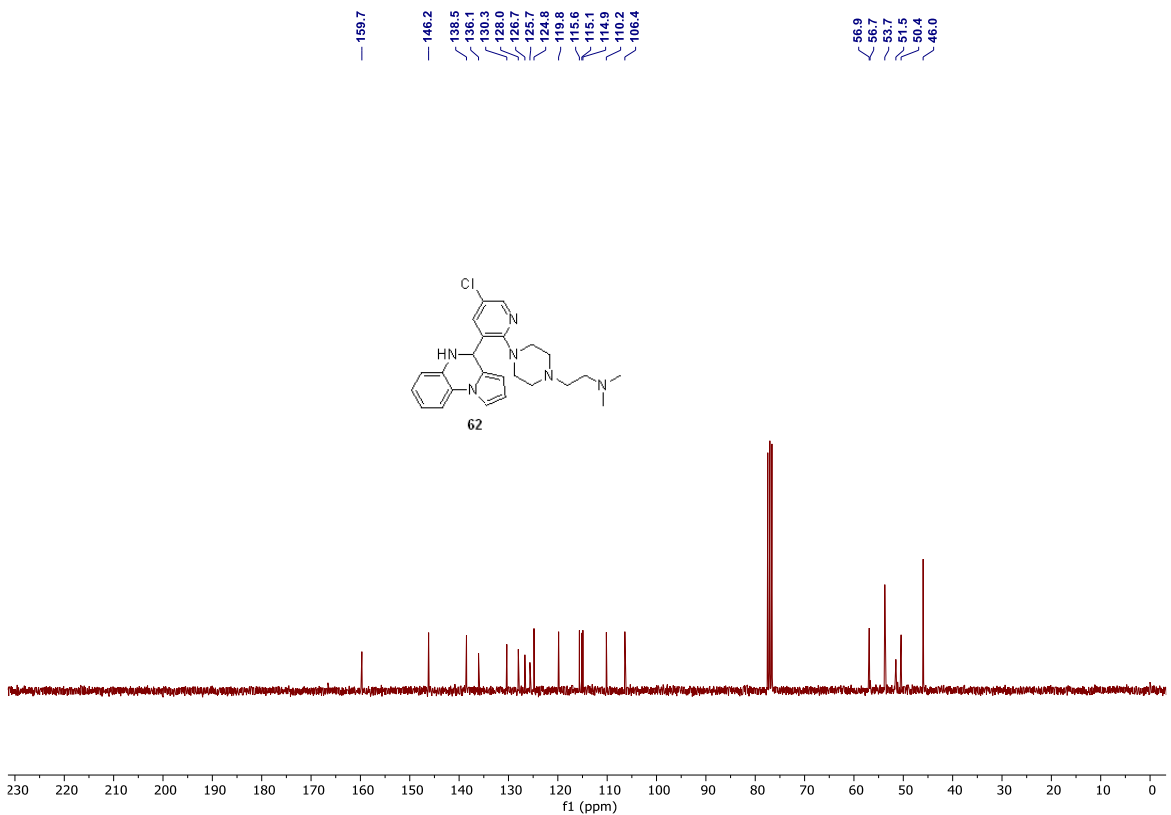

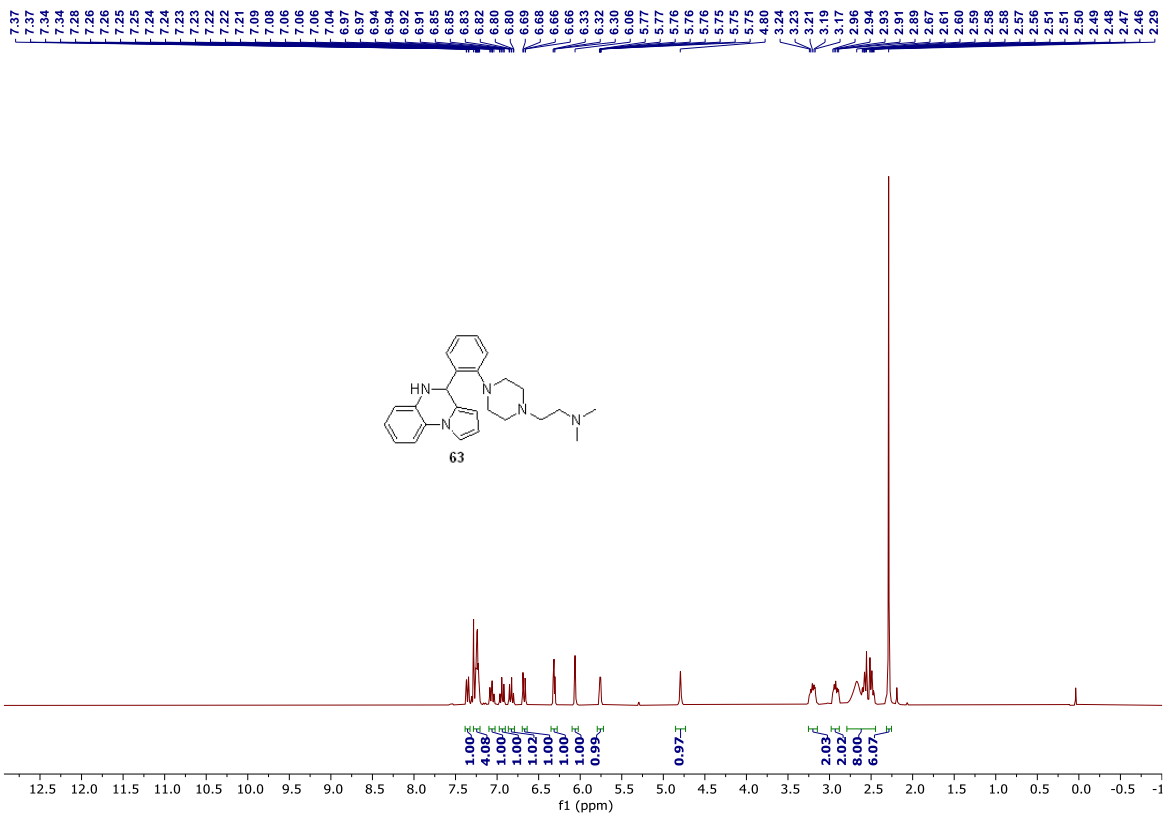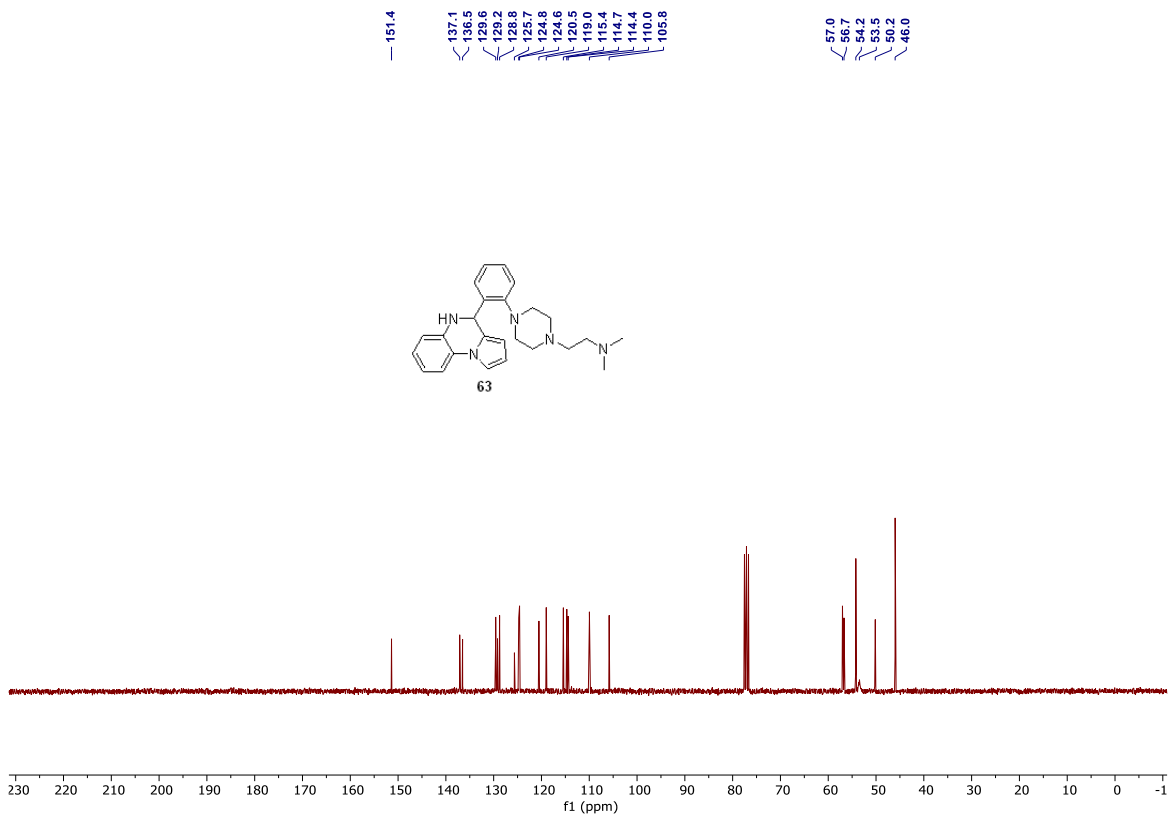

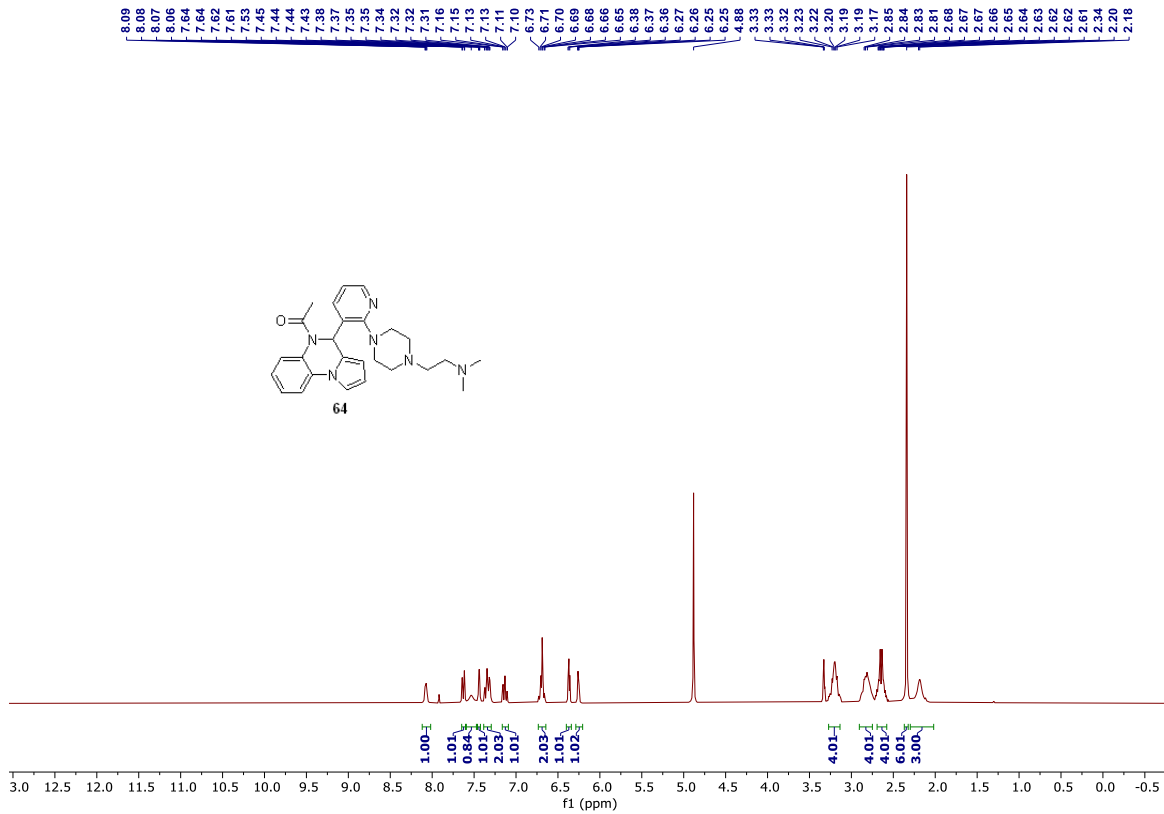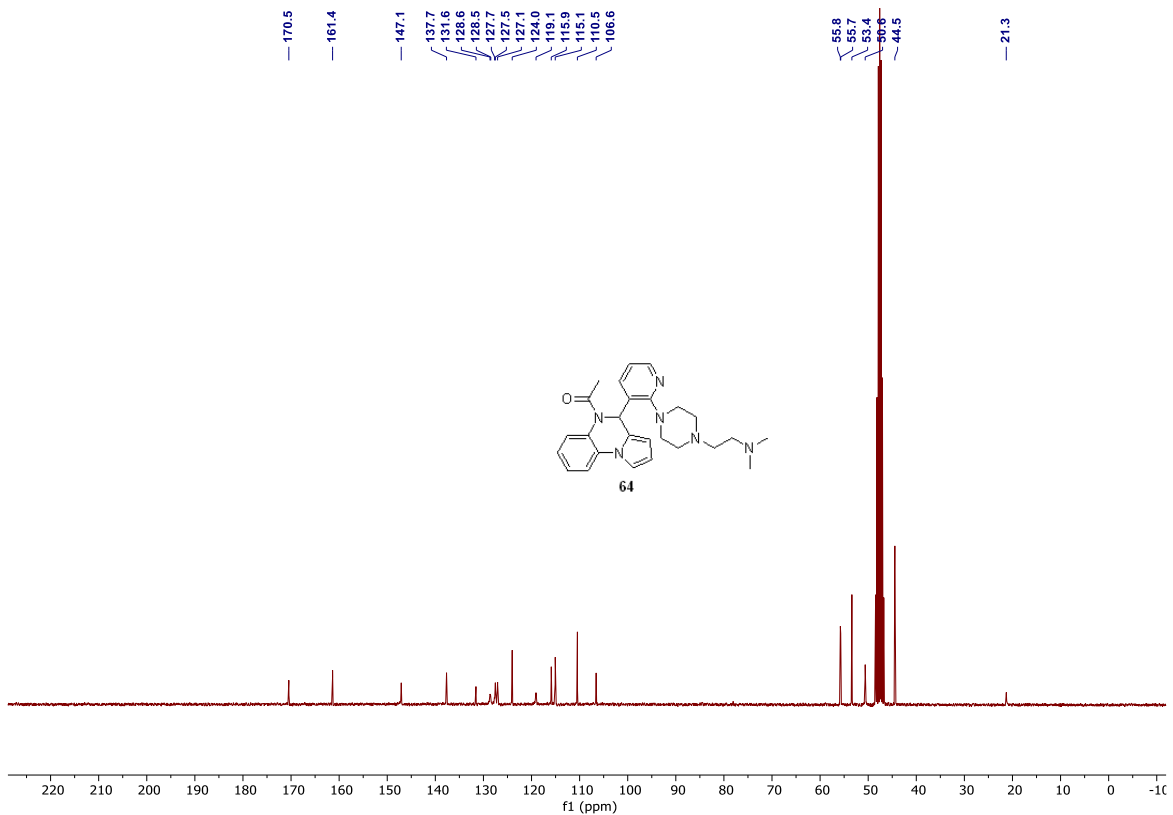

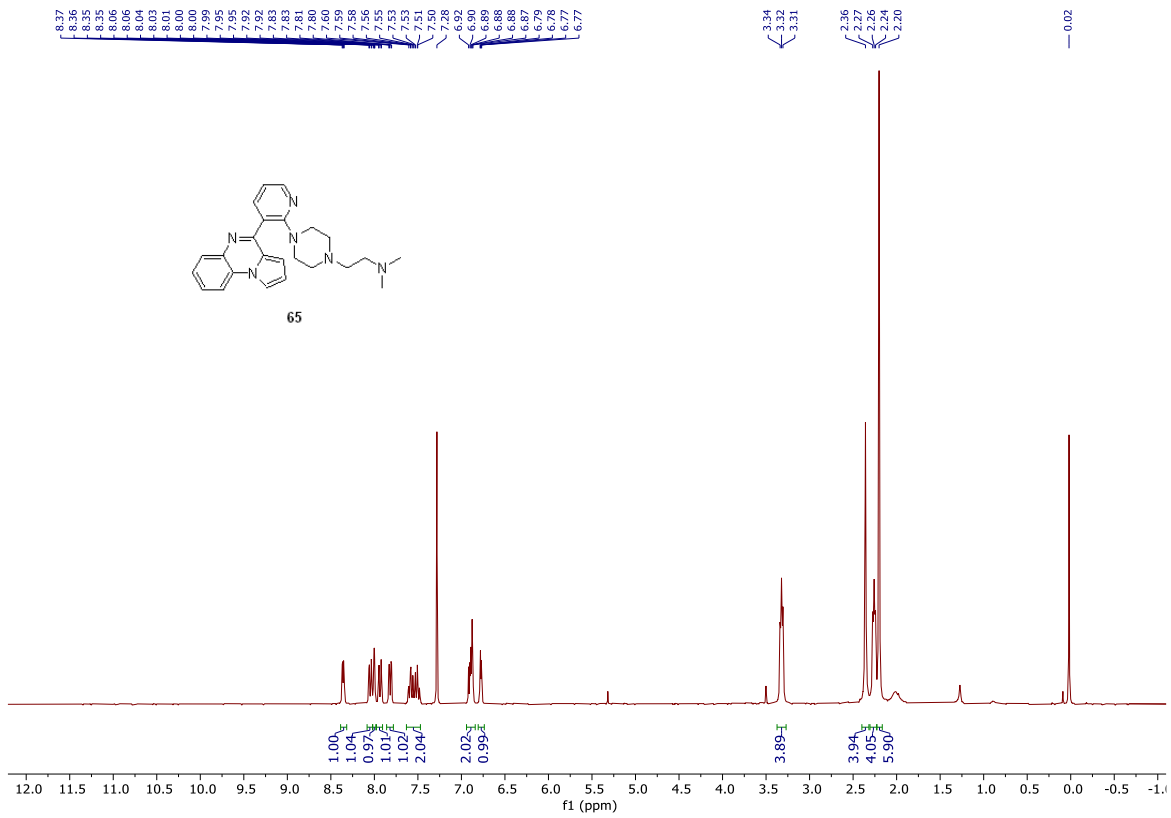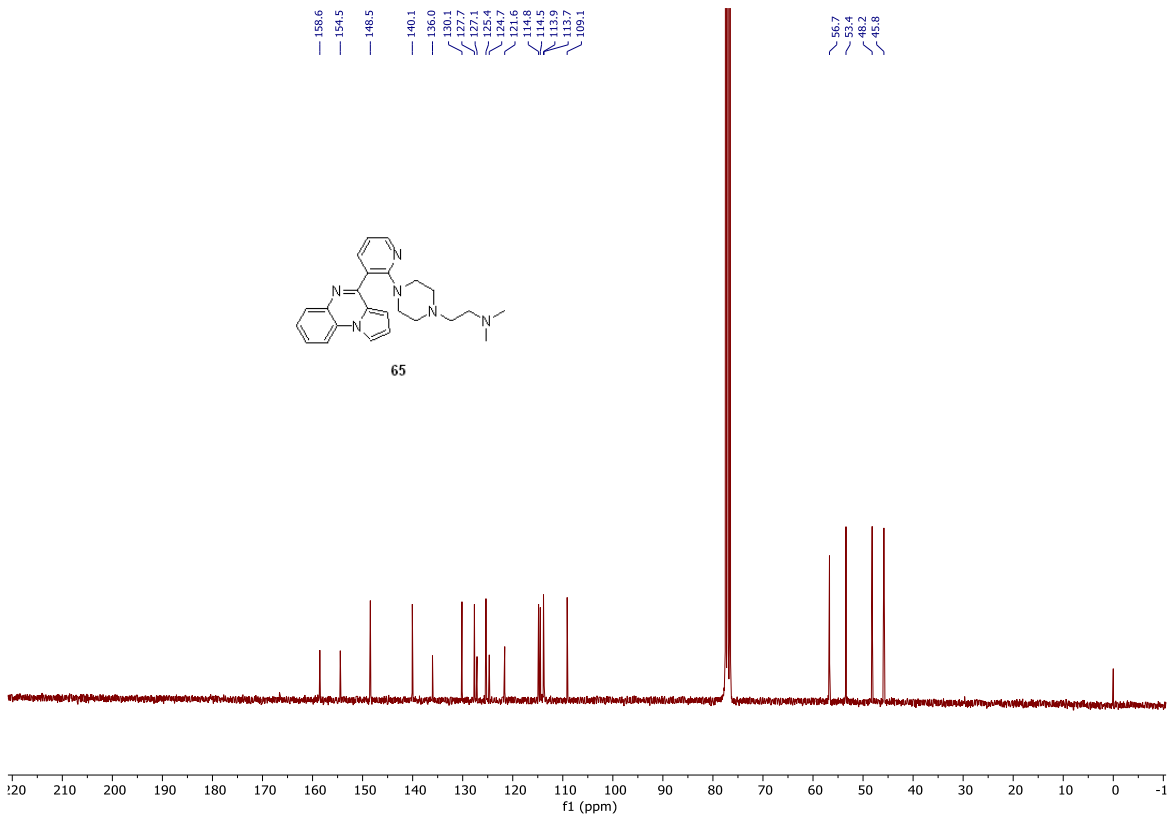

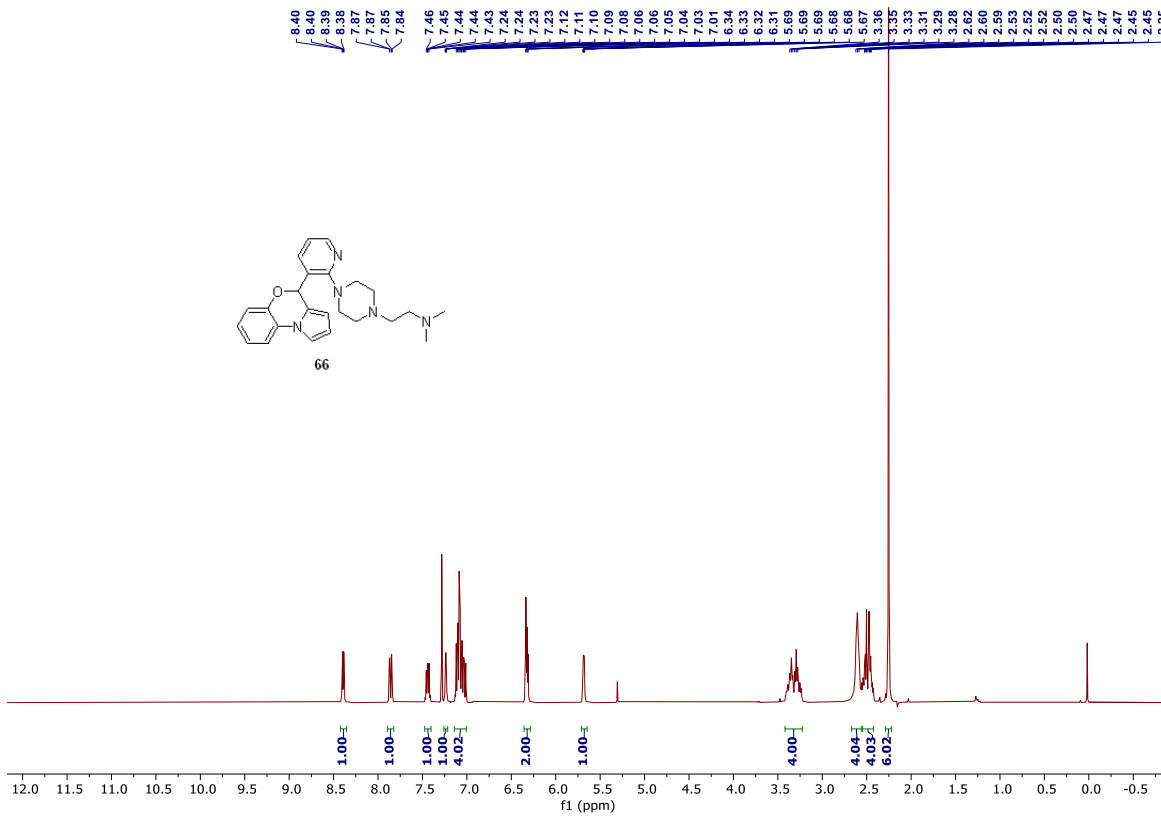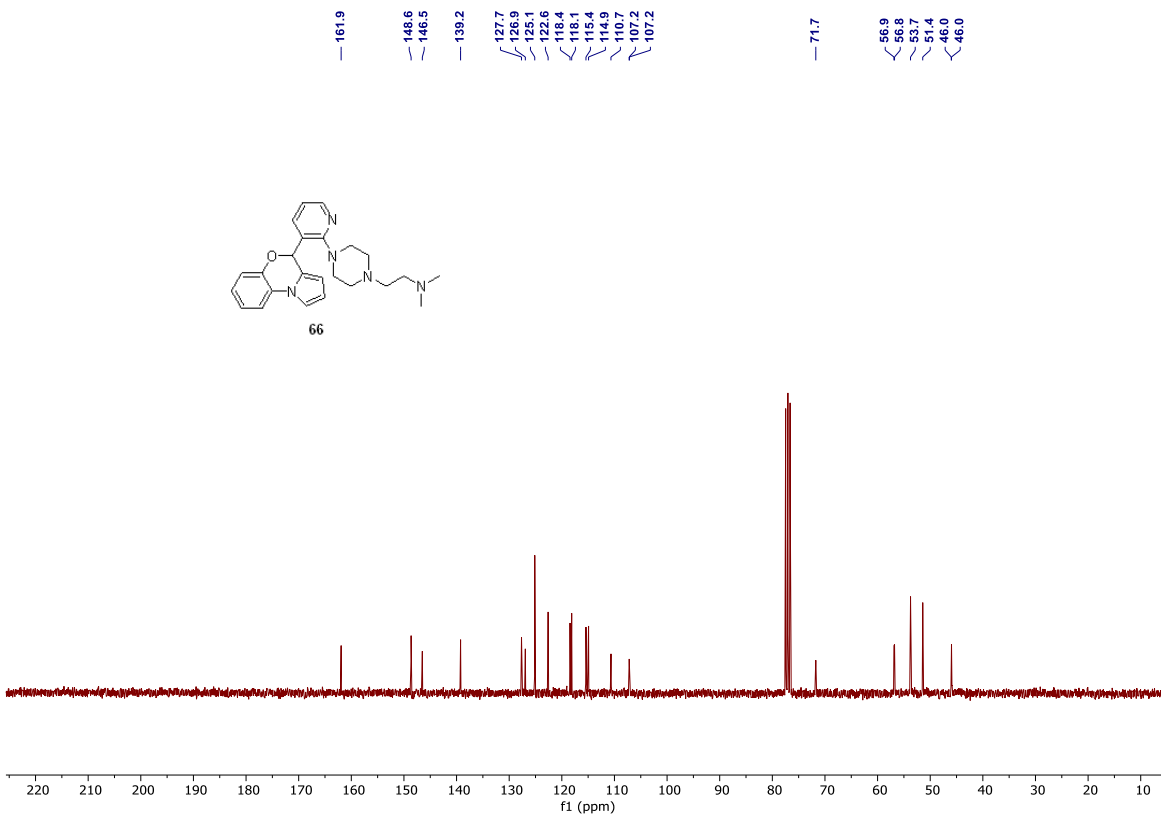

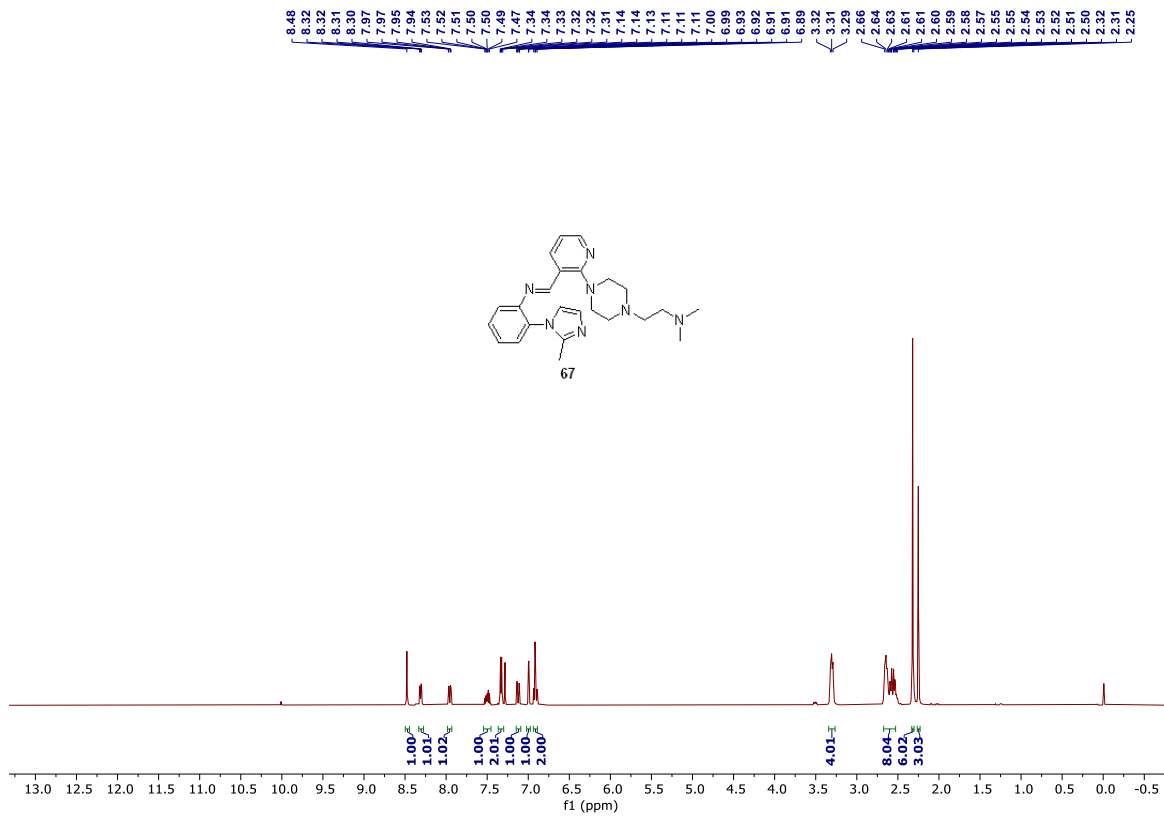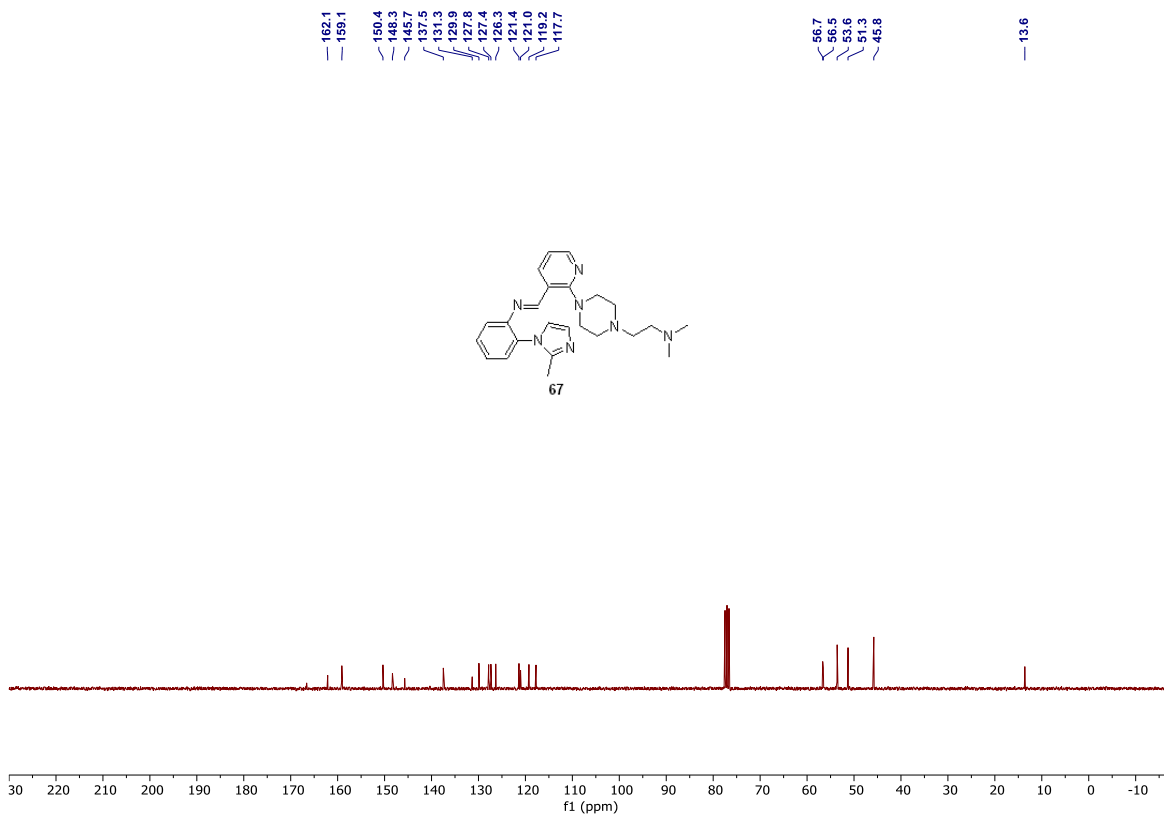



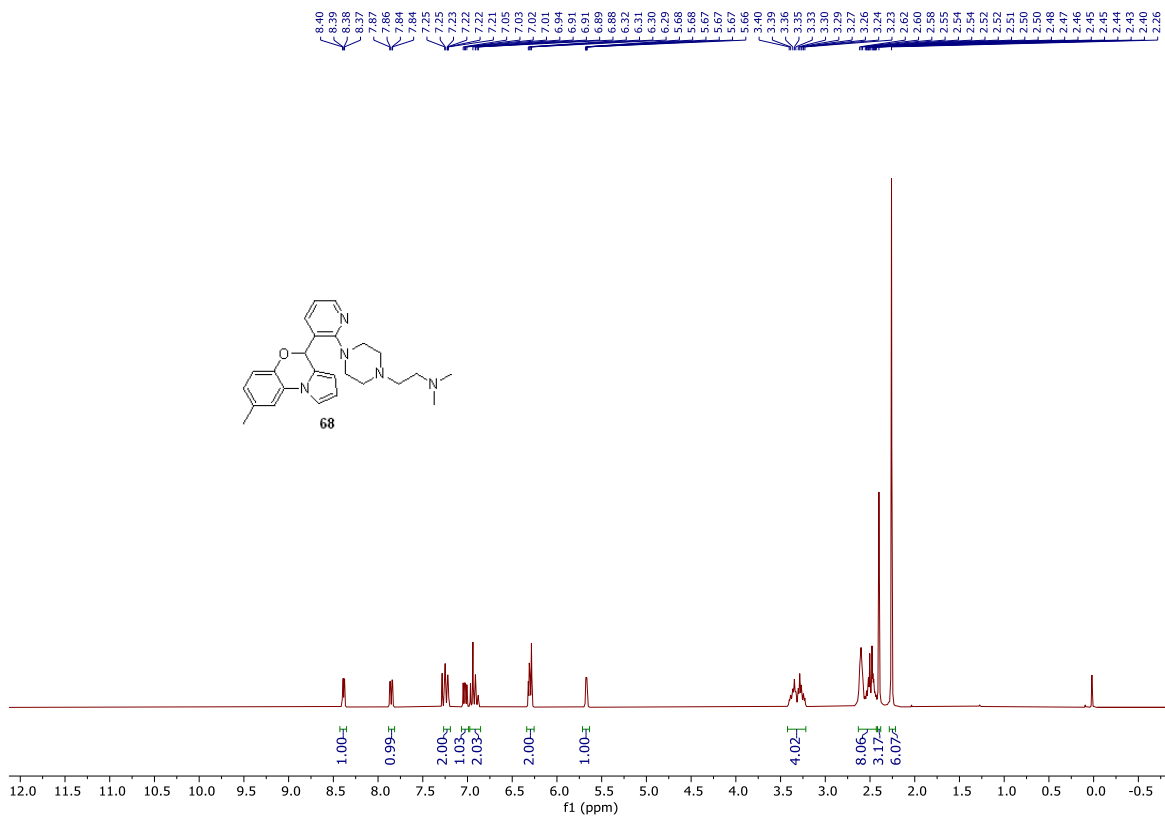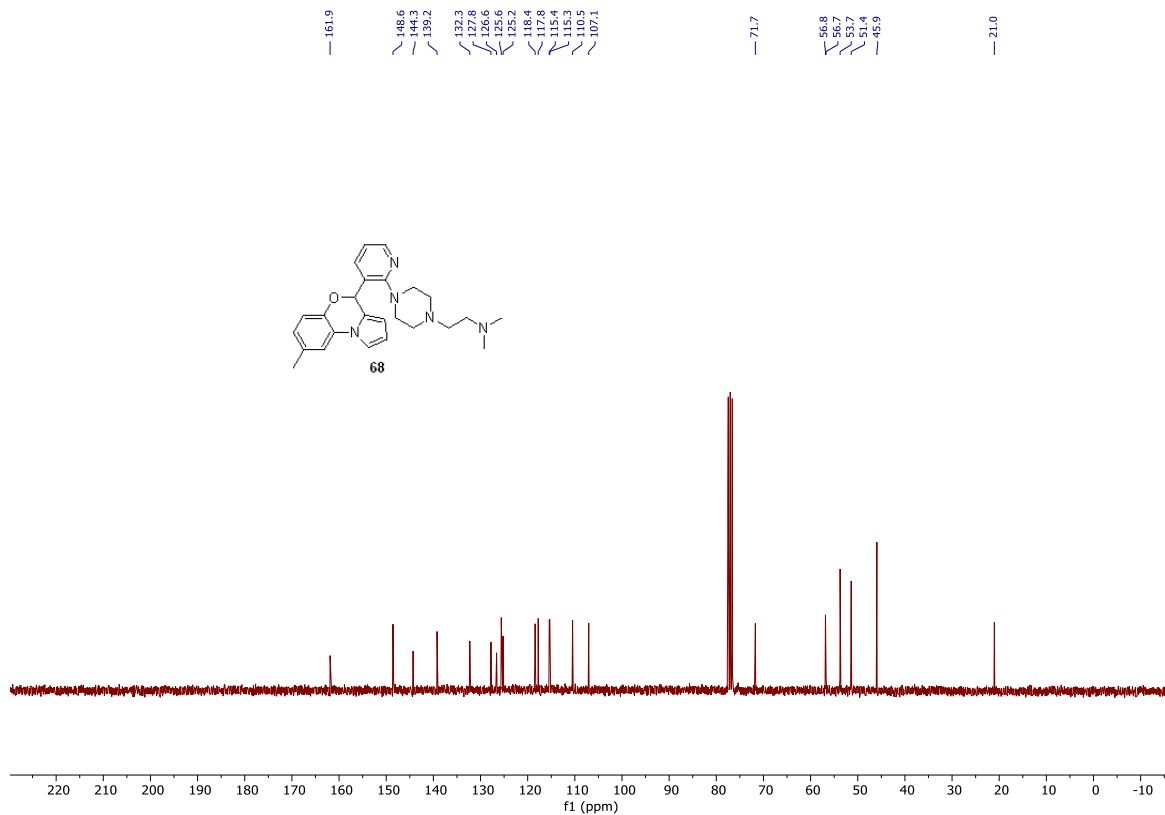

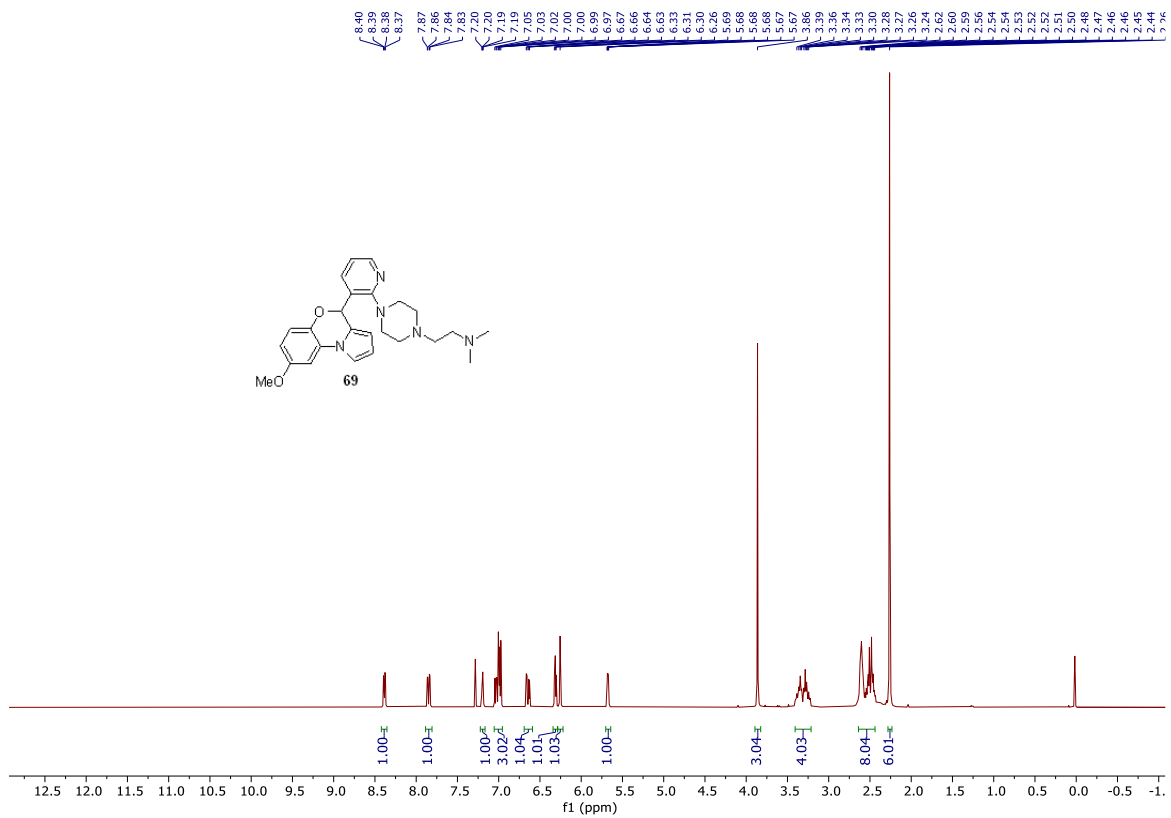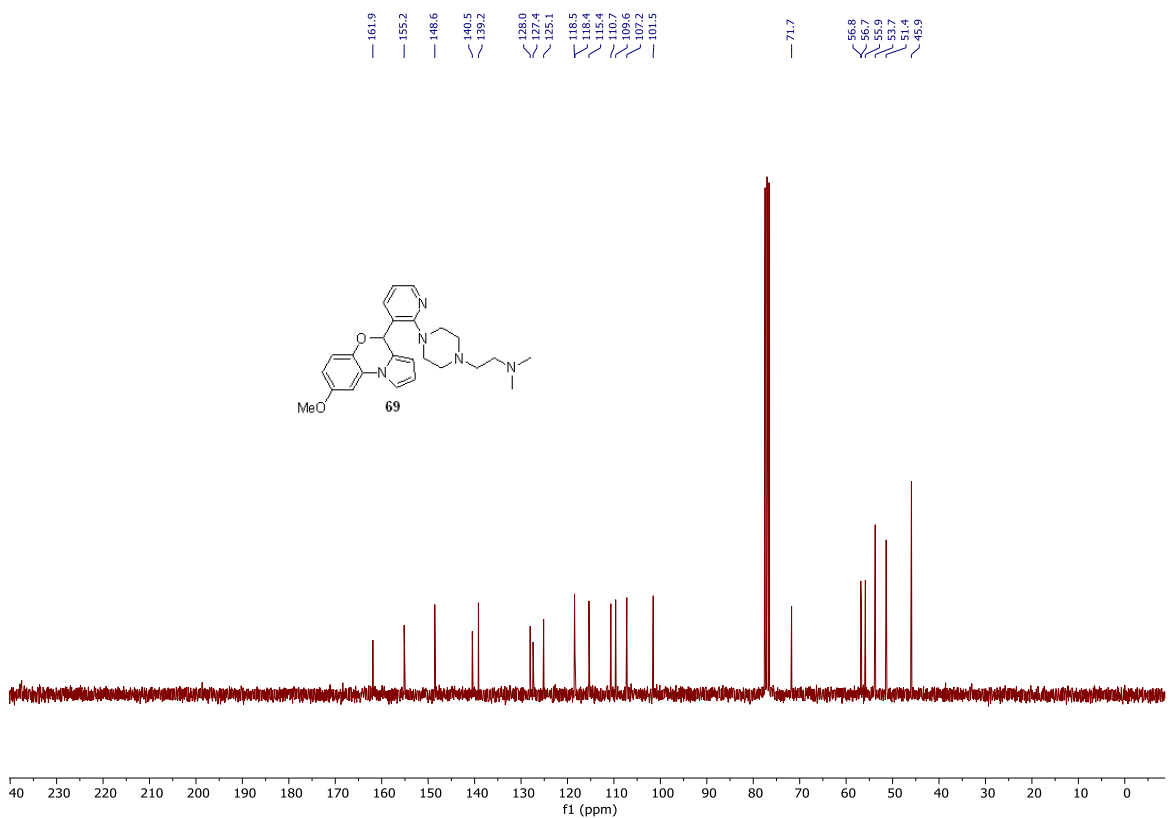

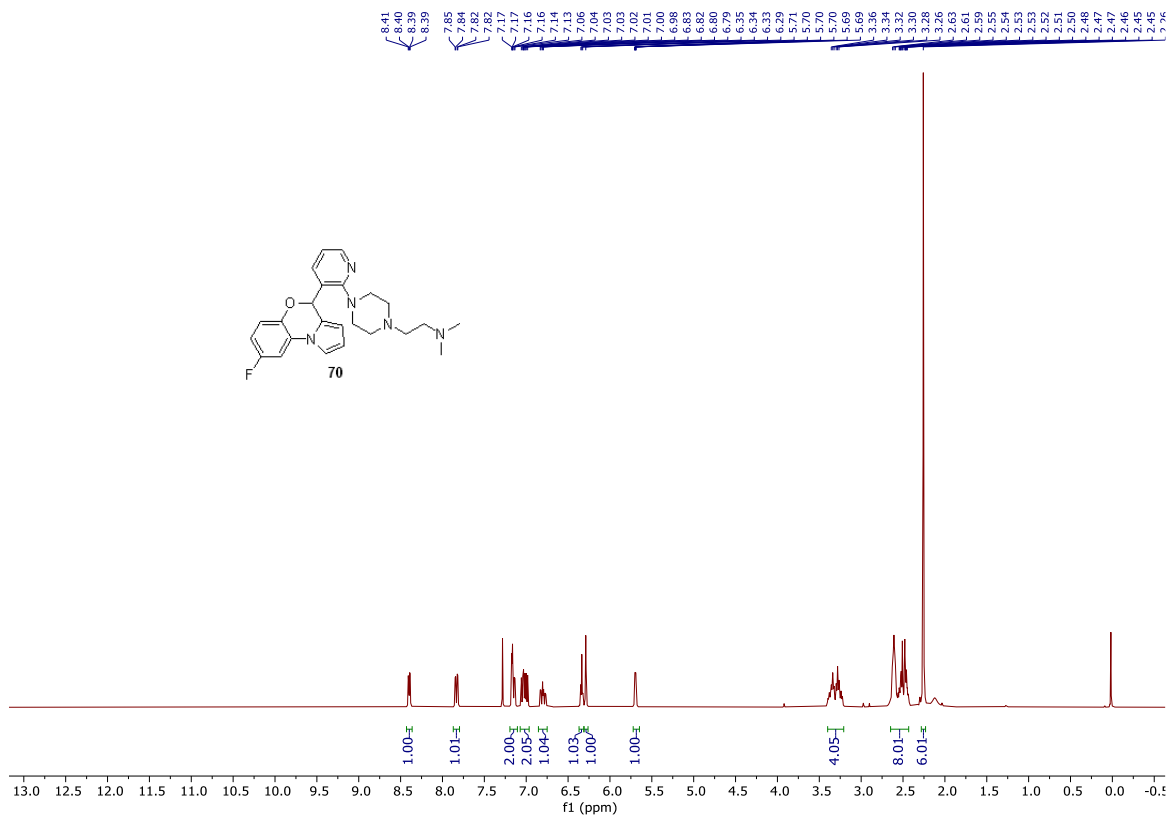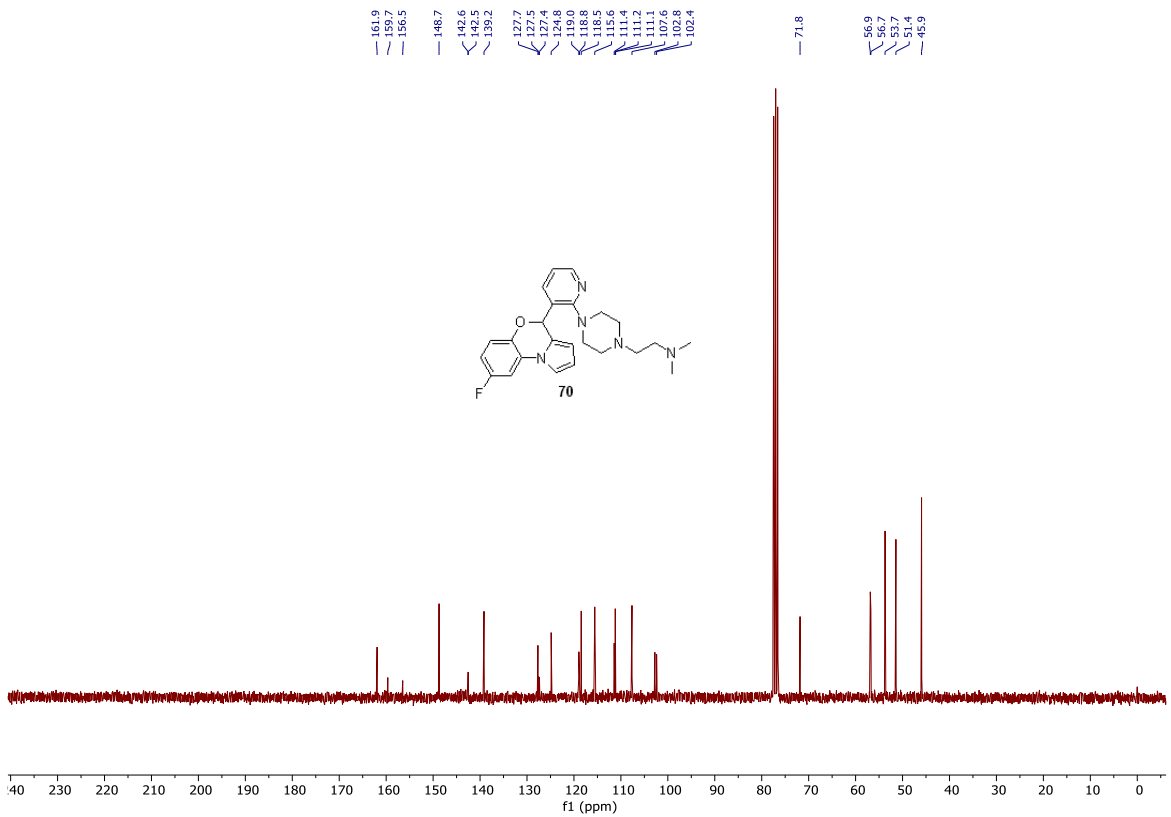

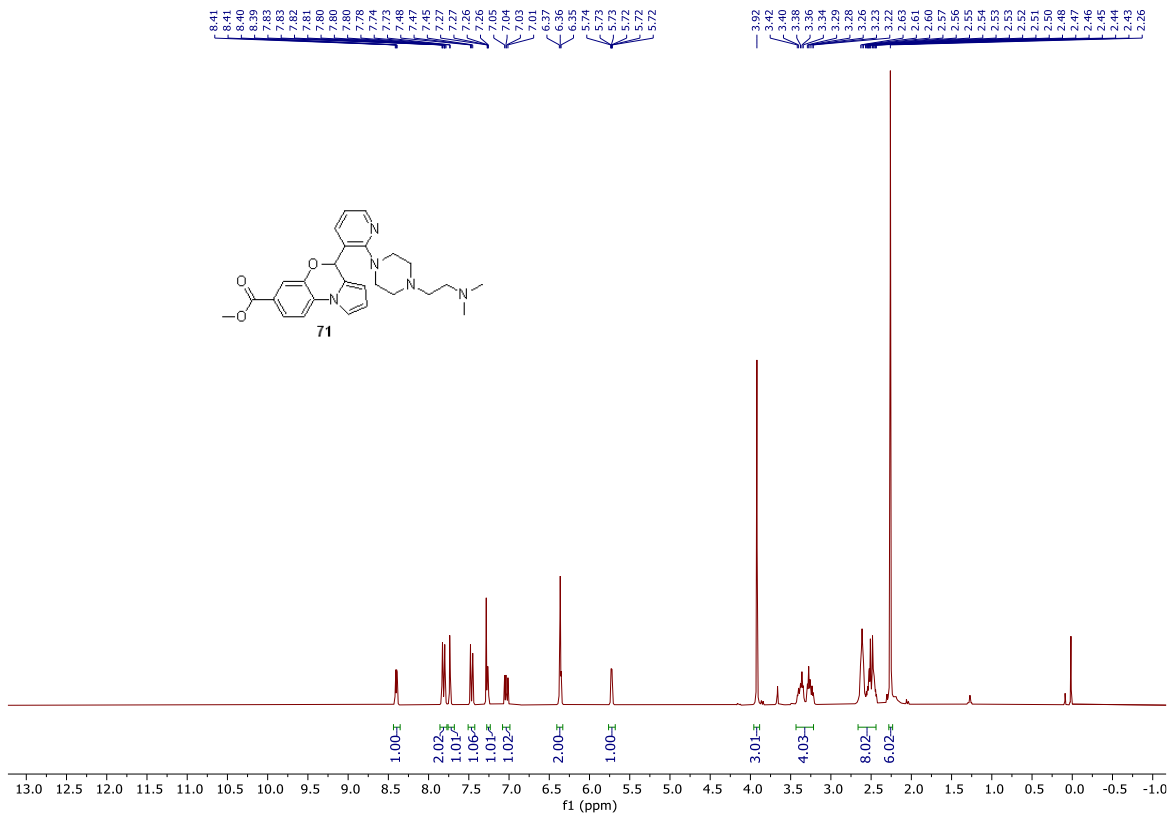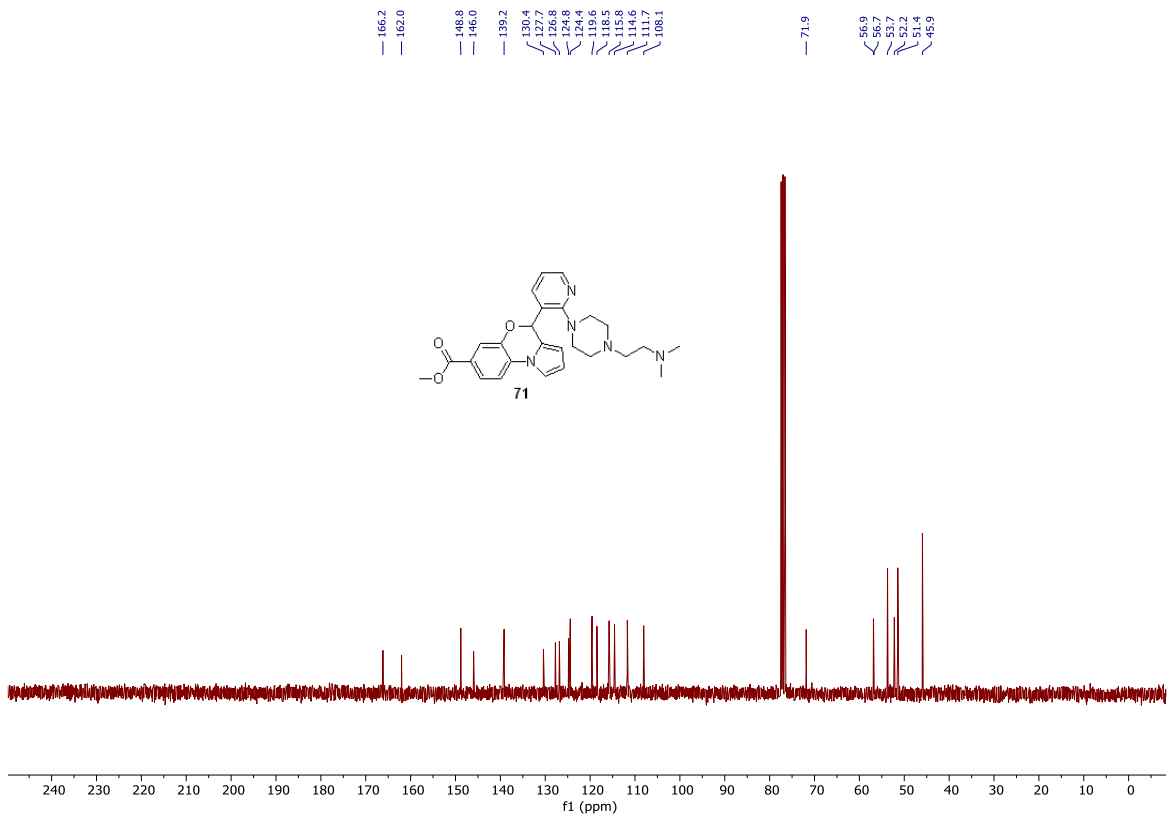

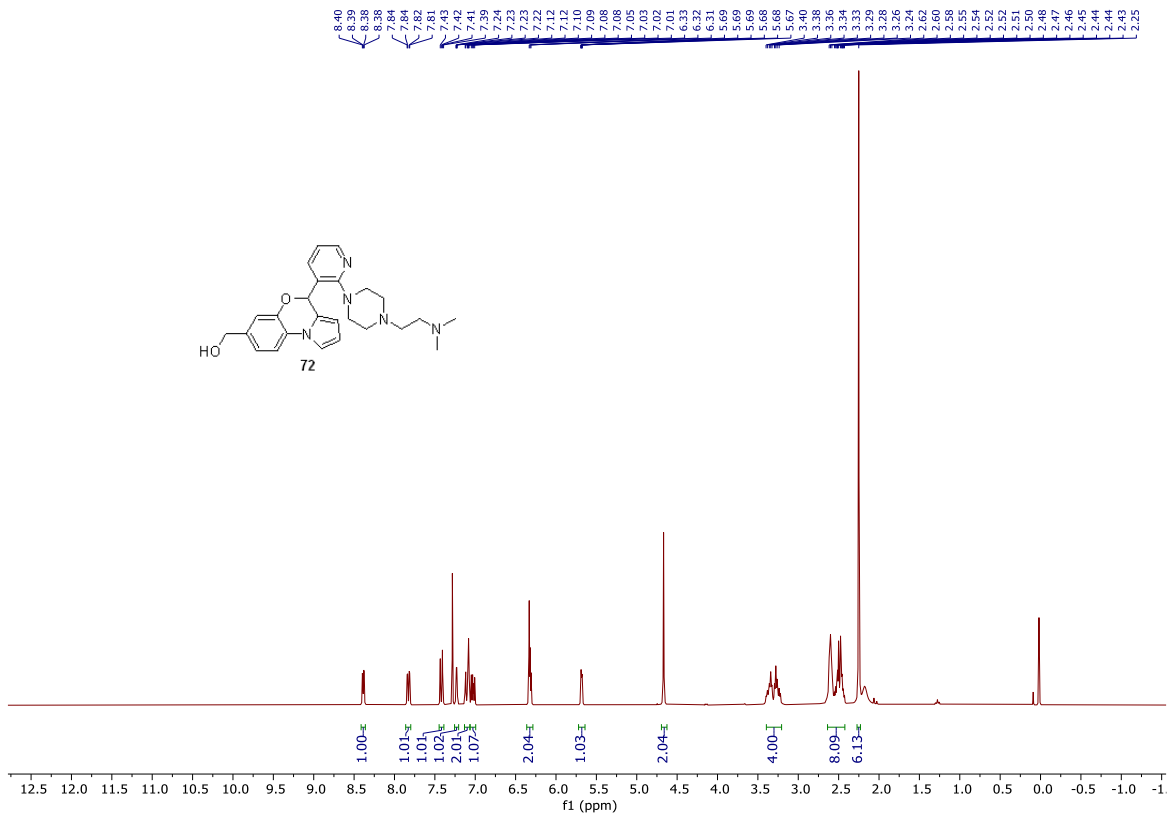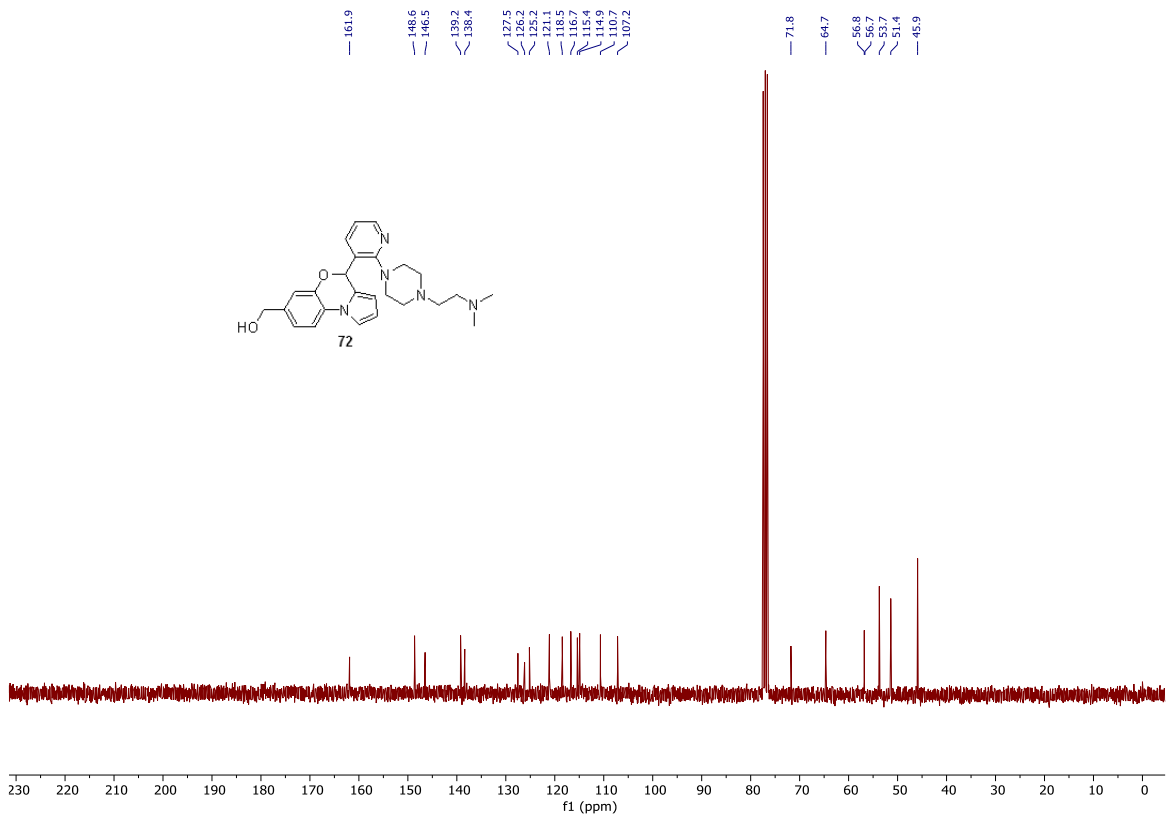

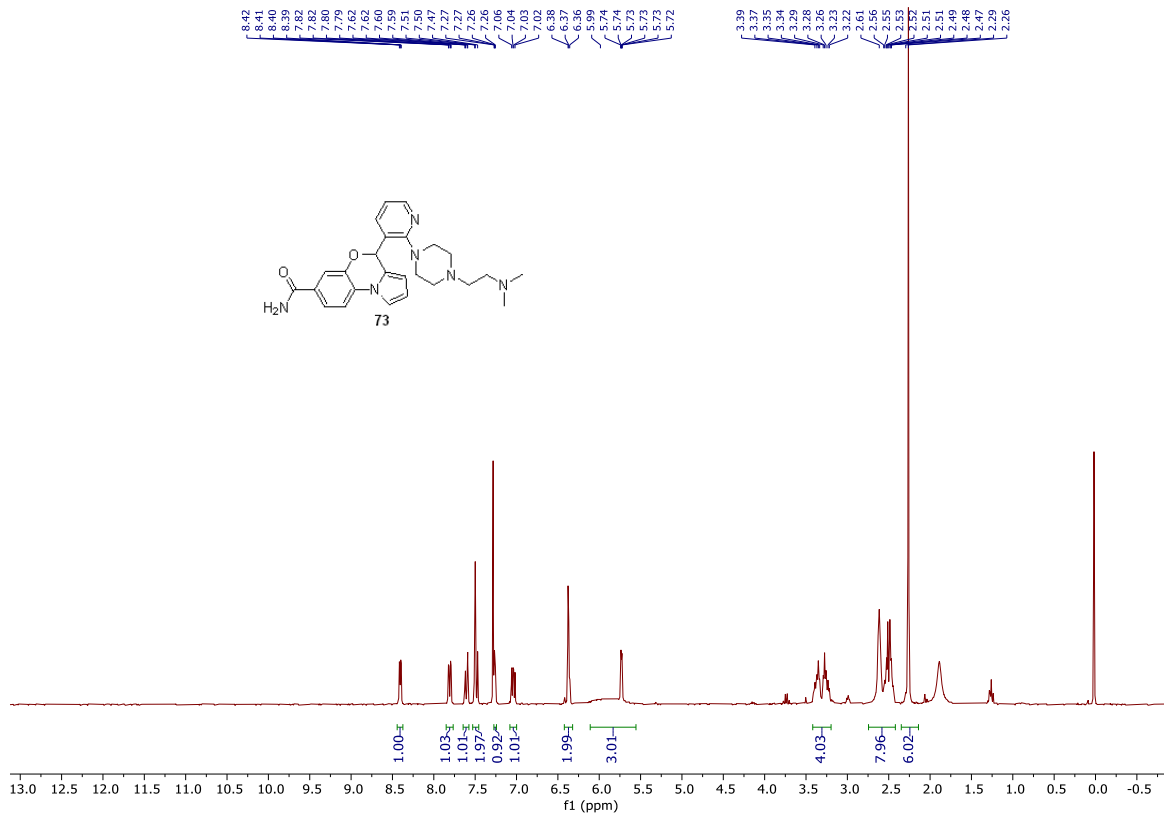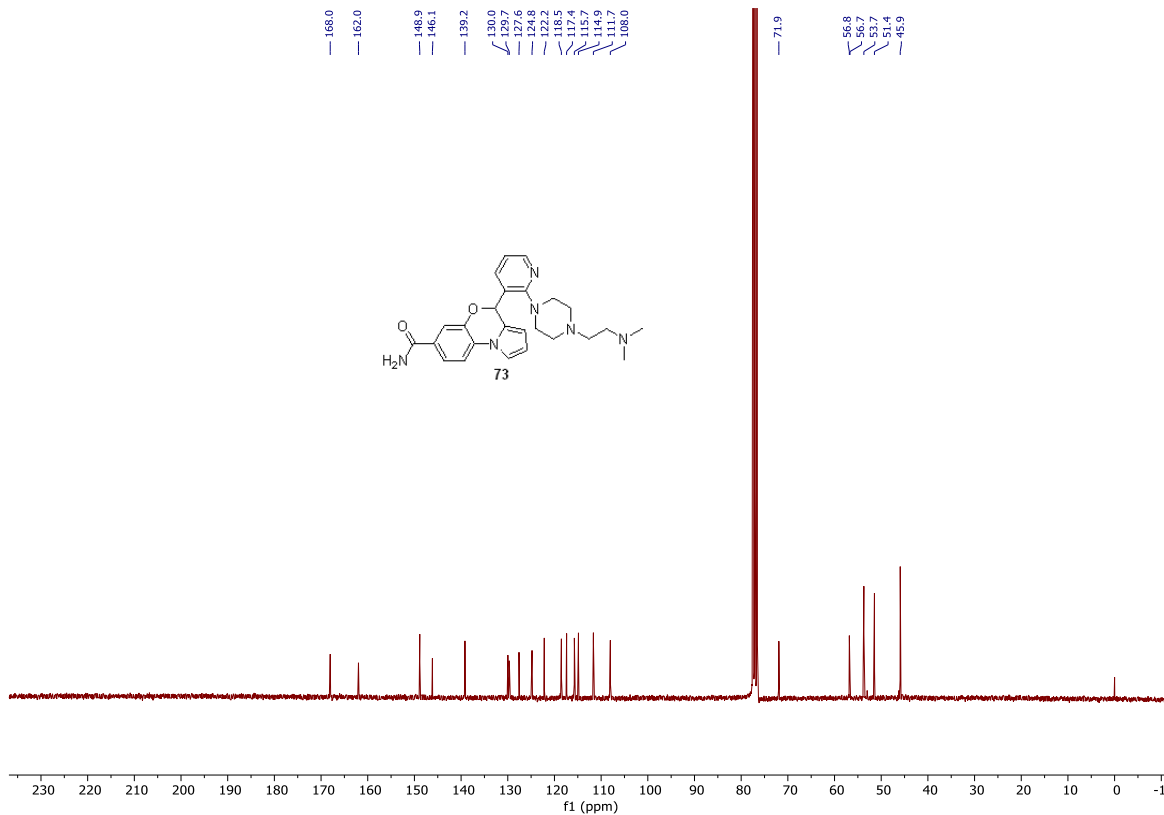

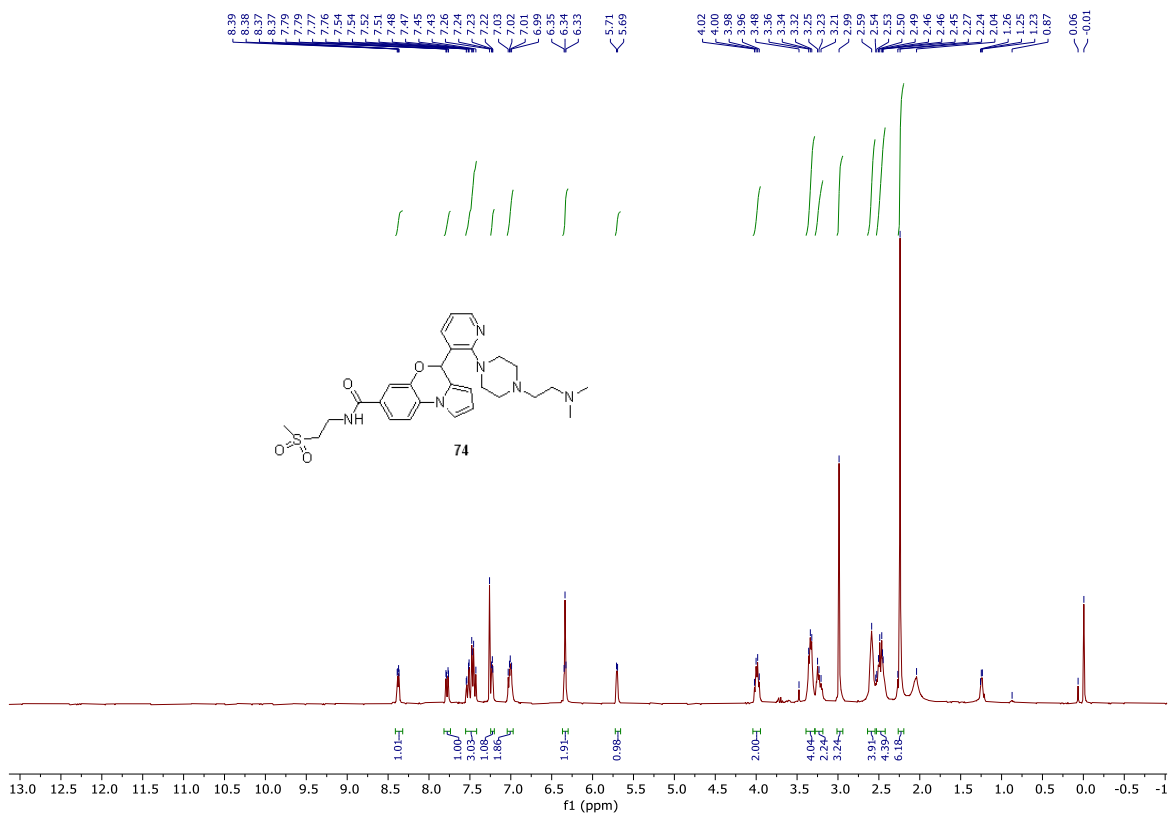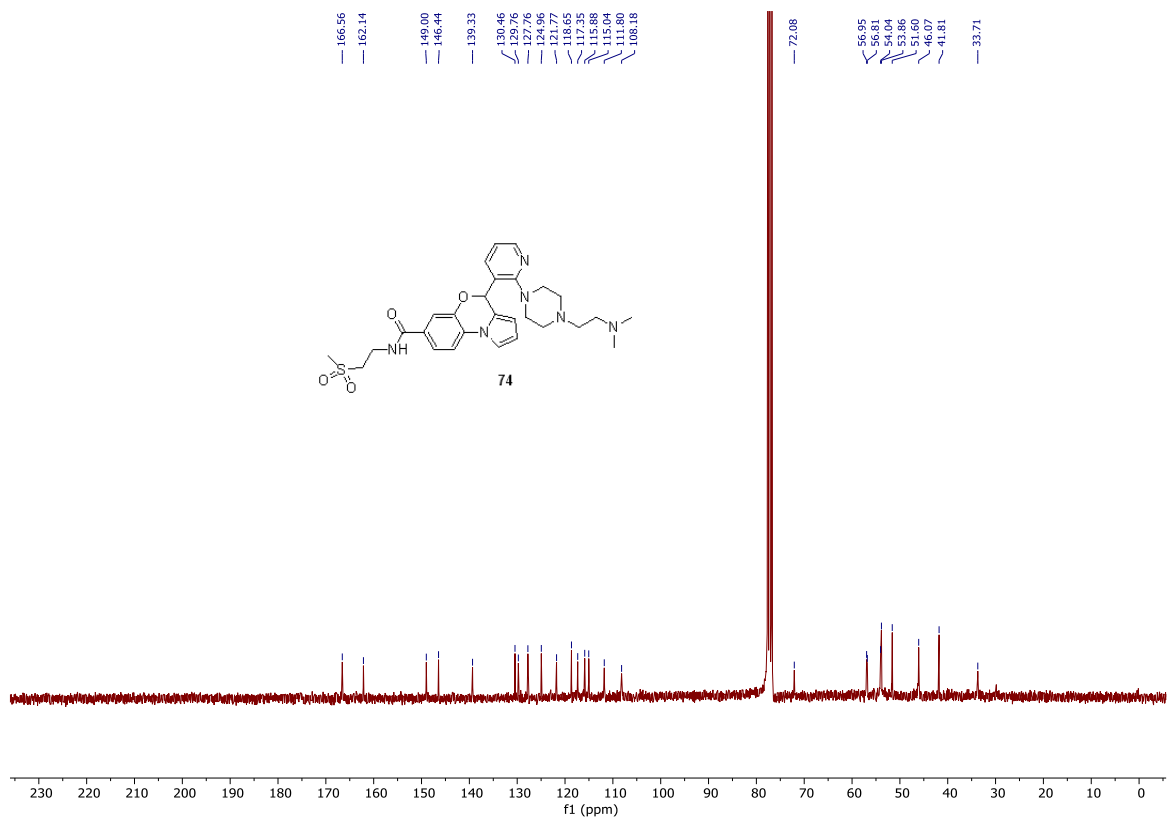

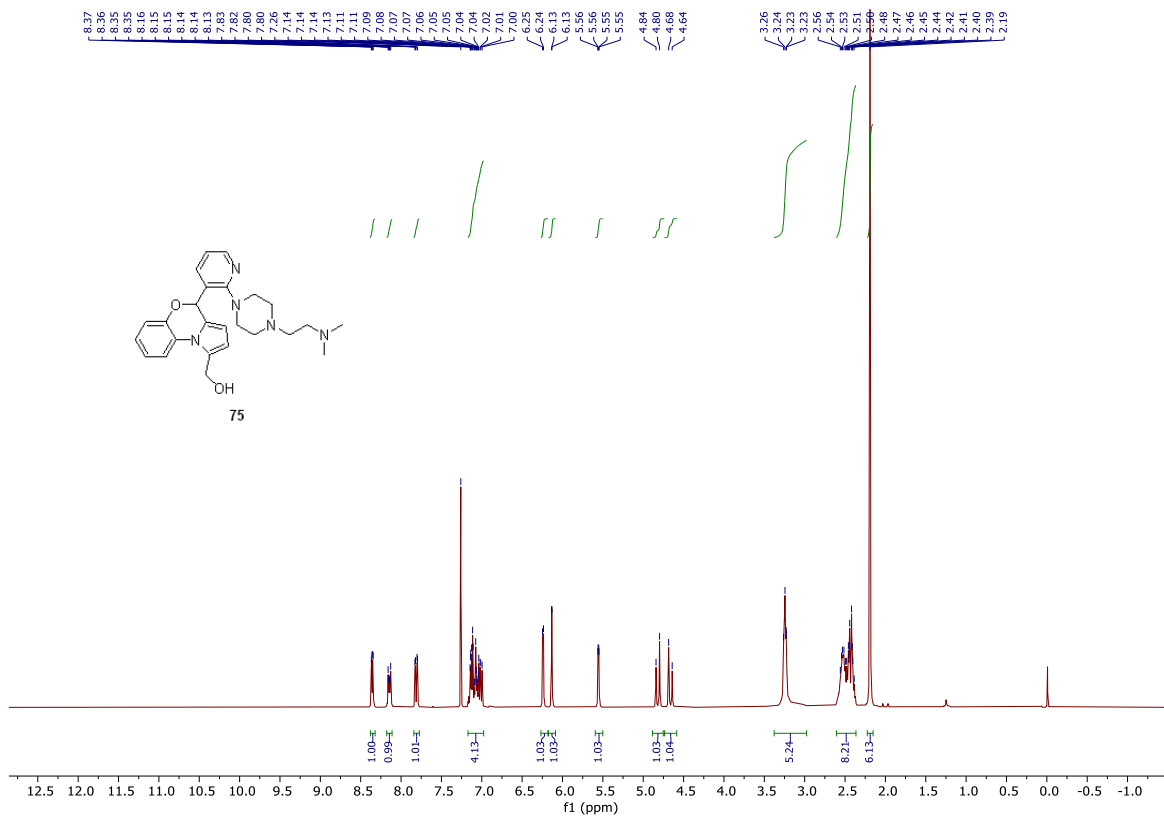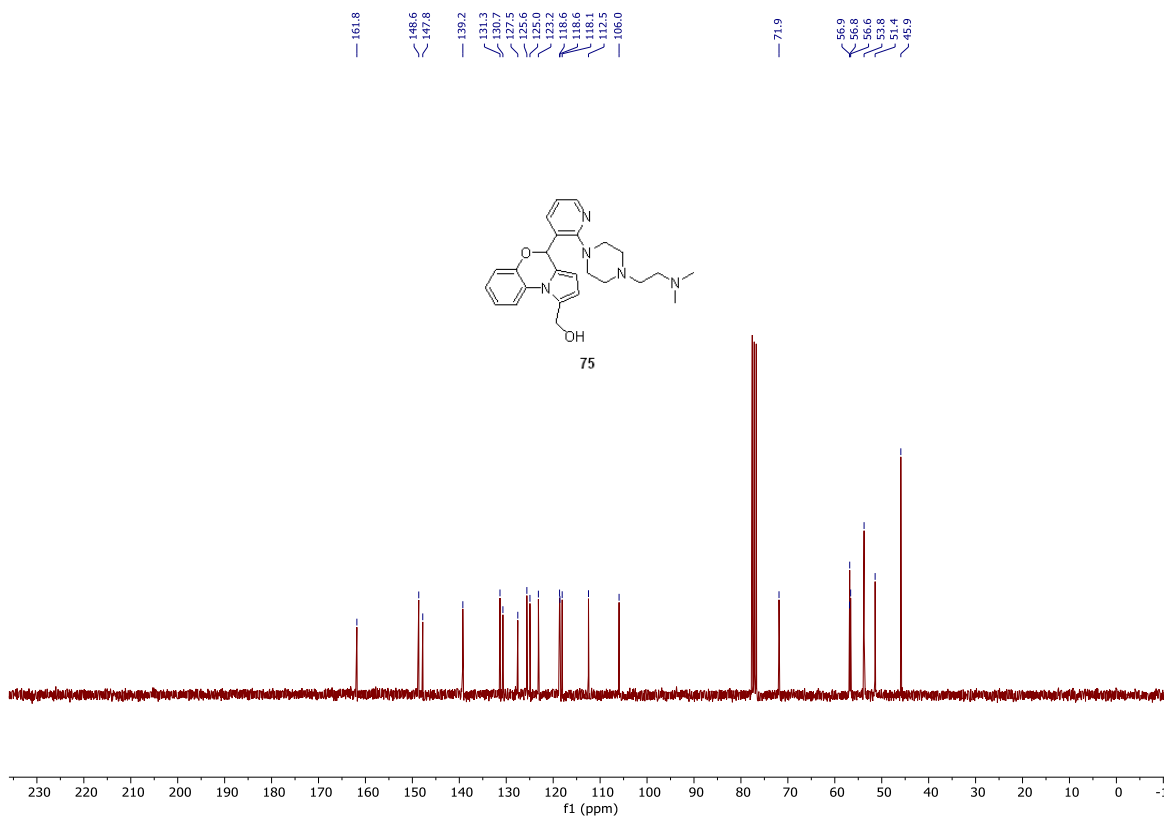



8.43  
8.42  
8.41  
7.87  
7.85  
7.84  
7.83  
7.82  
7.79  
7.76  
7.75  
7.74  
7.73  
7.22  
7.20  
7.19  
7.17  
7.15  
7.14  
7.13  
7.11  
7.11  
7.10  
7.08  
7.07  
7.06  
6.98  
6.98  
6.15  
5.70  
5.69  
3.38  
3.34  
3.31  
3.29  
3.28  
3.26  
3.24  
3.20  
2.60  
2.57  
2.56  
2.54  
2.52  
2.48  
2.29

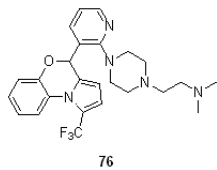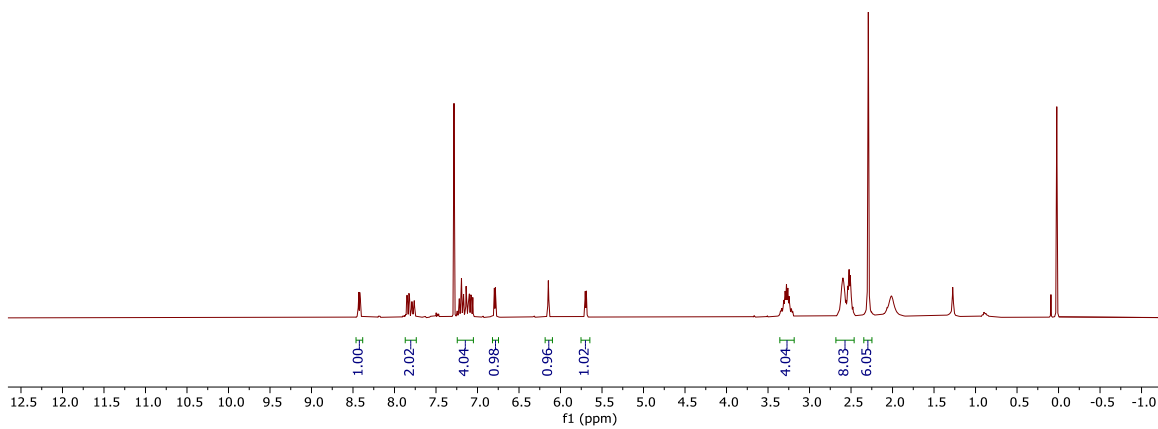

161.9  
148.9  
147.8  
139.0  
134.4  
134.4  
126.8  
126.4  
124.1  
122.1  
122.0  
121.9  
119.4  
118.6  
118.5  
118.4  
118.4  
118.4  
115.2  
115.1  
115.0  
115.0  
106.2  
71.7  
56.6  
56.4  
53.6  
51.4  
45.8

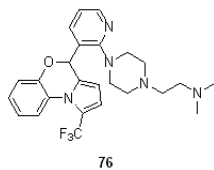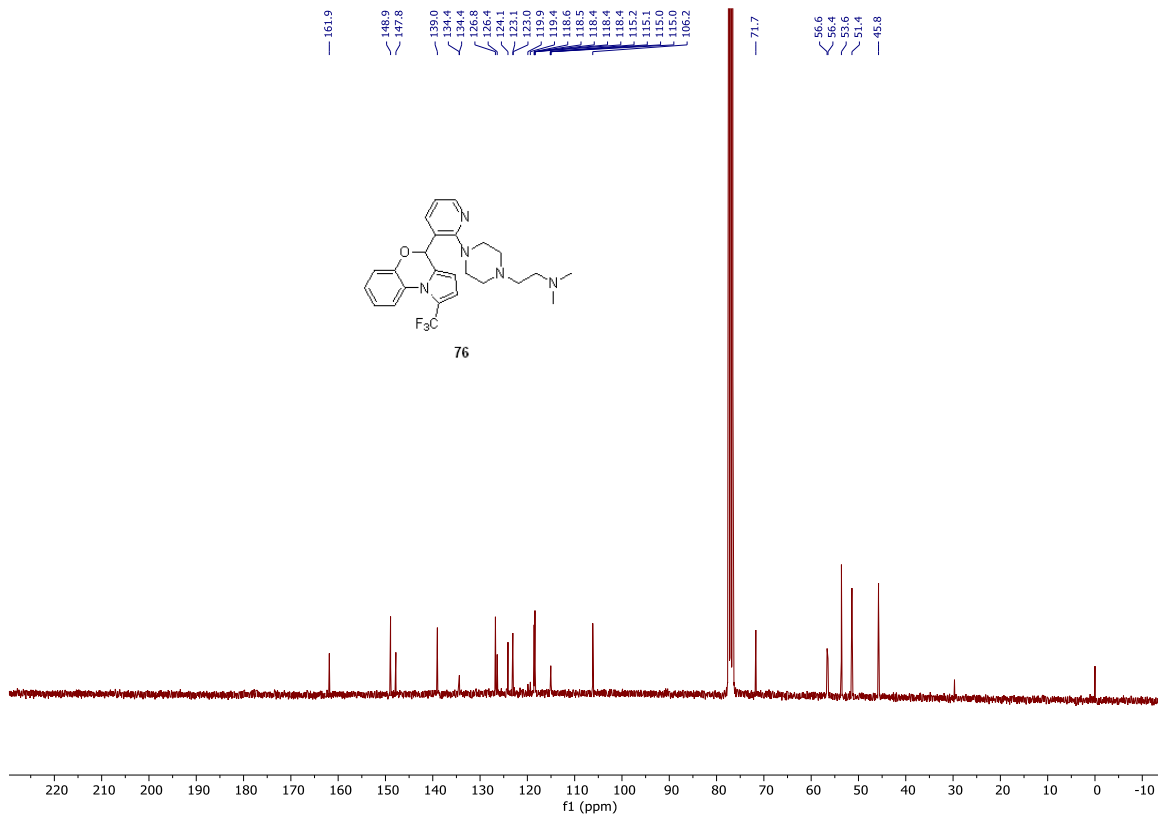

# Copy of $^{19}\text{F}$ NMR spectrum

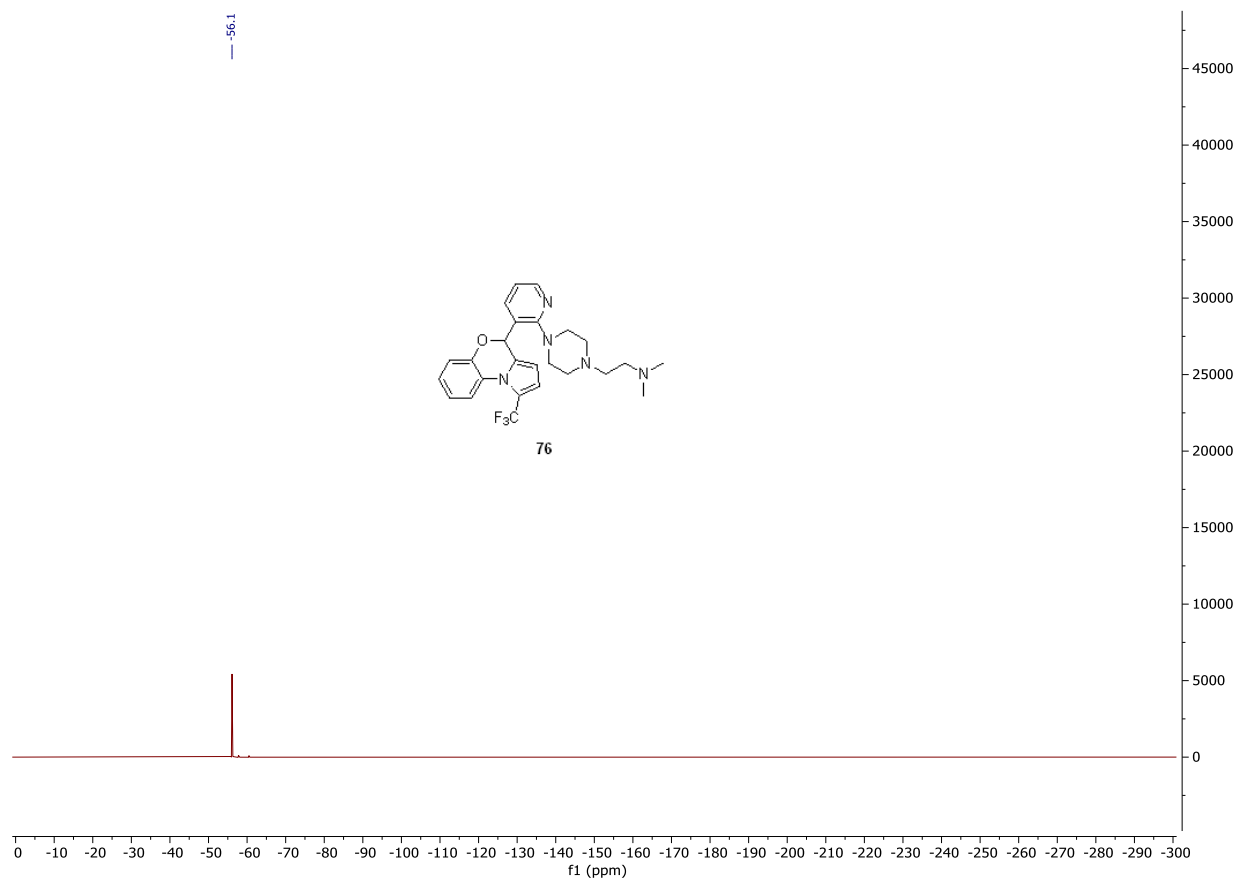

Supplement: NIHMS1857074-supplement-1.pdf [file NIHMS1857074-supplement-1.pdf]
